# Supplementary material
Source: PubMed Central journal article supplement (PMC2496923)
Supplement: NIHMS57330-supplement-1.pdf [file NIHMS57330-supplement-1.pdf]

# Stereoselectivity of Intramolecular S<sub>N</sub>' Cyclizations of Alkylolithium Reagents on Methoxy Alkenes

*Thomas E. La Cruz and Scott D. Rychnovsky\**  
Department of Chemistry, 516 Rowland Hall, University of California, Irvine  
Irvine, California 92697-2025  
srychnov@uci.edu

## Supporting information

| <b>Table of Contents</b>                                                                   | <b>Pages</b> |
|--------------------------------------------------------------------------------------------|--------------|
| General experimental                                                                       | S2           |
| Preparation and characterization data of intermediates.                                    | S2–S12       |
| Additional references                                                                      | S12          |
| <sup>1</sup> H NMR and <sup>13</sup> C NMR spectra of intermediates and cyclized products. | S13–S46      |

**General Experimental.**  $^1\text{H}$  NMR spectra were recorded at 500 MHz and  $^{13}\text{C}$  NMR spectra were recorded at 125 MHz. Chemical shifts of the  $^1\text{H}$  NMR spectra were referenced to residual chloroform at 7.26 ppm. Chemical shifts of  $^{13}\text{C}$  NMR spectra were referenced to  $\text{CDCl}_3$  at 77.0 ppm. Coupling constants ( $J$  values) are reported in Hz. Tetrahydrofuran (THF),  $\text{Et}_2\text{O}$ , and  $\text{CH}_2\text{Cl}_2$  were dried by filtration through alumina according to the procedure described by Grubbs.<sup>1</sup> Liquid chromatography was performed using forced flow (flash chromatography) of the indicated solvent system on silica gel. Enantiomeric excess was determined by HPLC utilizing a chiralcel OD-H column. Moisture sensitive reactions were performed under an atmosphere of argon using flame or oven dried glassware, and standard syringe/septa techniques.

**Preparation of a stock solution of LiDBB in THF (ca. 0.4 M).** To a two-necked round-bottom flask equipped with a glass stir-bar was added 4, 4'-di-*tert*-butylbiphenyl (DBB) (0.747 g, 2.72 mmol), THF (6.80 mL), and the solution was stirred under argon. To the stirring solution of DBB was introduced 1.0 mg of 1,10-phenanthroline, the mixture was cooled to 0 °C, and titrated with *n*-BuLi (2.5 M in hexanes, added to remove any residual trace of water) until a dark red end point persisted. Fresh lithium metal (0.226 g, 32.5 mmol) was prepared by submerging the wire in hexanes while scraping off the oxidized surface with an Exacto<sup>®</sup> knife. The shiny metal was then cut directly into the DBB solution under a stream of argon forming a dark green color within 5 minutes. The resulting mixture was allowed to stir at 0 °C for 5 h to form the desired LiDBB solution (ca. 0.4 M).

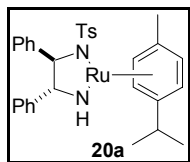

**Ru[(*R,R*)-TsDPEN]( $\eta^6$ -*p*-cymene) (20a).** The titled asymmetric hydrogen-transfer catalyst was prepared by a procedure developed by Noyori *et al.*<sup>2,3</sup>

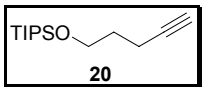

**1-(Triisopropylsilyloxy)but-3-yn-1-ol (20).** The known title compound was synthesized from commercially available 4-pentyn-1-ol using a literature procedure.<sup>4</sup>

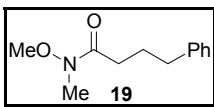

**N-Methoxy-N-methyl-4-phenylbutyramide (19).** A flask was charged with 4-phenylbutyric acid (9.00 g, 55.0 mmol), CH<sub>2</sub>Cl<sub>2</sub> (274 mL) and cooled to 0 °C. To this suspension was added triethylamine (15.3 mL, 110 mmol), isobutyl chloroformate (7.80 mL, 60.0 mmol), then *N,O*-dimethylhydroxylamine (5.60 g, 58.0 mmol). The reaction mixture was allowed to warm to room temperature and stirred for 20 h. The excess isobutyl chloroformate was quenched with saturated aqueous NaHCO<sub>3</sub> (50 mL). The aqueous layer was extracted with ether (3 x 100 mL), and washed with brine (3 x 50 mL). The combined organic layers were dried over anhydrous MgSO<sub>4</sub>, filtered, and concentrated under reduced pressure to give a yellow oil that was purified by flash chromatography (40% EtOAc/Hexanes) to afford 10.5 g (92%) of the desired amide as a colorless oil: *R*<sub>f</sub> = 0.36 (40% EtOAc/Hexanes); <sup>1</sup>H NMR (500 MHz, CDCl<sub>3</sub>) δ 7.27 (m, 2H), 7.19 (m, 3H), 3.59 (s, 3H), 2.93 (s, 3H), 2.68 (t, 2H, *J* = 7.5), 2.43 (t, 2H, *J* = 6.7), 1.98 (m, 2H) ppm; <sup>13</sup>C NMR (125 MHz, CDCl<sub>3</sub>) δ 174.0, 141.5, 128.2, 128.0, 125.4, 60.8, 35.0, 31.8, 30.8, 25.8 ppm; IR (neat) 3563, 2938, 1667, 1497, 1454, 1179, 1105 cm<sup>-1</sup>; HRMS (CI/ammonia) *m/z* calcd for C<sub>12</sub>H<sub>17</sub>NO<sub>2</sub> [M]<sup>+</sup> 207.1259; found 207.1259.

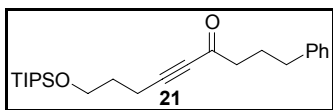

**1-Phenyl-9-(triisopropylsilyloxy)non-5-yn-4-one (21).** A solution of alkyne **20** (8.00 g, 33.0 mmol) in THF (221 mL) was cooled to 0 °C at which time *n*-butyllithium (2.5 M in

hexanes, 14.0 mL, 35.0 mmol) was added dropwise over a five min. period. The solution was stirred at 0 °C for 20 min., then a solution of *N*-methoxy-*N*-methyl-4-phenylbutyramide (**19**) (6.90 g, 33.3 mmol) in THF (56.0 mL, precooled to 0 °C) was added dropwise over a 10 min. period. The colorless solution was stirred at 0 °C for 1.5 h, the excess anion was then quenched with saturated aqueous NH<sub>4</sub>Cl (120 mL), and the mixture was extracted with hexanes (2 x 200 mL). The combined organic layers were washed with brine, dried over anhydrous MgSO<sub>4</sub>, filtered, and concentrated in *vacuo*. The resulting oil was purified by silica gel chromatography (5% EtOAc/Hexanes) to afford 12.2 g (95% yield) of the title compound as a colorless oil: R<sub>f</sub> = 0.39 (5% EtOAc/Hexanes); <sup>1</sup>H NMR (500 MHz, CDCl<sub>3</sub>) δ 7.28 (m, 2H), 7.19 (m, 2H), 3.78 (t, 2H, *J* = 5.9), 2.65 (t, 2H, *J* = 7.4), 2.55 (t, 2H, *J* = 7.5), 2.51 (t, 2H, *J* = 7.1), 2.00 (dt, 2H *J* = 15.2, 7.7), 1.81 (m, 2H), 1.09 (m, 21H) ppm; <sup>13</sup>C NMR (125 MHz, CDCl<sub>3</sub>) δ 187.7, 141.3, 128.4, 128.4, 125.9, 94.0, 80.2, 61.4, 44.6, 34.8, 30.9, 25.5, 17.9, 15.4, 11.9 ppm; IR (neat) 2944, 2213, 1675, 1463, 1383, 1238 cm<sup>-1</sup>; HRMS (CI/ammonia) *m/z* calcd for C<sub>24</sub>H<sub>39</sub>O<sub>2</sub>Si [M + H]<sup>+</sup> 387.2719; found 387.2723.

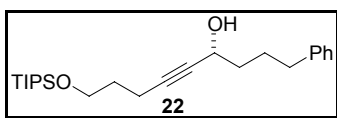

**(*R*)-1-Phenyl-9-triisopropylsilyloxy-5-yn-4-ol (22).** A solution of 1-phenyl-9-triisopropylsilyloxy-5-yn-4-one **21** (7.00 g, 18.1 mmol) in freshly distilled isopropanol (181 mL) was sparged with argon for 20 min. To this solution was added Ru[(*R,R*)-TsDPEN](η<sup>6</sup>-*p*-cymene) (**21a**) (0.109 g, 0.181 mmol) at room temperature. The solution immediately turned purple then red and finally, after 2h, an orange color. At the end of the 2 h period another portion of the catalyst (0.109 g, 0.181 mmol) was added to the solution and the mixture was allowed to stir for another 2 h. Another portion of the catalyst was added (0.109 g

0.181 mmol) and the solution was stirred for 2 h. The resulting brown solution was concentrated and the brown residue was purified by passing it through a silica gel column (10% EtOAc/Hexanes) (three times) to give 5.72 g (81% yield, 97% *ee*) of the title compound as a slightly yellow oil:  $R_f = 0.32$  (10% EtOAc/Hexanes);  $[\alpha]_D -4.2$  (*c* 0.10,  $\text{CHCl}_3$ );  $^1\text{H NMR}$  (500 MHz,  $\text{CDCl}_3$ )  $\delta$  7.29 (m, 2H), 7.20 (m, 3H), 4.37 (m, 1H), 3.77 (t, 2H,  $J = 6.1$ ), 2.67 (t, 2H,  $J = 7.6$ ), 2.34 (dt, 2H,  $J = 7.1, 1.8$ ), 1.75 (m, 7H), 1.08 (m, 21H) ppm;  $^{13}\text{C NMR}$  (125 MHz,  $\text{CDCl}_3$ )  $\delta$  142.1, 128.4, 128.3, 125.7, 85.3, 81.2, 62.5, 61.8, 37.6, 35.5, 31.9, 26.9, 18.0, 15.1, 11.9 ppm; IR (neat) 3350, 2942, 1604, 1463, 1384, 1248,  $\text{cm}^{-1}$ ; HRMS (CI/ammonia)  $m/z$  calcd for  $\text{C}_{21}\text{H}_{33}\text{O}_2\text{Si}$   $[\text{M} - i\text{-Pr}]^+$  345.2250; found 345.2246.

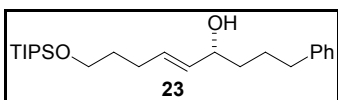

**(*R*)-1-Phenyl-9-triisopropylsilyloxy-5-en-4-ol (23).** A flask was charged with RedAl<sup>®</sup> (65% solution in toluene, 7.67 mL, 29.9 mmol) and THF (99.8 mL), and the resulting solution was cooled to 0 °C. To the cool stirring mixture was added a solution of alcohol **22** (2.91 g, 7.49 mmol) in THF (74.9 mL) dropwise over a five minute period. Once the exotherm was complete, the solution was warmed to room temperature and stirred for 8 h. The vigorously stirred mixture was cooled to 0 °C and an aqueous solution of potassium tartrate (2.0 M, 30 mL) and diethyl ether (30 mL) were sequentially introduced into the reaction vessel. The mixture was warmed to room temperature and stirred for 0.5 h. The layers were separated, and the aqueous layer was extracted with Et<sub>2</sub>O (3 x 30 mL). The combined organic layers were washed with brine (3 x 20 mL), dried over anhydrous MgSO<sub>4</sub>, filtered, and concentrated under reduced pressure. The resulting yellow residue was purified by flash chromatography (10% EtOAc/Hexanes) to give 2.63 g (90% yield) of the desired alcohol as a colorless oil:  $R_f = 0.32$  (10% EtOAc/Hexanes);  $[\alpha]_D -1.5$  (*c* 0.20,  $\text{CHCl}_3$ );  $^1\text{H NMR}$  (500 MHz,  $\text{CDCl}_3$ )  $\delta$  7.29 (m, 2H),

7.20 (m, 3H), 5.67 (dt, 1H,  $J = 15.1, 6.6$ ), 5.49 (dd, 1H,  $J = 15.4, 7.1$ ), 4.07 (m, 1H), 3.70 (t, 2H,  $J = 6.4$ ), 2.65 (t, 2H,  $J = 7.4$ ), 2.13 (q, 2H,  $J = 7.3$ ), 1.77–1.60 (m, 5H), 1.57–1.52 (m, 2H), 1.08 (m, 21H) ppm;  $^{13}\text{C}$  NMR (125 MHz,  $\text{CDCl}_3$ )  $\delta$  142.3, 133.1, 131.7, 128.4, 128.2, 125.7, 73.0, 62.6, 36.8, 35.8, 32.4, 28.5, 27.3, 18.0, 12.0 ppm; IR (neat) 3350, 2939, 1669, 1604, 1455, 1383, 1248, 1110  $\text{cm}^{-1}$ ; HRMS (CI/ammonia)  $m/z$  calcd for  $\text{C}_{21}\text{H}_{35}\text{O}_2\text{Si}$   $[\text{M} - i\text{-Pr}]^+$  347.2406; found 347.2411.

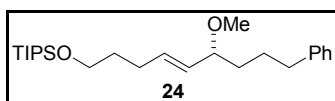

**(R)-Triisopropyl-(6-methoxy-9-phenylnon-4-enyloxy)-silane (24).** A solution of alcohol **23** (4.66 g, 11.9 mmol) in THF (23.6 mL) was cooled to 0 °C. Sodium hydride (60% dispersion in mineral oil, 2.06 g, 53.6 mmol), and methyl iodide (3.71 mL, 59.6 mmol) were sequentially added to the reaction mixture. The resulting grey mixture was allowed to stir for 15 h, cooled to 0 °C, and the excess sodium hydride was quenched with MeOH (20 mL). The mixture was poured into a separatory funnel containing 50 mL of water, the aqueous layer was extracted with  $\text{Et}_2\text{O}$  (3 x 40 mL), the combined organic layers were washed with brine, dried over anhydrous  $\text{MgSO}_4$ , filtered, and concentrated under reduced pressure. The resulting residue was purified by flash chromatography (5% EtOAc/Hexanes) to afford 4.59 g (95% yield) of the desired methyl ether **24** as a colorless oil:  $R_f = 0.56$  (5% EtOAc/Hexanes);  $[\alpha]_D +2.6$  ( $c$  0.10,  $\text{CHCl}_3$ );  $^1\text{H}$  NMR (500 MHz,  $\text{CDCl}_3$ )  $\delta$  7.29 (m, 2H), 7.19 (m, 3H), 5.65 (dt, 1H,  $J = 15.2, 6.7$ ), 5.30 (dd, 1H,  $J = 15.4, 8.3$ ), 3.73 (t, 1H,  $J = 6.5$ ), 3.50 (m, 1H), 3.26 (s, 3H), 2.64 (t, 2H,  $J = 7.1$ ), 2.18 (q, 2H,  $J = 7.0$ ), 1.75–1.63 (m, 5H), 1.55–1.48 (m, 1H), 1.10 (m, 21H) ppm;  $^{13}\text{C}$  NMR (125 MHz,  $\text{CDCl}_3$ )  $\delta$  142.5, 133.8, 130.7, 128.4, 128.2, 125.6, 82.4, 62.7, 55.87, 35.9, 35.3, 32.5, 28.5, 27.4, 18.0, 12.0 ppm; IR (neat) 2941, 1668, 1604, 1463, 1383, 1106  $\text{cm}^{-1}$ ; HRMS (CI/ammonia)  $m/z$  calcd for  $\text{C}_{24}\text{H}_{41}\text{O}_2\text{Si}$   $[\text{M} - \text{MeO}]^+$  373.2927; found 373.2934.

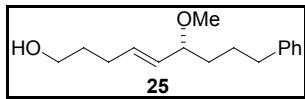

**(R)-6-Methoxy-9-phenylnon-4-en-1-ol (25).** To a solution of allyl ether **24** (3.60 g, 8.90 mmol) in THF (44.5 mL), cooled to 0 °C, was added TBAF (1.0 M solution in THF, 2.75 mL, 11.6 mmol) in one portion. The solution was warmed to room temperature, stirred for 10 h, and then brine (30 mL) was introduced into the reaction vessel. The mixture was extracted with Et<sub>2</sub>O (3 x 40 mL), the combined organic layers were dried over anhydrous MgSO<sub>4</sub>, filtered, and concentrated. The resulting oil was purified by silica gel chromatography (40% EtOAc/Hexanes) to give 2.18 g of the desired alcohol **25** as a colorless oil in 99% yield:  $R_f = 0.51$  (40% EtOAc/Hexanes);  $[\alpha]_D^{20} +19$  ( $c$  0.19, CHCl<sub>3</sub>); <sup>1</sup>H NMR (500 MHz, CDCl<sub>3</sub>)  $\delta$  7.29 (m, 2H), 7.18 (m, 3H), 5.64 (dt, 1H,  $J = 15.4, 6.7$ ), 5.29 (ddt, 1H,  $J = 15.4, 8.2, 1.4$ ), 3.63 (m, 2H), 3.49 (m, 1H), 3.24 (s, 3H), 2.62 (t, 2H,  $J = 7.2$ ), 2.15 (m, 2H), 2.00 (s, 1H), 1.70–1.61 (m, 5H), 1.52–1.47 (m, 1H) ppm; <sup>13</sup>C NMR (125 MHz, CDCl<sub>3</sub>)  $\delta$  142.4, 133.3, 130.8, 128.3, 128.2, 125.6, 82.3, 62.0, 55.7, 35.8, 35.1, 32.0, 28.4, 27.2 ppm; IR (neat) 3392, 2934, 1667, 1603, 1496, 1453, 1364, 1094 cm<sup>-1</sup>; HRMS (CI/ammonia)  $m/z$  calcd for C<sub>16</sub>H<sub>23</sub>O<sub>2</sub> [M – H]<sup>+</sup> 247.1698; found 247.1692.

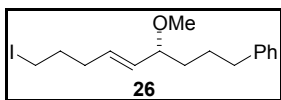

**(R)-9-Iodo-4-methoxynon-5-enyl-benzene (26).** To a solution of alcohol **25** (1.60 g, 6.44 mmol) in Et<sub>2</sub>O (64.4 mL) at room temperature was added PPh<sub>3</sub> (3.38 g, 12.9 mmol) and imidazole (0.875 g, 12.9 mmol). A 0.3 M solution of I<sub>2</sub> (1.43 g, 11.3 mmol) in Et<sub>2</sub>O (37.6 mL) was added dropwise over a 10 min. period. At the end of the addition of I<sub>2</sub>, TLC analysis of the reaction mixture indicated that all starting material had been consumed. At this point another portion of I<sub>2</sub> (10 mL of a 0.3 M solution in Et<sub>2</sub>O) was added to the reaction mixture, which was

then followed by the addition of MeOH (10 mL) to remove excess PPh<sub>3</sub>. The excess I<sub>2</sub> was quenched with aqueous NaHSO<sub>3</sub> (2.0 M solution, 20 mL). The layers were separated, and the aqueous layer was extracted with hexanes (3 x 20 mL). The combined organic layers were washed with a saturated aqueous solution of NaHCO<sub>3</sub> (2 x 10 mL), brine (3 x 10 mL), dried over anhydrous MgSO<sub>4</sub>, filtered, and concentrated under reduced pressure. Purification of the resulting oil by silica gel chromatography (10% EtOAc/Hexanes) gave the title compound (iodide **26**, 2.23 g, 97% yield) as a colorless oil: R<sub>f</sub> = 0.64 (10% EtOAc/Hexanes); [α]<sub>D</sub> +12 (c 0.29, CHCl<sub>3</sub>); <sup>1</sup>H NMR (500 MHz, CDCl<sub>3</sub>) δ 7.28 (m, 2H), 7.18 (m, 3H), 5.55 (dt, 1H, *J* = 15.2, 6.7), 5.36 (ddt, 1H, *J* = 15.4, 8.0, 1.3), 3.48 (m, 1H), 3.23 (s, 3H), 3.18 (t, 2H, *J* = 6.9), 2.62 (t, 2H, *J* = 7.2), 2.18 (m, 2H), 1.92 (app quintet, 2H, *J* = 7.0), 1.72–1.60 (m, 3H), 1.53–1.45 (m, 1H) ppm; <sup>13</sup>C NMR (125 MHz, CDCl<sub>3</sub>) δ 142.4, 132.1, 131.5, 128.4, 128.3, 125.7, 82.1, 55.9, 35.9, 35.2, 32.8, 32.6, 27.3, 6.2 ppm; IR (neat) 2930, 1667, 1603, 1496, 1452, 1214 cm<sup>-1</sup>; HRMS (CI/ammonia) *m/z* calcd for C<sub>16</sub>H<sub>23</sub>IO [M]<sup>+</sup> 358.0794; found 358.0790.

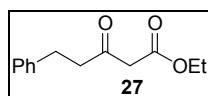

**3-Oxo-5-phenyl-pentanoic acid ethyl ester (27).** A literature procedure was used for the synthesis of β-keto ester **27**.<sup>5</sup>

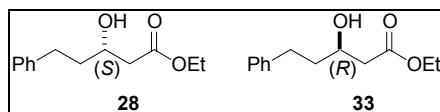

**(S)- and (R)-3-Hydroxy-5-phenyl-pentanoic acid ethyl ester (28 and 33).** β-Hydroxy esters **28** and **33** were synthesized by using a literature procedure.<sup>6</sup>

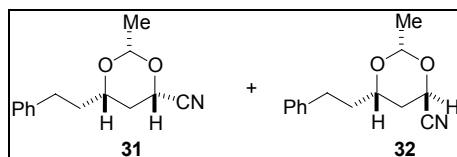



**cis- and trans- acetals 31 and 32.** (*S*)-3-Hydroxy-5-phenyl-pentanoic acid ethyl ester (1.80 g, 8.09 mmol) and *N,N*-dimethyl-(trimethylsilyl)amine (1.37 mL, 8.58 mmol) were combined neat and stirred for 16 h. The reaction mixture was then passed through a silica plug, eluting with diethyl ether, and concentrated under reduced pressure to give 2.36 g of the TMS-protected product **29**. Ester **29** (2.20 g, 6.79 mmol) was dissolved in 67.9 mL of anhydrous diethyl ether and the solution was cooled to  $-78\text{ }^{\circ}\text{C}$ . DIBALH (1.0 M in toluene, 8.15 mL, 8.15 mmol) was added dropwise over a five minute period, and the reaction mixture was stirred for 1.5 h. The excess DIBALH was quenched at  $-78\text{ }^{\circ}\text{C}$  with 1 mL of ethyl formate followed by 25 mL of 10% aqueous acetic acid solution and the reaction mixture was warmed to  $0\text{ }^{\circ}\text{C}$ . The resulting layers were separated, and the aqueous phase was extracted with  $\text{Et}_2\text{O}$  (3 x 50 mL). The combined organic layers were washed with 50 mL of water, saturated  $\text{NaHCO}_{3(\text{aq})}$  (3 x 50 mL), dried over anhydrous  $\text{MgSO}_4$ , filtered, and concentrated under reduced pressure to give 1.83 g of the desired aldehyde **30** as a colorless oil. The aldehyde **30** (1.83 g, 7.31 mmol) was cooled to  $0\text{ }^{\circ}\text{C}$ , then TMSCN (0.590 mL, 4.41 mmol) was introduced into the reaction vessel followed by 1 mg of KCN/18-crown-6 complex. The reaction mixture was warmed to room temperature, stirred for 1 hour 15 minutes, and then 10 mL acetaldehyde and CSA (0.170 g, 0.731 mmol) were added to the reaction vessel. The resulting pale yellow mixture was allowed to stir at room temperature for 20 h. Saturated  $\text{NaHCO}_{3(\text{aq})}$  (30 mL) was added, the layers were separated, and the aqueous layer was extracted with  $\text{Et}_2\text{O}$  (3 x 70 mL). The combined organic layers were dried over anhydrous  $\text{MgSO}_4$ , filtered, and concentrated under reduced pressure, and the resulting residue was purified by flash chromatography (20%  $\text{Et}_2\text{O}$ /Pentane) to give 1.32 g (78% overall yield) of cis/trans acetals **31** and **32** (1:1.1 cis/trans) (contaminated with ~3-5% of the axial epimer at C2). A small portion was further purified to give diastereomers **31** and **32**.

Cis isomer **31**:  $R_f = 0.32$  (15% Et<sub>2</sub>O/Pentane);  $[\alpha]_D -32$  ( $c$  0.5, CHCl<sub>3</sub>); <sup>1</sup>H NMR (500 MHz, CDCl<sub>3</sub>)  $\delta$  7.30 (m, 2H), 7.20 (m, 3H), 4.67 (q, 1H,  $J = 5.1$ ), 4.50 (d, 1H,  $J = 2.9$ ), 3.56 (m, 1H), 2.78 (ddd, 1H,  $J = 14.1, 9.1, 5.6$ ), 2.70 (dt, 1H,  $J = 14.1, 8.0$ ), 1.93 (m, 2H), 1.79 (m, 2H), 1.41 (d, 3H,  $J = 5.1$ ); <sup>13</sup>C NMR (125 MHz, CDCl<sub>3</sub>)  $\delta$  141.1, 128.5, 128.4, 126.0, 117.1, 99.3, 74.2, 64.1, 36.7, 34.3, 30.7, 20.8 ppm; IR (neat) 2930, 1602, 1496, 1412, 1333, 1137 cm<sup>-1</sup>; HRMS (CI/ammonia)  $m/z$  calcd for C<sub>14</sub>H<sub>18</sub>NO<sub>2</sub> [M]<sup>+</sup> 231.1259 found 231.1259.

Trans isomer **32**:  $R_f = 0.39$  (15% Et<sub>2</sub>O/Pentane);  $[\alpha]_D -81$  ( $c$  0.5, CHCl<sub>3</sub>); <sup>1</sup>H NMR (500 MHz, CDCl<sub>3</sub>)  $\delta$  7.31 (m, 2H), 7.20 (m, 3H), 5.12 (q, 1H,  $J = 5.0$ ), 4.95 (m, 1H), 3.94 (d, 1H,  $J = 4.7$ ), 2.82 (ddd, 1H,  $J = 14.1, 9.9, 5.4$ ), 2.68 (ddd, 1H,  $J = 13.9, 9.6, 6.8$ ), 1.93 (m, 2H), 1.79 (m, 1H), 1.69 (ddd, 1H,  $J = 13.7, 2.1, 1.5$ ), 1.38 (d, 3H,  $J = 5.1$ ) ppm; <sup>13</sup>C NMR (125 MHz, CDCl<sub>3</sub>)  $\delta$  141.2, 128.5, 128.3, 126.0, 117.4, 96.1, 72.3, 63.1, 37.0, 33.0, 30.9, 20.7; IR (neat) 2938, 1604, 1496, 1414, 1335, 1138 cm<sup>-1</sup> ppm; HRMS (CI/ammonia)  $m/z$  calcd for C<sub>14</sub>H<sub>18</sub>NO<sub>2</sub> [M]<sup>+</sup> 231.1259 found 231.1260.

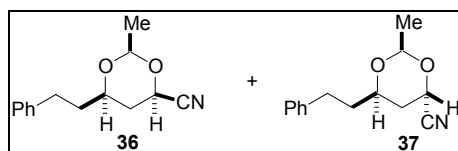

**cis- and trans- acetals 36 and 37.** Starting with  $\beta$ -hydroxy ester **33**, and the experimental procedure employed for the synthesis of acetals **31** and **32** led to the synthesis of acetals **36** and **37** in 78% overall yield (1:1.1 cis/trans) (contaminated with ~3-5% of the C2 epimer).

Cis isomer **36**:  $[\alpha]_D +31$  ( $c$  0.5, CHCl<sub>3</sub>);  $R_f$ , <sup>1</sup>H NMR, <sup>13</sup>C NMR, and IR spectra data were identical to that of acetal **31**.

Trans isomer **37**:  $[\alpha]_D +80$  ( $c$  0.5, CHCl<sub>3</sub>);  $R_f$ , <sup>1</sup>H NMR, <sup>13</sup>C NMR, and IR spectra data were identical to that of acetal **32**.

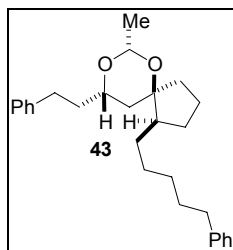

**Hydrogenation of alkene 41 to acetal 43.** To a solution of alkene **41** (19 mg, 47  $\mu\text{mol}$ ) in MeOH (1 mL) was added 10% Pd/C. The resulting mixture was kept under an atmosphere of  $\text{H}_2$  (1 atm of pressure) and allowed to stir at room temperature for 20 h. The solution was filtered through a plug of silica eluting with pentane, and the solution was concentrated under reduced pressure. The resulting oil was purified by flash chromatography (10%  $\text{Et}_2\text{O}$ /Pentane) to give 15 mg (79% yield) of the desired product (acetal **43**) as a colorless oil:  $R_f = 0.54$  (10%  $\text{Et}_2\text{O}$ /Pentane);  $[\alpha]_D -78$  ( $c$  1.7,  $\text{CHCl}_3$ );  $^1\text{H}$  NMR (500 MHz,  $\text{CDCl}_3$ )  $\delta$  7.29 (m, 4H), 7.20 (m, 6H), 4.67 (q, 1H,  $J = 5.1$ ), 3.72 (m, 1H), 2.80 (ddd, 1H,  $J = 14.0, 10.0, 5.7$ ), 2.69 (ddd, 1H,  $J = 13.9, 9.7, 6.6$ ) 2.62 (t, 2H,  $J = 7.8$ ), 2.00 (m, 1H), 1.87 (m, 2H), 1.74–1.62 (m, 6H), 1.55–1.47 (m, 2H), 1.46–1.29 (m, 9H), 1.24–1.16 (m, 1H), 1.04–0.97 (m, 1H) ppm;  $^{13}\text{C}$  NMR (125 MHz,  $\text{CDCl}_3$ )  $\delta$  142.8, 142.0, 128.5, 128.4, 128.3, 128.2, 125.8, 125.6, 95.1, 83.6, 72.5, 40.8, 40.3, 38.1, 37.6, 36.0, 31.6, 31.4, 29.6, 28.1, 27.8, 27.2, 21.4, 17.8 ppm; IR (neat) 2928, 1601, 1496, 1454, 1378, 1143  $\text{cm}^{-1}$ ; HRMS (ESI)  $m/z$  calcd for  $\text{C}_{28}\text{H}_{38}\text{O}_2\text{Na}$   $[\text{M} + \text{Na}]^+$  429.2769; found 429.2765.

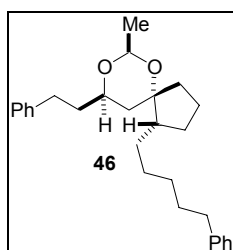

**Hydrogenation of mixture of alkenes to acetal 46.** The mixture comprised of olefin isomers **44** and **45** (6.0 mg, 15  $\mu\text{mol}$ ) were hydrogenated by using same experimental protocol developed

for the hydrogenation of alkene **41**. The reduced product **46** was isolated as a single diastereomer:  $R_f = 0.54$  (10% Et<sub>2</sub>O/Pentane);  $[\alpha]_D +66$  ( $c$  1.4, CHCl<sub>3</sub>); <sup>1</sup>H NMR, <sup>13</sup>C NMR, and IR spectra of acetal **46** were identical to the spectra of acetal **43**.

**References:**

1. Pangborn, A. B.; Giardello, M. A.; Grubbs, R. H.; Rosen, R. K.; Timmers, F. J. *Organometallics* **1996**, *15*, 1518–1520.
2. Matsumura, K.; Hashiguchi, S.; Ikariya, T.; Noyori, R. *J. Am. Chem. Soc.* **1997**, *119*, 8738–8739.
3. Haack, K.; Hashiguchi, S.; Fujii, A.; Ikariya, T.; Noyori, R. *Angew. Chem. Int. Ed. Engl.* **1997**, *36*, 285–290.
4. Dussault, P. H.; Eary, C. T.; Woller, K. R. *J. Org. Chem.* **1999**, *64*, 1789–1797.
5. Holmquist, C. R.; Roskamp, E. J. *J. Org. Chem.* **1989**, *54*, 3258–3260.
6. (a) Rychnovsky, S. D.; Sinz, C. J. *Tetrahedron Lett.* **1998**, *39*, 6811–6814. (b) Sumida, S.; Ohga, M.; Mitani, J.; Nokami, J. *J. Am. Chem. Soc.* **2000**, *122*, 310–313.

1H spectrum

ppm

7.26692  
7.27080  
7.27207  
7.2668E  
7.25715  
7.25404  
7.20885  
7.20834  
7.20590  
7.20181  
7.19220  
7.19034  
7.18971  
7.1761E  
7.17253

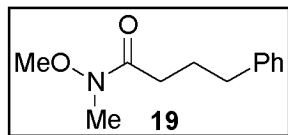

3.56848  
3.15247  
3.15205  
2.69480  
2.67984  
2.66425  
2.45104  
2.43712  
2.42305  
2.00919  
1.95984  
1.95382  
1.97877  
1.96335  
1.94875

Current Data Parameters  
USER Jacruz  
NAME TLVIP694  
EXPNO 1  
PROCNO 1

F2 - Acquisition Parameters  
Date\_ 20020808  
Time 9.17  
INSTRUM omega500  
PROBHD 5 mm broadband  
PULPROG zg30  
TD 65536  
SOLVENT CDCl3  
NS 8  
DS 2  
SWH 8012.820 Hz  
FIDRES 0.122266 Hz  
AQ 4.0894966 sec  
RG 16  
DN 62.400 usec  
DE 5.00 usec  
TE 300.0 K  
D1 0.10000000 sec

\*\*\*\*\* CHANNEL f1 \*\*\*\*\*  
NUC1 1H  
P1 13.00 usec  
PL1 -1.00 dB  
SFO1 500.2235015 MHz

F2 - Processing parameters  
S1 65536  
SF 500.2200218 MHz  
WDW no  
SSB 0  
LB 0.00 Hz  
GB 0  
PC 1.00

1D NMR plot parameters  
CX 22.80 cm  
F1P 10.000 ppm  
F1 5002.20 Hz  
F2P 0.000 ppm  
F2 0.00 Hz  
PPMCM 0.43860 ppm/cm  
HZCM 219.39476 Hz/cm

Integral

ppm

9

8

7

6

5

S13

4

3

2

1

1.9362

2.8152

2.8958

2.3283

2.1000

1.9542

2.1121

13C spectrum with 1H decoupling

ppm

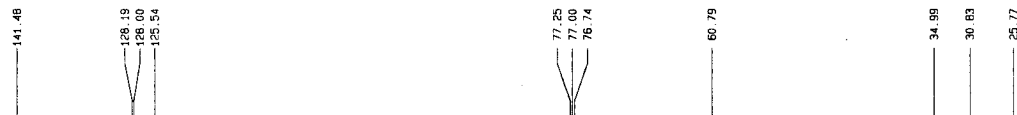

Current Data Parameters  
 USER lacruz  
 NAME TLV1PG94Carbon  
 EXPNO 1  
 PROCNO 1

F2 - Acquisition Parameters  
 Date\_ 20020808  
 Time 9.30  
 INSTRUM omegas500  
 PROBHD 5 mm broadband  
 PULPROG zgpg30  
 TD 65536  
 SOLVENT CDCl3  
 NS 512  
 DS 4  
 SWH 30303.031 Hz  
 FIDRES 0.462388 Hz  
 AQ 1.0813940 sec  
 RG 10321.3  
 DW 16.500 usec  
 DE 4.50 usec  
 TE 300.0 K  
 D1 0.25000000 sec  
 D11 0.03000000 sec

----- CHANNEL f1 -----  
 NUC1 13C  
 P1 29.00 usec  
 PL1 -3.00 dB  
 SF01 125.7942048 MHz

----- CHANNEL f2 -----  
 CPDPRG2 waltz16  
 NUC2 1H  
 PCPD2 80.00 usec  
 PL2 120.00 dB  
 PL12 14.40 dB  
 SF02 500.2230013 MHz

F2 - Processing parameters  
 S1 65536  
 SF 125.7804637 MHz  
 WGH EM  
 SSB 0  
 LB 1.00 Hz  
 GB 0  
 PC 1.00

1D NMR plot parameters  
 CX 22.80 cm  
 F1P 200.000 ppm  
 F1 25156.09 Hz  
 F2P 0.000 ppm  
 F2 0.00 Hz  
 PPMCM 8.77193 ppm/cm  
 HZCM 1103.33740 Hz/cm

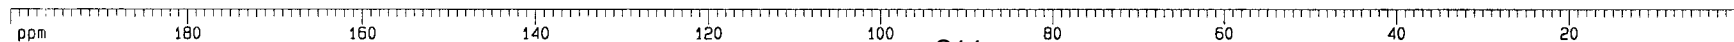

1H spectrum

ppm

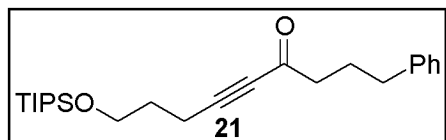

7.29506  
7.27976  
7.26284  
7.19556  
7.19464  
7.19334  
7.19236  
7.19076  
7.17962  
7.17642  
7.17114

3.79496  
3.78332  
3.77154

2.66972  
2.65450  
2.63928  
2.58448  
2.55956  
2.52253  
2.50834  
2.48416  
2.01988  
2.00471  
1.98955  
1.81794  
1.81552  
1.80378  
1.79206  
1.3027  
1.1860  
1.1275  
1.10105  
1.05195  
1.06156  
1.07036  
1.06070  
1.05422  
1.05662

Current Data Parameters  
USER lacruz  
NAME TLV1P095  
EXPNO 1  
PROCNO 1

F2 - Acquisition Parameters  
Date\_ 20020809  
Time 9.35  
INSTRUM omega500  
PROBHD 5 mm broadband  
PULPROG zg30  
TD 65536  
SOLVENT CDCl3  
NS 8  
DS 2  
SWH 8012.820 Hz  
FIDRES 0.122266 Hz  
AQ 4.0894966 sec  
RG 16  
DW 62.400 usec  
DE 6.00 usec  
TE 300.0 K  
D1 0.10000000 sec

===== CHANNEL f1 =====  
NUC1 1H  
P1 13.00 usec  
PL1 -1.00 dB  
SFO1 500.225015 MHz

F2 - Processing parameters  
SI 65536  
SF 500.2200310 MHz  
WDW no  
SSB 0  
LB 0.00 Hz  
GB 0  
PC 1.00

1D NMR plot parameters  
CX 22.80 cm  
F1P 10.000 ppm  
F1 5002.20 Hz  
F2P 0.000 ppm  
F2 0.00 Hz  
PRMCM 0.43860 ppm/cm  
HZCM 219.39476 Hz/cm

ppm

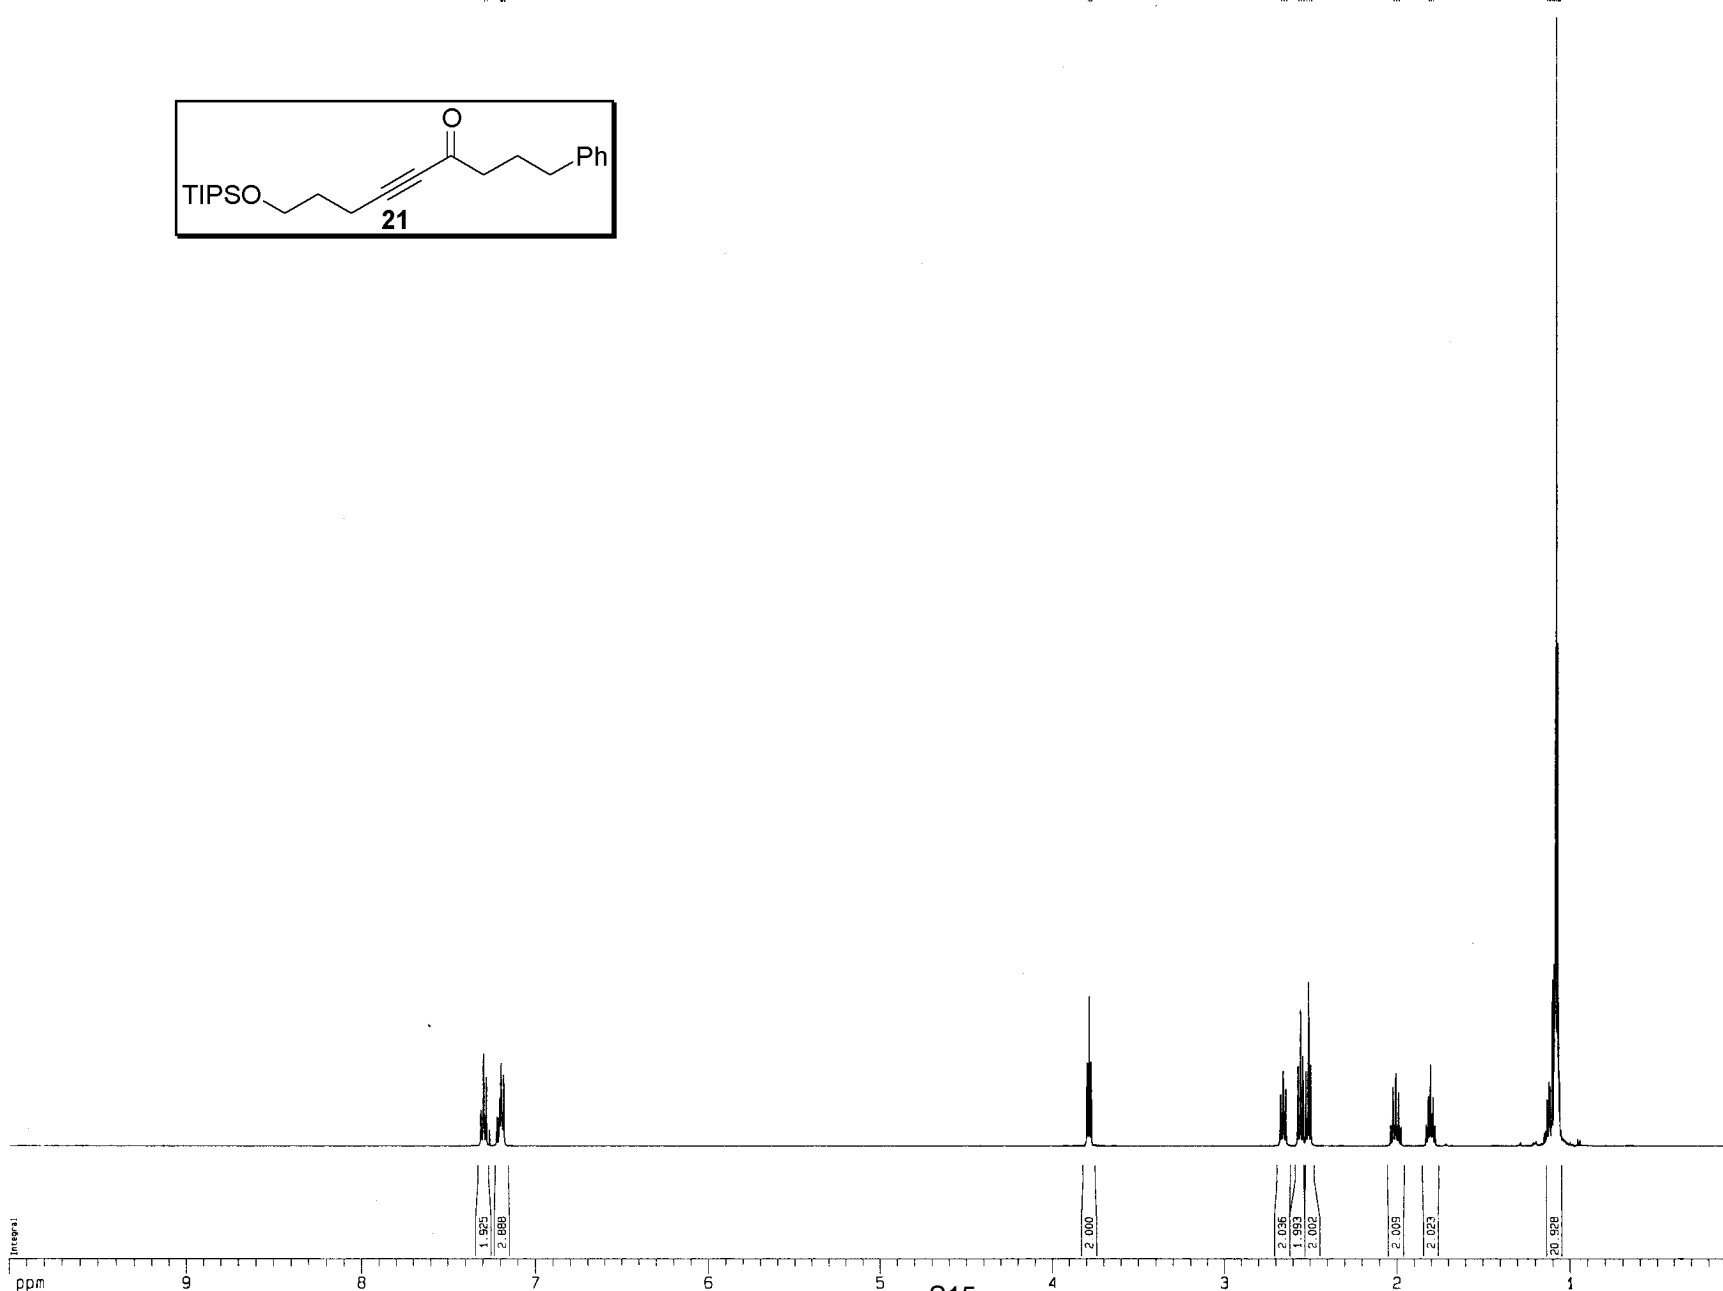

S15

<sup>13</sup>C spectrum with <sup>1</sup>H decoupling

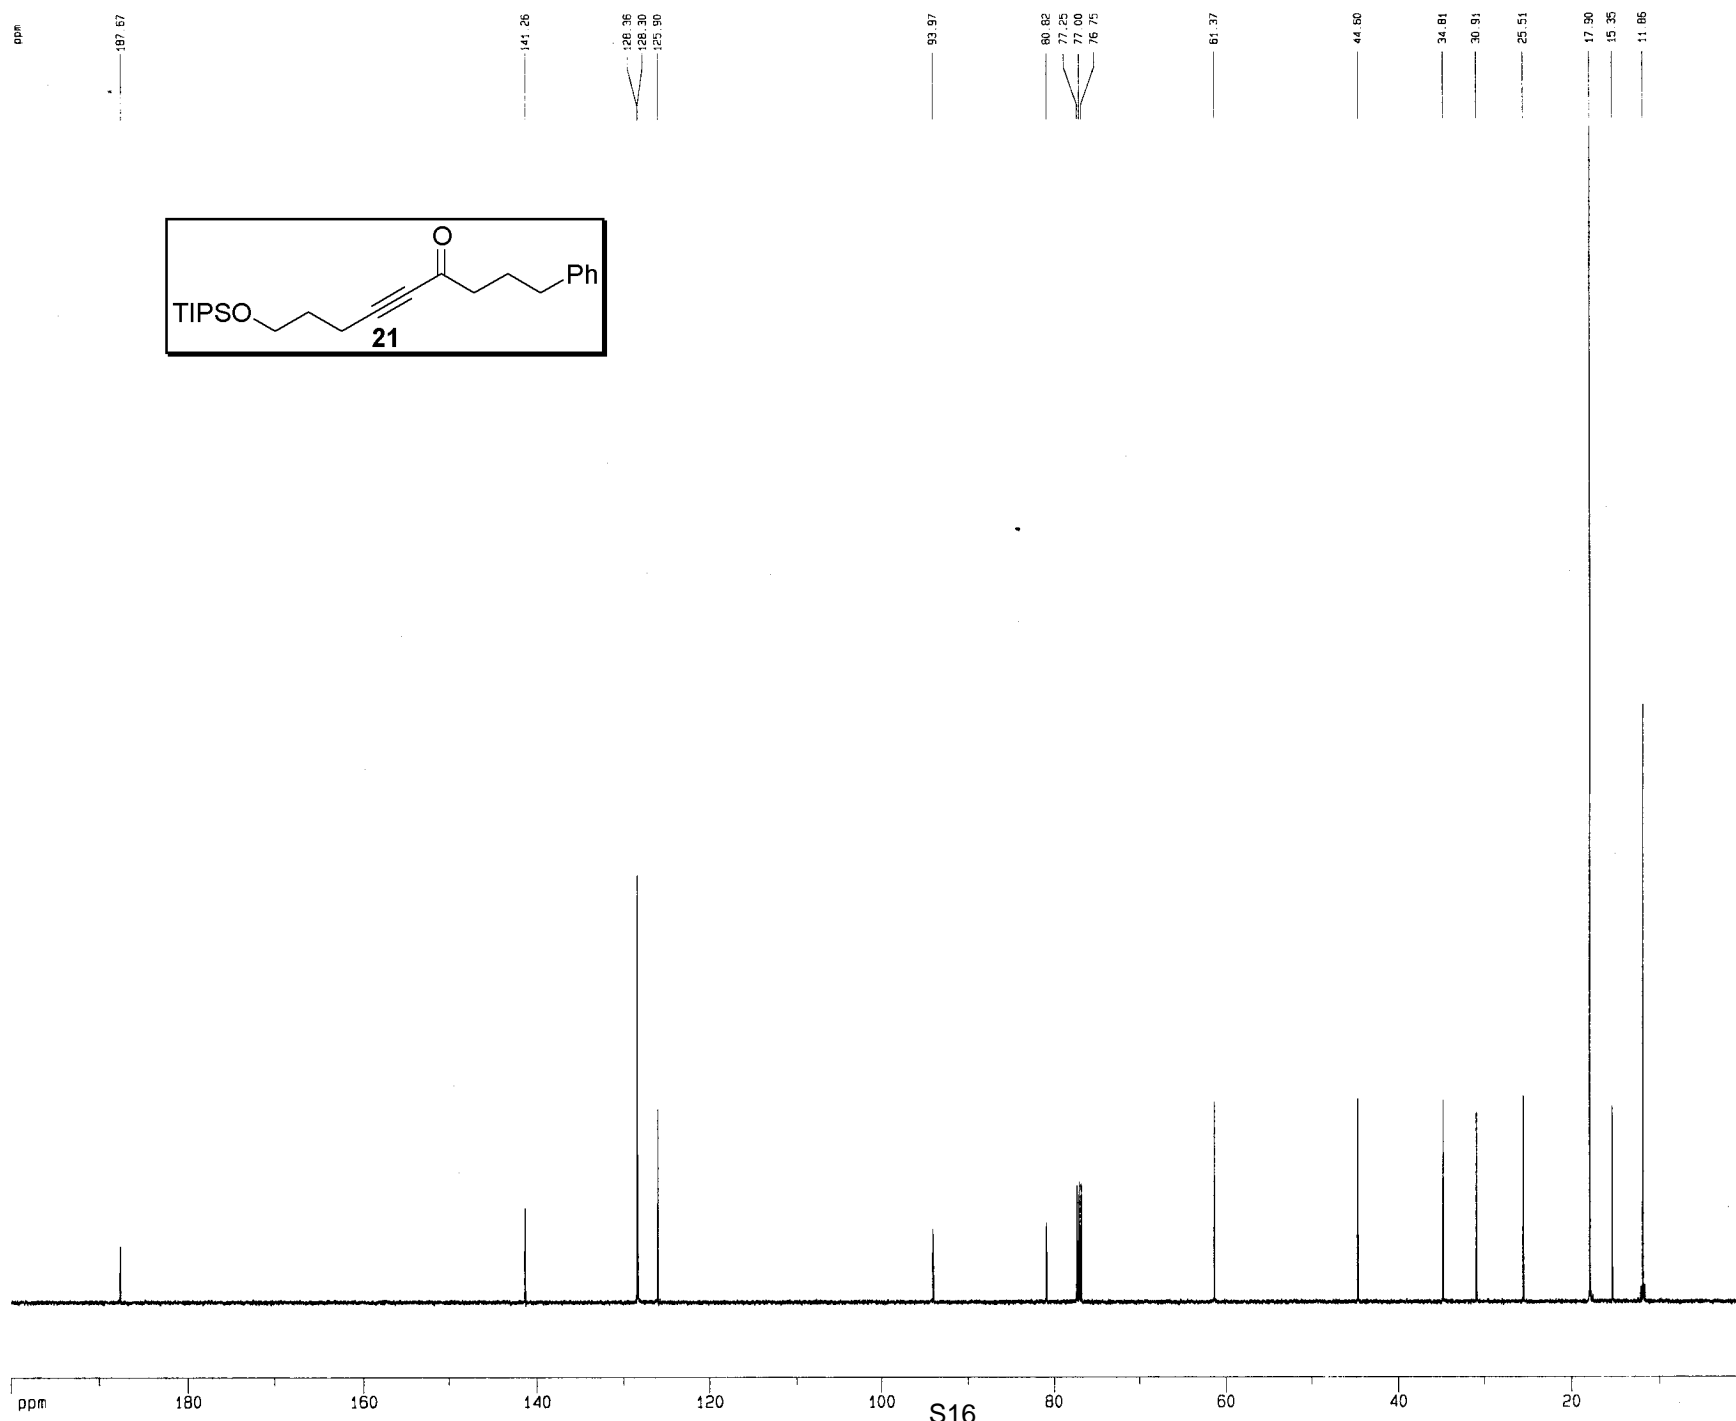

```

Current Data Parameters
USER          lacruz
NAME         TLV1P695Carbon
EXPNO        1
PROCNO       1

F2 - Acquisition Parameters
Date_        20020809
Time         9.49
INSTRUM      omega500
PROBHD       5 mm broadband
PULPROG      zgpg30
TD           65536
SOLVENT      CDCl3
NS           512
DS           4
SWH          30303.031 Hz
FIDRES       0.462388 Hz
AQ           1.0813940 sec
RG           7298.2
DW           16.500 usec
DE           4.50 usec
TE           300.0 K
D1           0.25000000 sec
D11          0.03000000 sec

----- CHANNEL f1 -----
NUC1         13C
P1           29.00 usec
PL1          -3.00 dB
SFO1        125.7942048 MHz

***** CHANNEL f2 *****
CPDPRG2      waltz16
NUC2         1H
PCPD2        80.00 usec
PL2          120.00 dB
PL12         14.40 dB
SFO2        500.2230013 MHz

F2 - Processing parameters
SI           65536
SF           125.7804392 MHz
WDW          EM
SSB          0
LB           1.00 Hz
GB           0
PC           1.00

1D NMR plot parameters
CX           22.80 cm
F1P          200.000 ppm
F1           25156.09 Hz
F2P          0.000 ppm
F2           0.00 Hz
PPMCM        8.77193 ppm/cm
HZCM         1103.33728 Hz/cm
    
```



1H spectrum

ppm

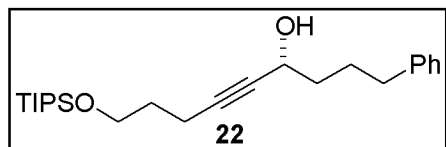

7.30397  
7.26912  
7.26741  
7.27386  
7.20677  
7.19204

3.77767  
3.76556  
3.75348

2.66023  
2.66554  
2.65035  
2.35290  
2.34930  
2.33971  
2.35005  
2.32454  
2.32099  
1.81406  
1.79943  
1.78620  
1.75117  
1.74980  
1.73700  
1.73139  
1.72488  
1.71682  
1.12334  
1.11154  
1.10572  
1.09432  
1.07745  
1.07517  
1.06594  
1.05395

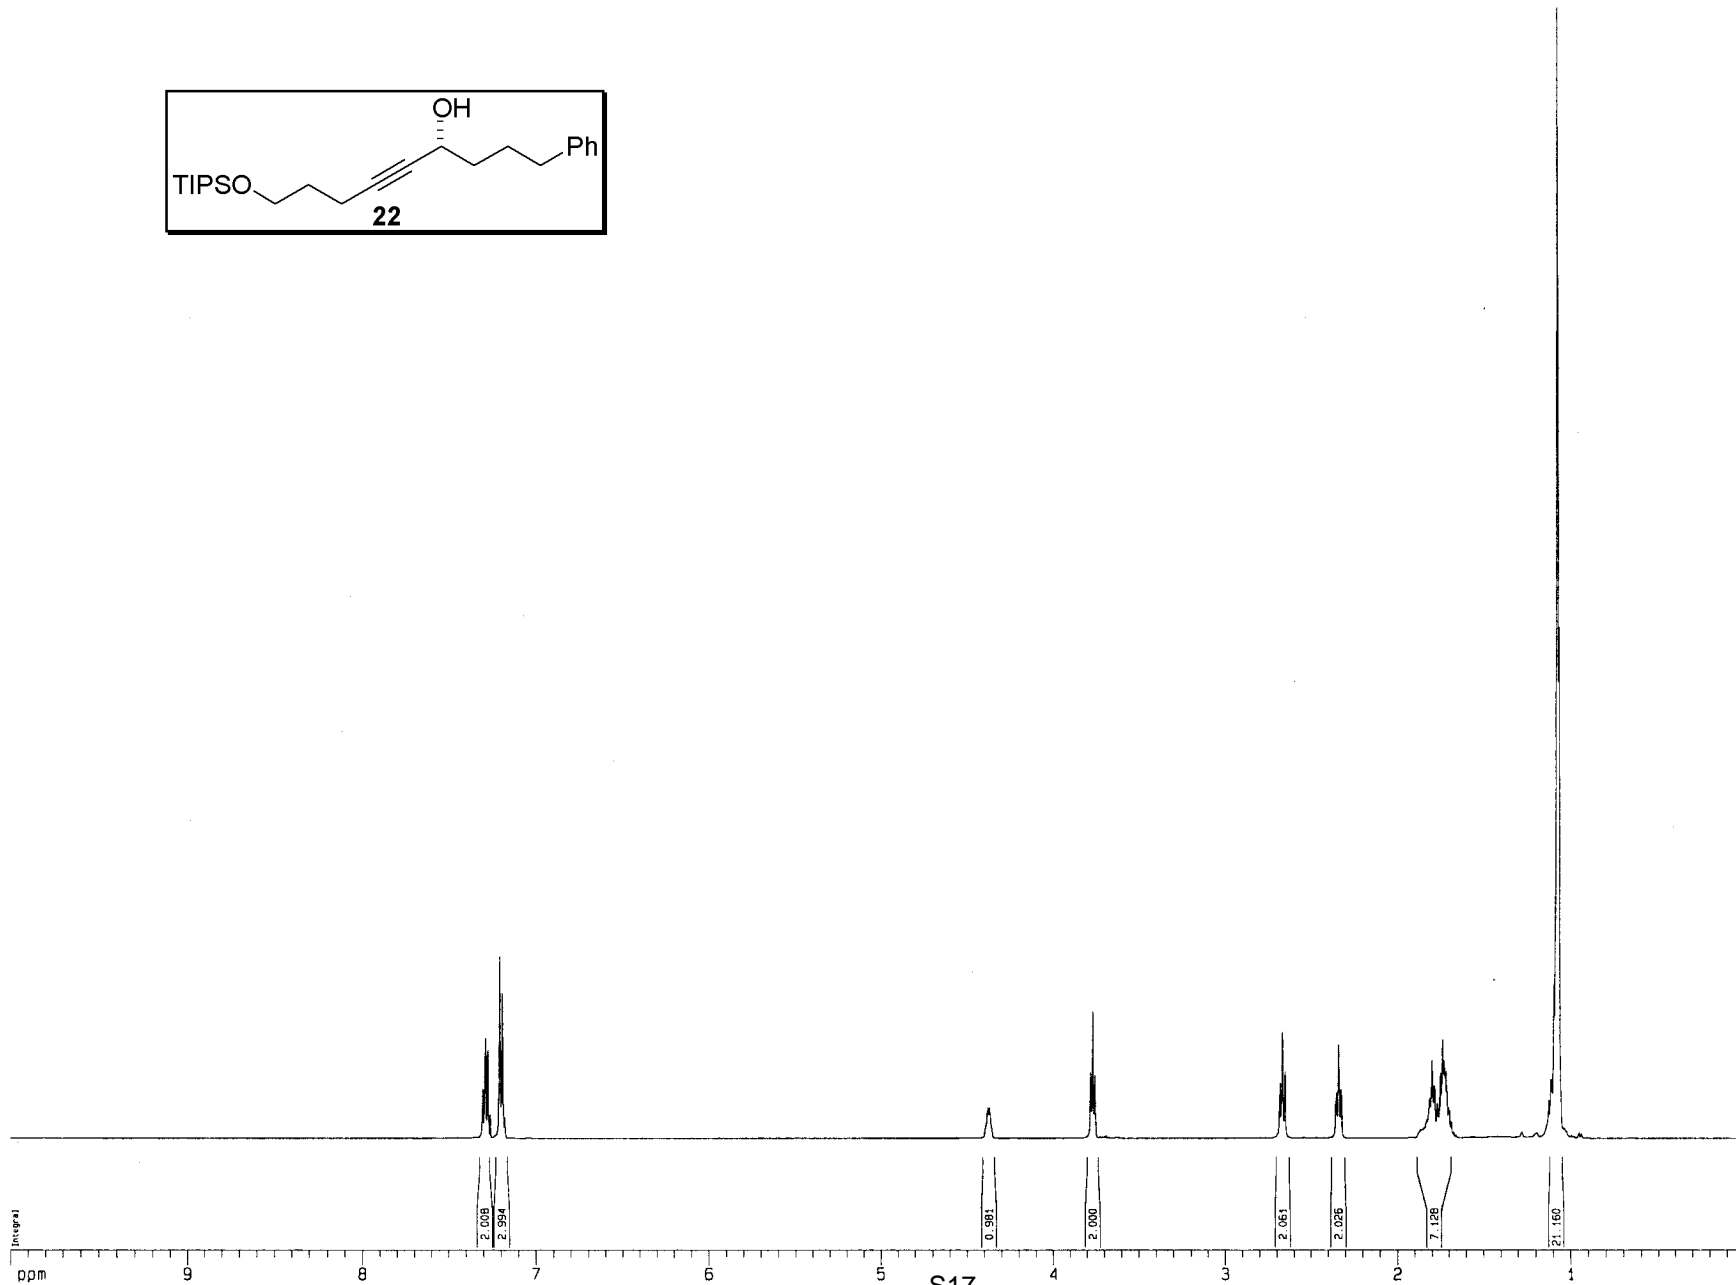

Current Data Parameters  
USER lacruz  
NAME TLV1P699  
EXPNO 1  
PROCNO 1

F2 - Acquisition Parameters  
Date\_ 20020813  
Time 19.50  
INSTRUM omegaeo0  
PROBHD 5 mm broadband  
PULPROG zg30  
TD 65536  
SOLVENT CDCl3  
NS 16  
DS 2  
SWH 6012.820 Hz  
FIDRES 0.122266 Hz  
AQ 4.0894966 sec  
RG 32  
DN 62.400 usec  
DE 6.000 usec  
TE 300.0 K  
D1 0.10000000 sec

\*\*\*\*\* CHANNEL f1 \*\*\*\*\*  
NUC1 1H  
P1 13.00 usec  
PL1 -1.00 dB  
SFO1 500.2235015 MHz

F2 - Processing parameters  
SI 65536  
SF 500.2200310 MHz  
WDW no  
SSB 0  
LB 0.00 Hz  
GB 0  
PC 1.00

1D NMR plot parameters  
CX 22.80 cm  
F1P 10.000 ppm  
F1 5002.20 Hz  
F2P 0.000 ppm  
F2 0.00 Hz  
PPMCH 0.43860 ppm/cm  
HZCH 219.39476 Hz/cm

13C spectrum with 1H decoupling

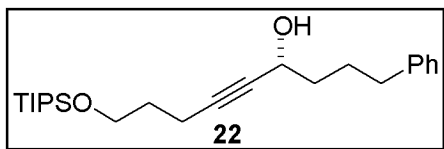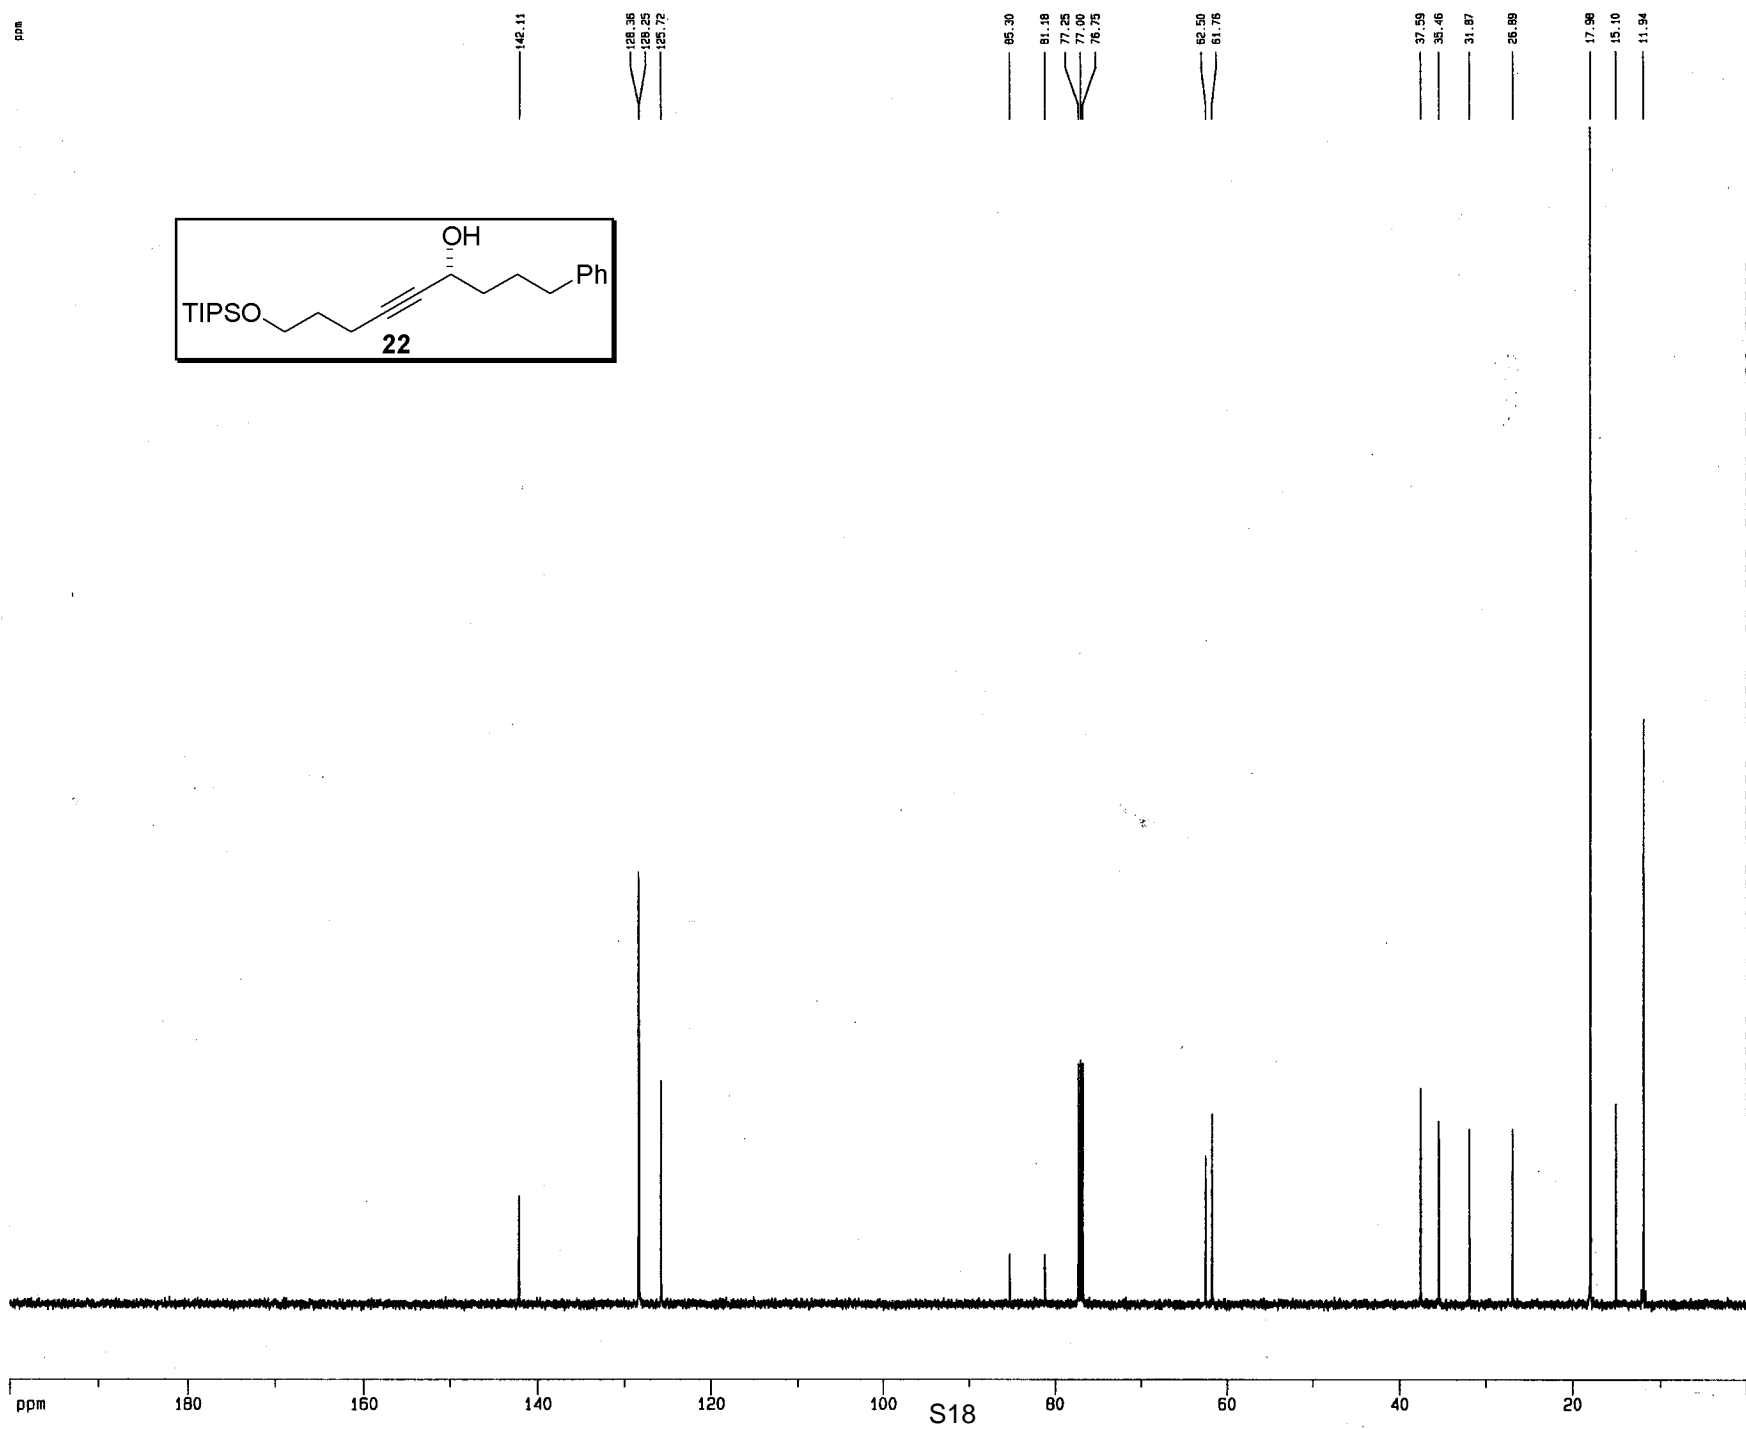

```

Current Data Parameters
USER          Jacruz
NAME         TLV1P699Carbon
EXPNO        1
PROCNO       1

F2 - Acquisition Parameters
Date_        20020813
Time         19.42
INSTRUM      oegs500
PROBHD       5 mm broadban
PULPROG      zgpg30
TD           65536
SOLVENT      CDCl3
NS           512
DS           4
SMH          30303.031 Hz
FIDRES       0.462388 Hz
AQ           1.0813940 sec
RG           7298.2
DN           16.500 usec
DE           4.50 usec
TE           300.0 K
D1           0.25000000 sec
D11          0.03000000 sec

----- CHANNEL f1 -----
NUC1         13C
P1           29.00 usec
PL1          -3.00 dB
SFO1        125.7842048 MHz

----- CHANNEL f2 -----
CPOPRG2     waltz16
NUC2         1H
PCPD2       80.00 usec
PL2         120.00 dB
PL12        14.40 dB
SFO2        500.2230013 MHz

F2 - Processing parameters
SI           65536
SF           125.7804332 MHz
WDW          EM
SSB          0
LB           1.00 Hz
GB           0
PC           1.00

ID NMR plot parameters
CX           22.80 cm
F1P         200.000 ppm
F1           25156.09 Hz
F2P         0.000 ppm
F2           0.00 Hz
PPMCM       8.77193 ppm/cm
HZCM        1103.33716 Hz/cm
    
```

1H spectrum

ppm

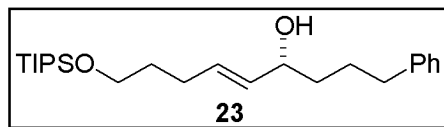

7.28710  
7.27218  
7.19580  
7.18076  
7.18415

3.71559  
3.70882  
3.69006

2.64756  
2.63248

2.14113  
2.12650

1.65212  
1.63918  
1.63689  
1.62386  
1.59667

1.11766  
1.11092  
1.09989  
1.09189  
1.08408  
1.07504  
1.06757

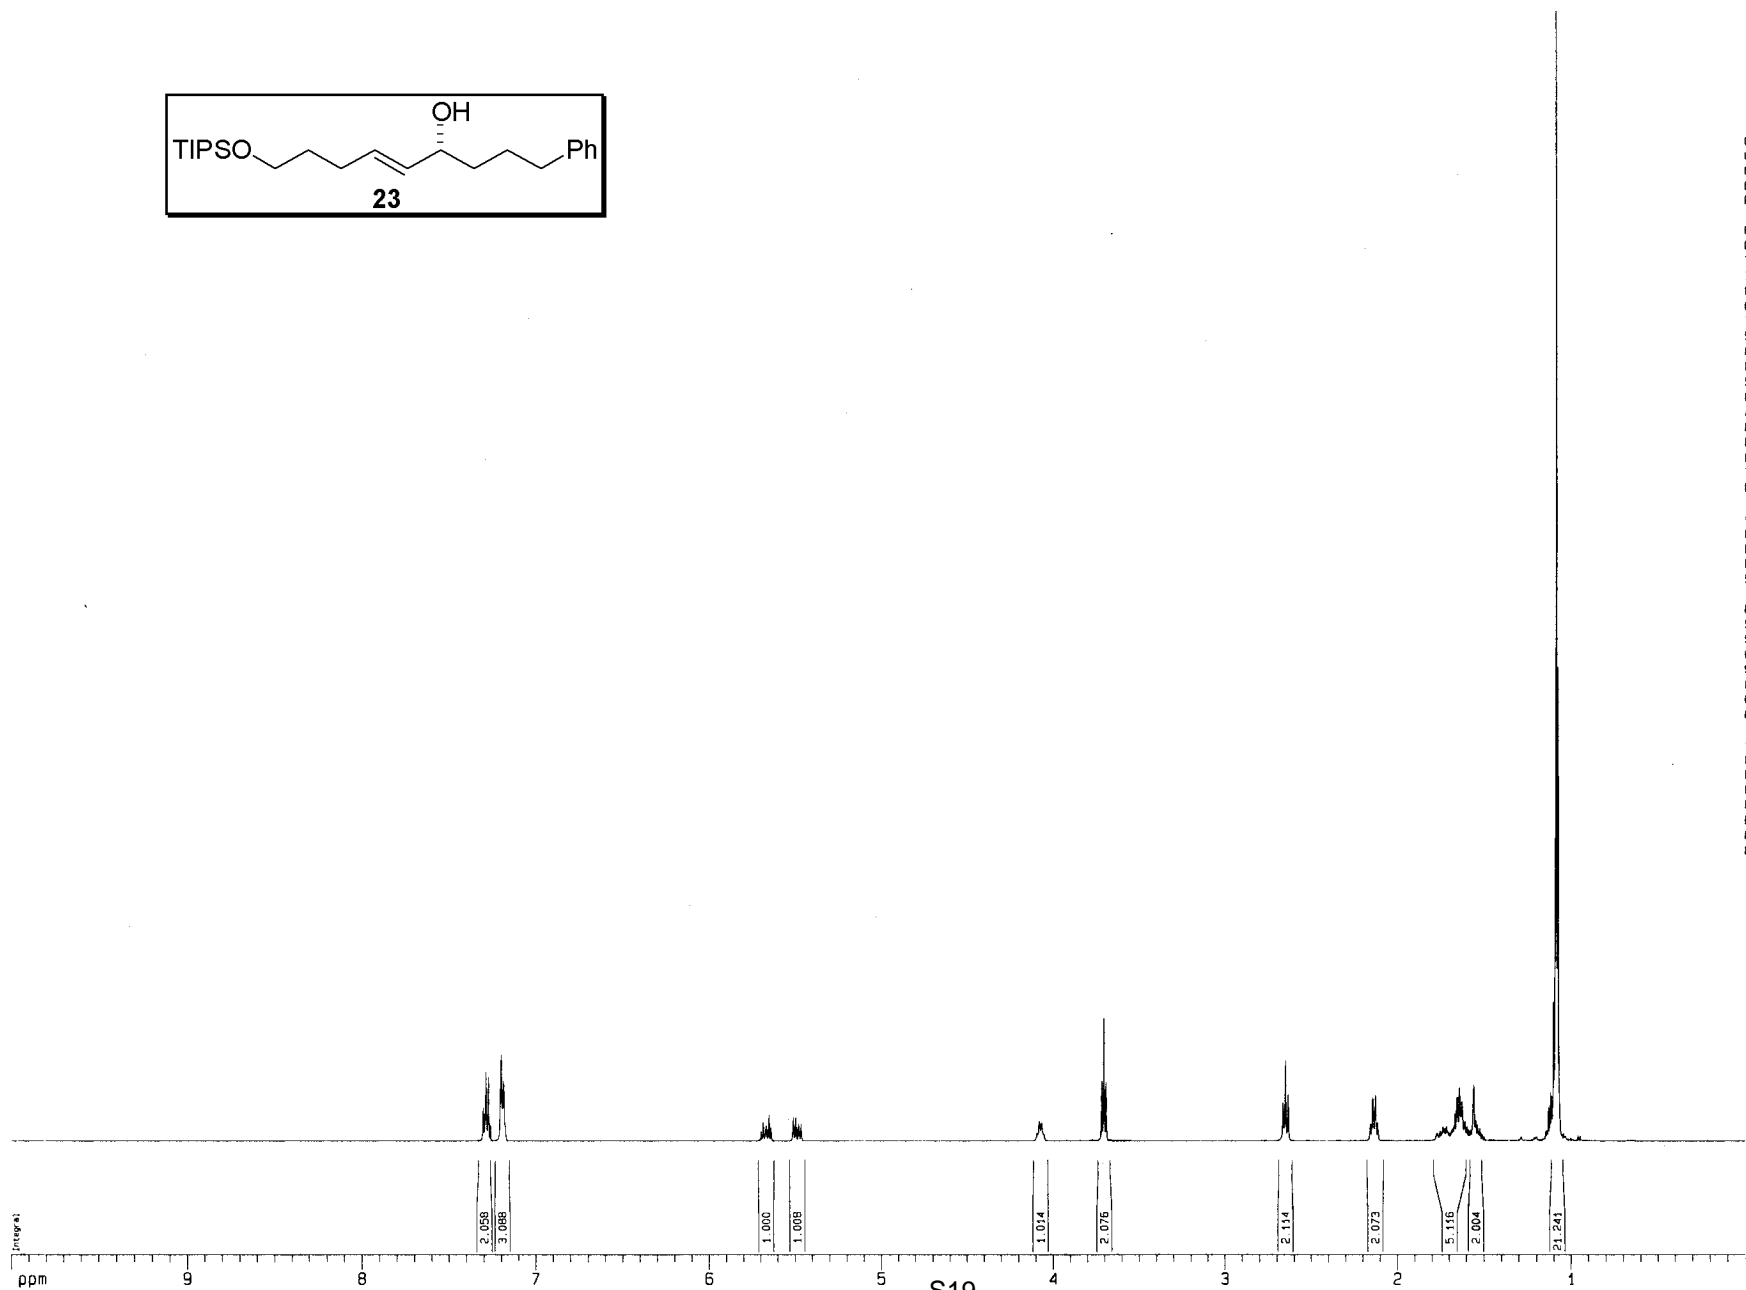

Current Data Parameters  
 USER iacruz  
 NAME TL1PG110  
 EXPNO 1  
 PROCNO 1

F2 - Acquisition Parameters  
 Date\_ 20020828  
 Time 19.11  
 INSTRUM omega500  
 PROBHD 5 mm broadband  
 PULPROG zg30  
 TD 65536  
 SOLVENT CDCl3  
 NS 8  
 DS 2  
 SWH 8012.820 Hz  
 FIDRES 0.122266 Hz  
 AQ 4.0894966 sec  
 RG 32  
 DM 62.400 usec  
 DE 6.00 usec  
 TE 300.0 K  
 D1 0.10000000 sec

\*\*\*\*\* CHANNEL f1 \*\*\*\*\*  
 NUC1 1H  
 P1 13.00 usec  
 PL1 -1.00 dB  
 SF01 500.2235015 MHz

F2 - Processing parameters  
 S1 65536  
 SF 500.2200306 MHz  
 WDW no  
 SSB 0  
 LB 0.00 Hz  
 GB 0  
 PC 1.00

1D NMR plot parameters  
 CX 22.80 cm  
 F1P 10.000 ppm  
 F1 5002.20 Hz  
 F2P 0.000 ppm  
 F2 0.00 Hz  
 PRNCD 0.43860 ppm/cm  
 HZCM 219.39476 Hz/cm



1H spectrum

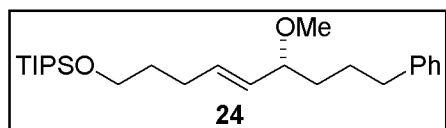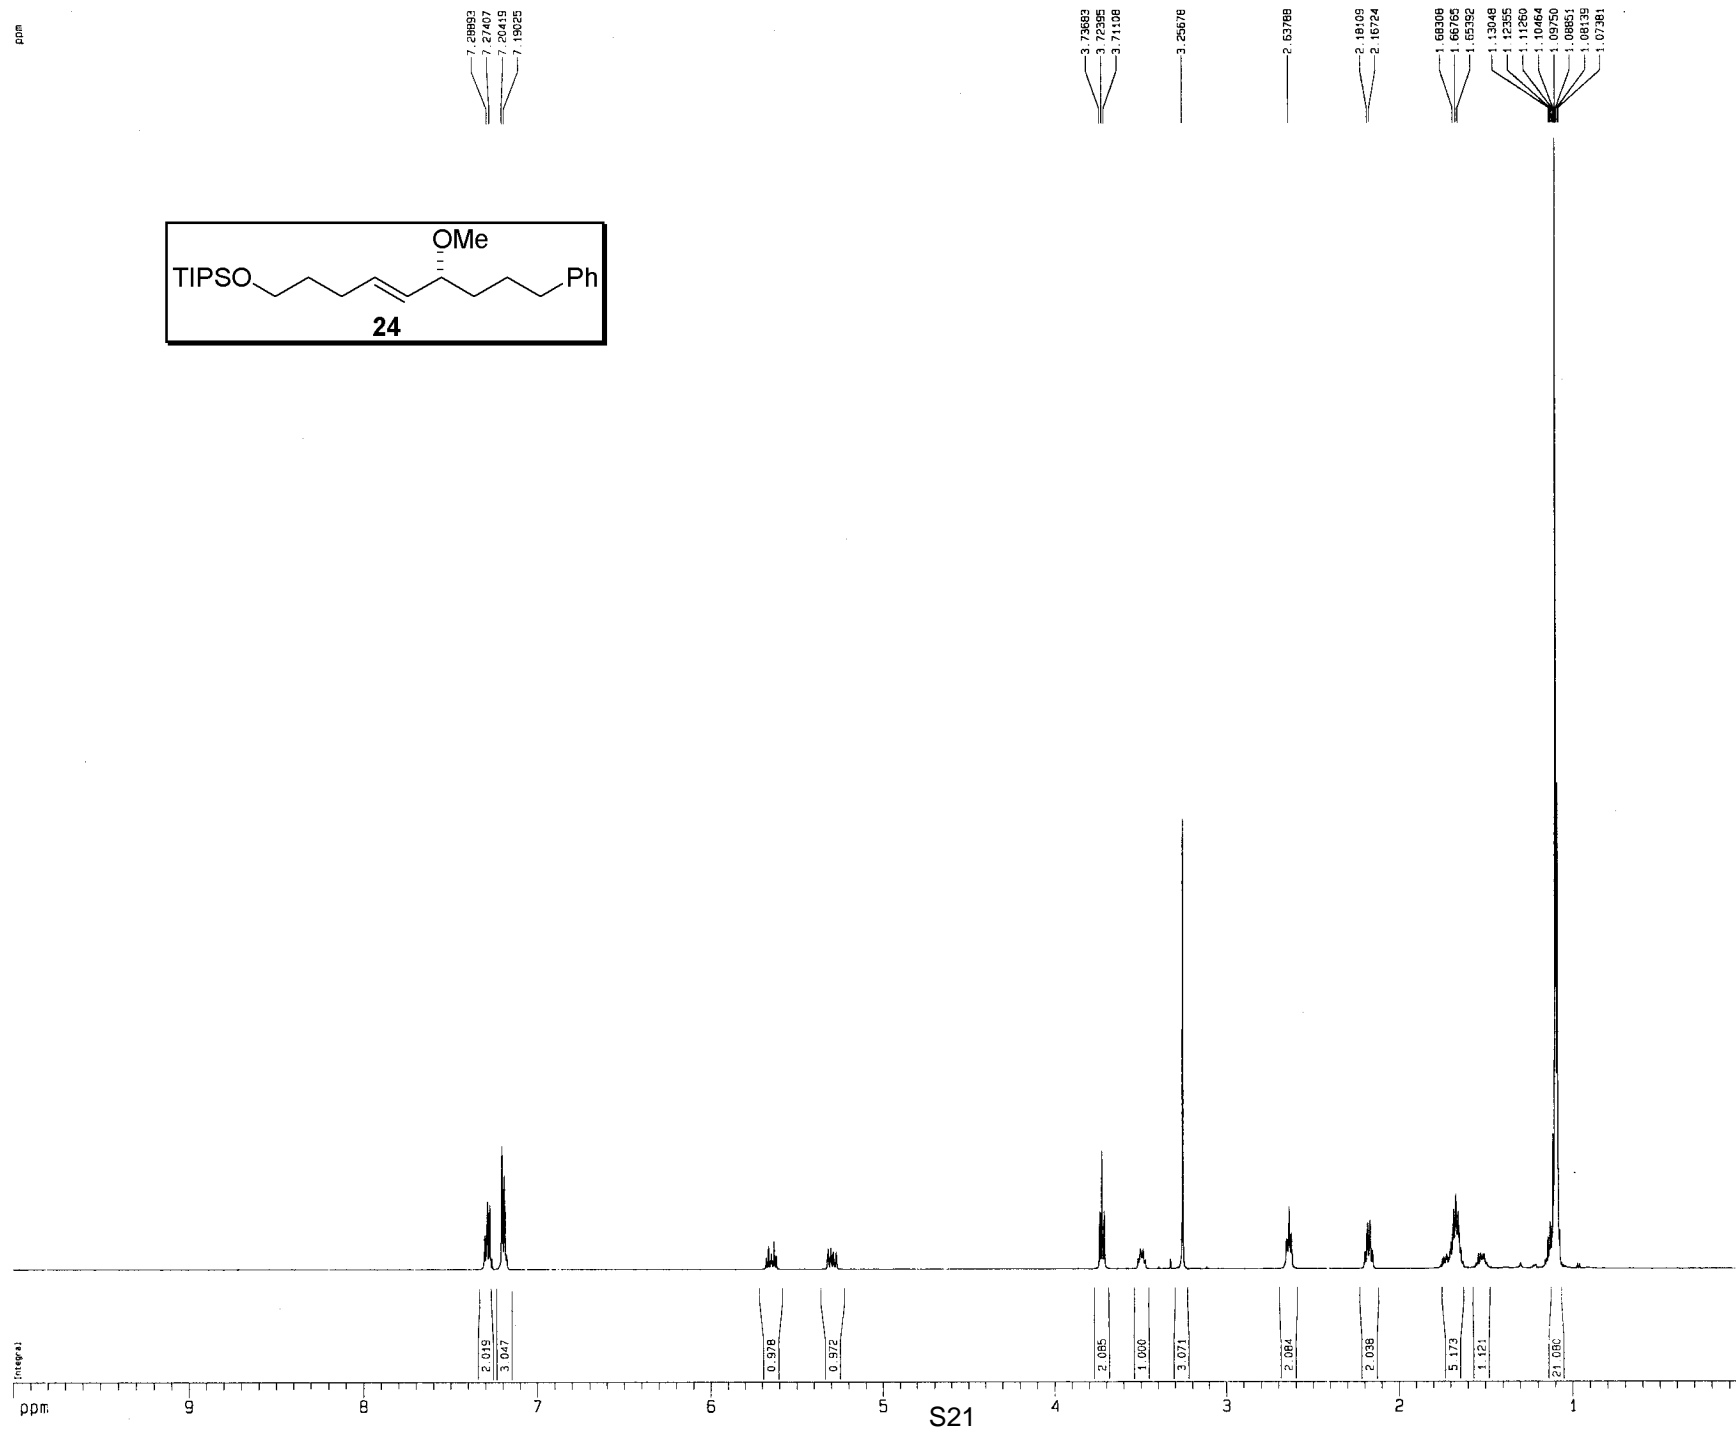

Current Data Parameters  
 USER Jacruz  
 NAME TL1PG114  
 EXPNO 1  
 PROCNO 1

F2 - Acquisition Parameters  
 Date\_ 20020902  
 Time 17.43  
 INSTRUM omega500  
 PROBHD 5 mm broadband  
 FULPROG zg30  
 TD 65536  
 SOLVENT CDC13  
 NS 8  
 DS 2  
 SWH 8012.820 Hz  
 FIDRES 0.122266 Hz  
 AQ 4.0894966 sec  
 RG 16  
 DW 62.400 usec  
 DE 6.00 usec  
 TE 300.0 K  
 D1 0.10000000 sec

===== CHANNEL f1 =====  
 NUC1 1H  
 P1 13.00 usec  
 PL1 -1.00 dB  
 SF01 500.2235015 MHz

F2 - Processing parameters  
 SI 65536  
 SF 500.2200311 MHz  
 WDW no  
 SSB 0  
 LB 0.00 Hz  
 GB 0  
 PC 1.00

1D NMR plot parameters  
 CX 22.80 cm  
 F1P 10.000 ppm  
 F1 5002.20 Hz  
 F2P 0.000 ppm  
 F2 0.00 Hz  
 RRMCH 0.43860 ppm/cm  
 HZCM 219.39476 Hz/cm

<sup>13</sup>C spectrum with <sup>1</sup>H decoupling

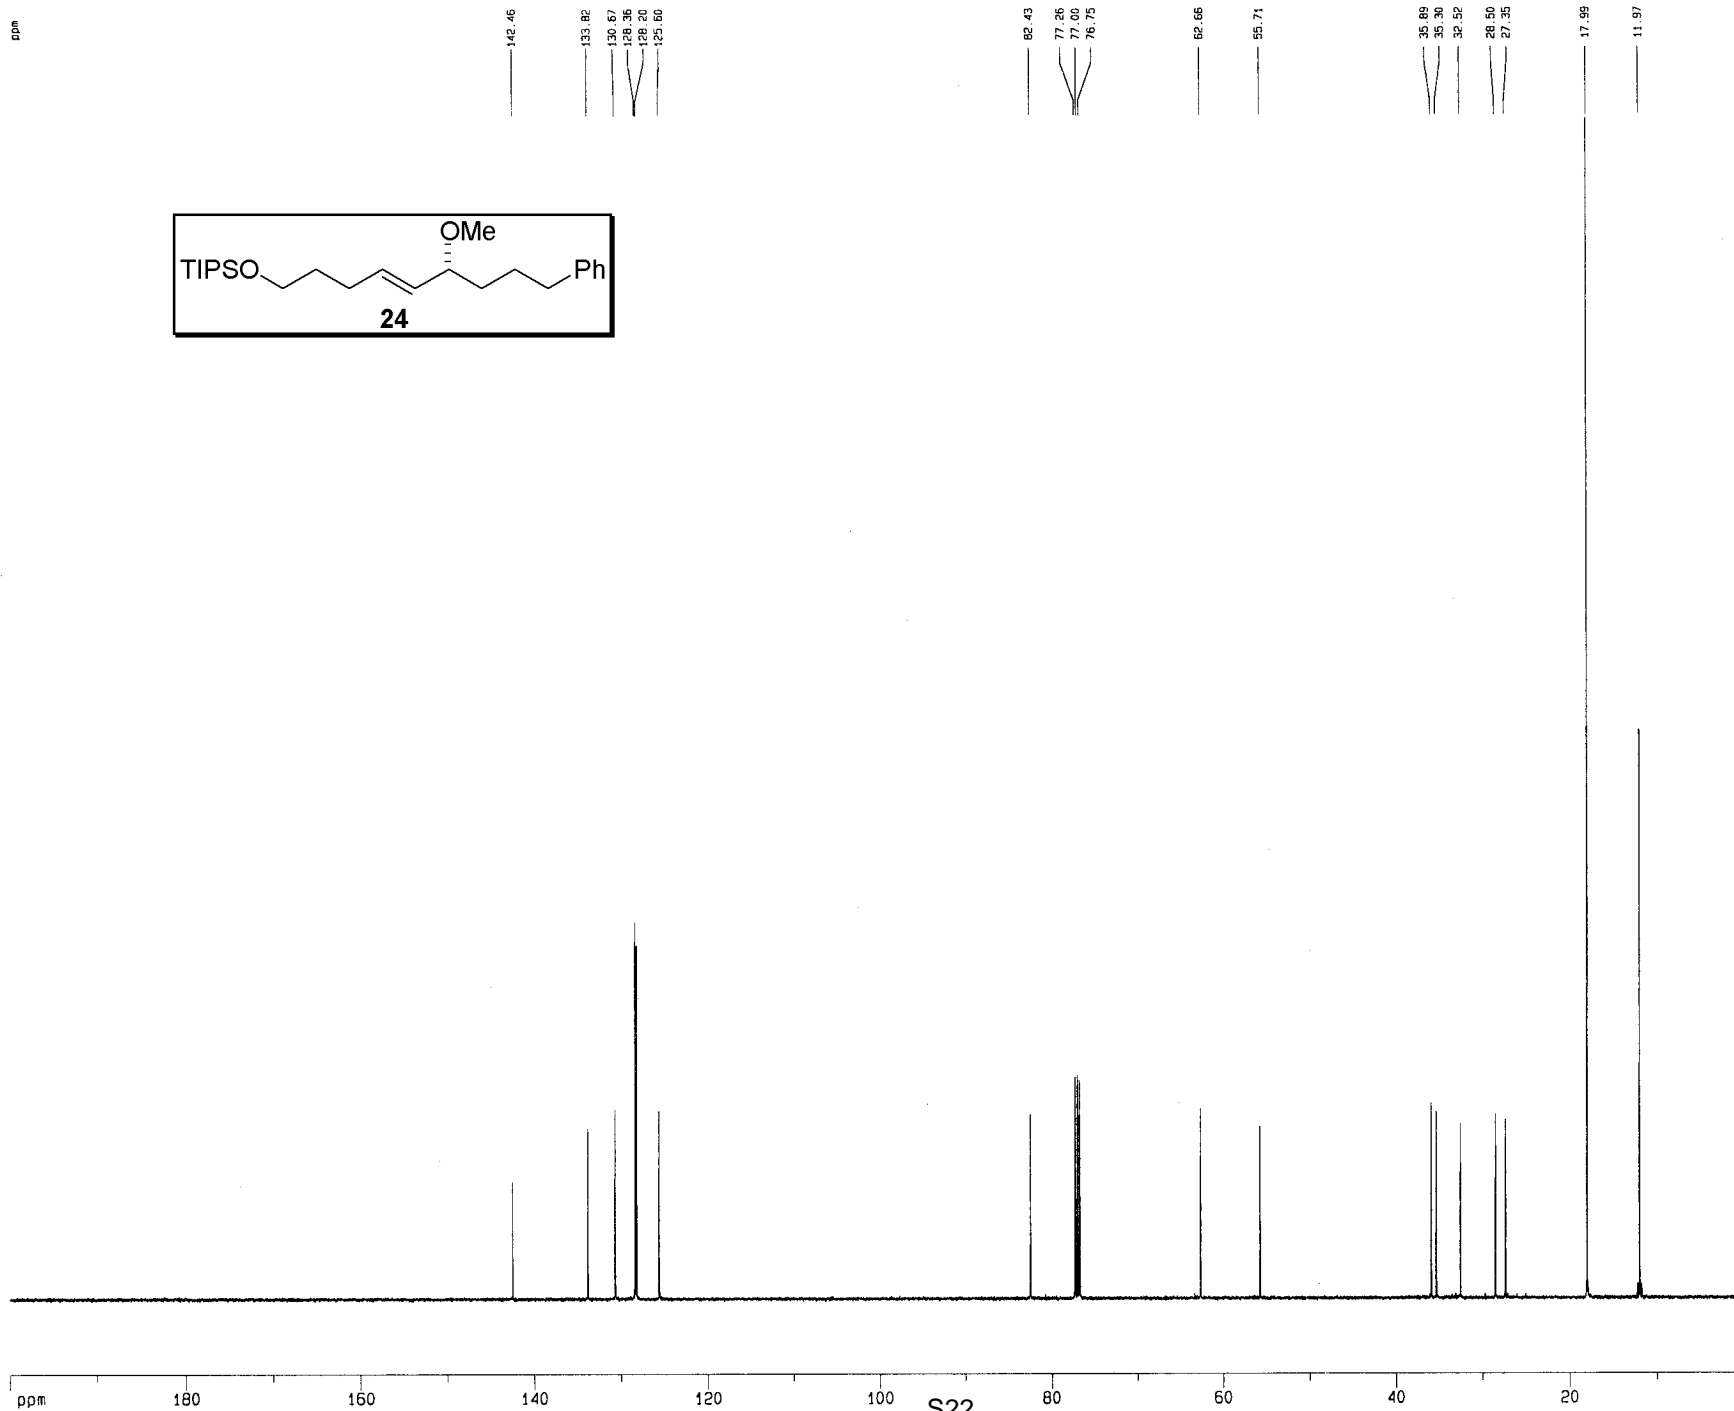

Current Data Parameters  
 USER Jacruz  
 NAME TL1PG14Carbon  
 EXPNO 1  
 PROCNO 1

F2 - Acquisition Parameters  
 Date\_ 20020902  
 Time 18 07  
 INSTRUM omeg500  
 PROBHD 5 mm broadband  
 PULPROG zgpg30  
 TD 65536  
 SOLVENT CDCl3  
 NS 1024  
 DS 4  
 SWH 30303.031 Hz  
 FIDRES 0.462366 Hz  
 AQ 1.0813940 sec  
 RG 2580.3  
 DW 16.500 usec  
 DE 4.50 usec  
 TE 300.0 K  
 D1 0.25000000 sec  
 D11 0.03000000 sec

----- CHANNEL f1 -----  
 NUC1 <sup>13</sup>C  
 P1 29.00 usec  
 PL1 -3.00 dB  
 SF01 125.7942048 MHz

----- CHANNEL f2 -----  
 CPOPRG2 waltz16  
 NUC2 <sup>1</sup>H  
 PCPD2 80.00 usec  
 PL2 120.00 dB  
 PL12 14.40 dB  
 SF02 500.2230013 MHz

F2 - Processing parameters  
 S1 65536  
 SF 125.7804341 MHz  
 WDW EM  
 SSB 0  
 LB 1.00 Hz  
 GB 0  
 PC 1.00

1D NMR plot parameters  
 CX 22.80 cm  
 F1P 200.000 ppm  
 F1 25156.09 Hz  
 F2P 0.000 ppm  
 F2 0.00 Hz  
 PPMCM 8.77193 ppm/cm  
 HZCM 1103.33716 Hz/cm

1H spectrum

ppm

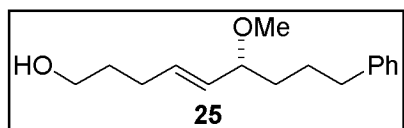

7.25064  
7.27570  
7.27400  
7.26029  
7.18981  
7.18670  
7.18427  
7.18067  
7.17611  
7.17289  
7.17093  
7.16957  
7.16839

5.60568  
5.31585  
5.29225

3.63090  
3.23842

2.63301  
2.61872  
2.60378

2.15411  
2.14089  
1.99986  
1.67530  
1.66908  
1.66007  
1.65550  
1.64863  
1.64311  
1.63207

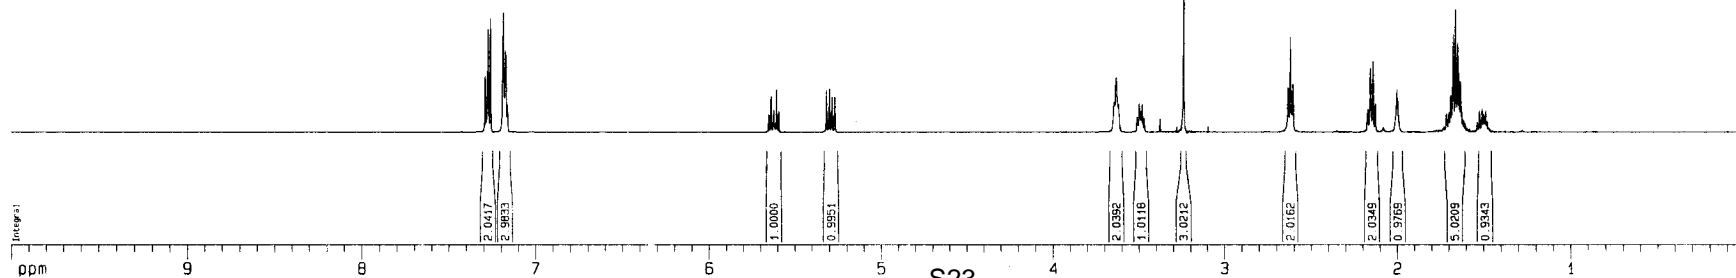

Current Data Parameters  
 USER lacruz  
 NAME TL1PG115  
 EXPNO 1  
 PROCNO 1

F2 - Acquisition Parameters  
 Date\_ 20020909  
 Time 22.57  
 INSTRUM omega500  
 PROBHD 5 mm broadband  
 PULPROG zg30  
 TO 65536  
 SOLVENT CDCl3  
 NS 8  
 DS 2  
 SWH 8012.820 Hz  
 FIDRES 0.122266 Hz  
 AQ 4.0894966 sec  
 RG 32  
 DN 62.400 usec  
 DE 6.00 usec  
 TE 300.0 K  
 D1 0.10000000 sec

===== CHANNEL f1 =====  
 NUC1 1H  
 P1 13.00 usec  
 PL1 -1.00 dB  
 SF01 500.2235015 MHz

F2 - Processing parameters  
 SI 65536  
 SF 500.2200307 MHz  
 MDX no  
 SSB 0  
 LB 0.00 Hz  
 GB 0  
 PC 1.00

1D NMR plot parameters  
 CX 22.80 cm  
 F1P 10.000 ppm  
 F1 5002.20 Hz  
 F2P 0.000 ppm  
 F2 0.00 Hz  
 SFO1 0.43850 ppm/cm  
 HZCW 219.39475 Hz/cm

<sup>13</sup>C spectrum with <sup>1</sup>H decoupling

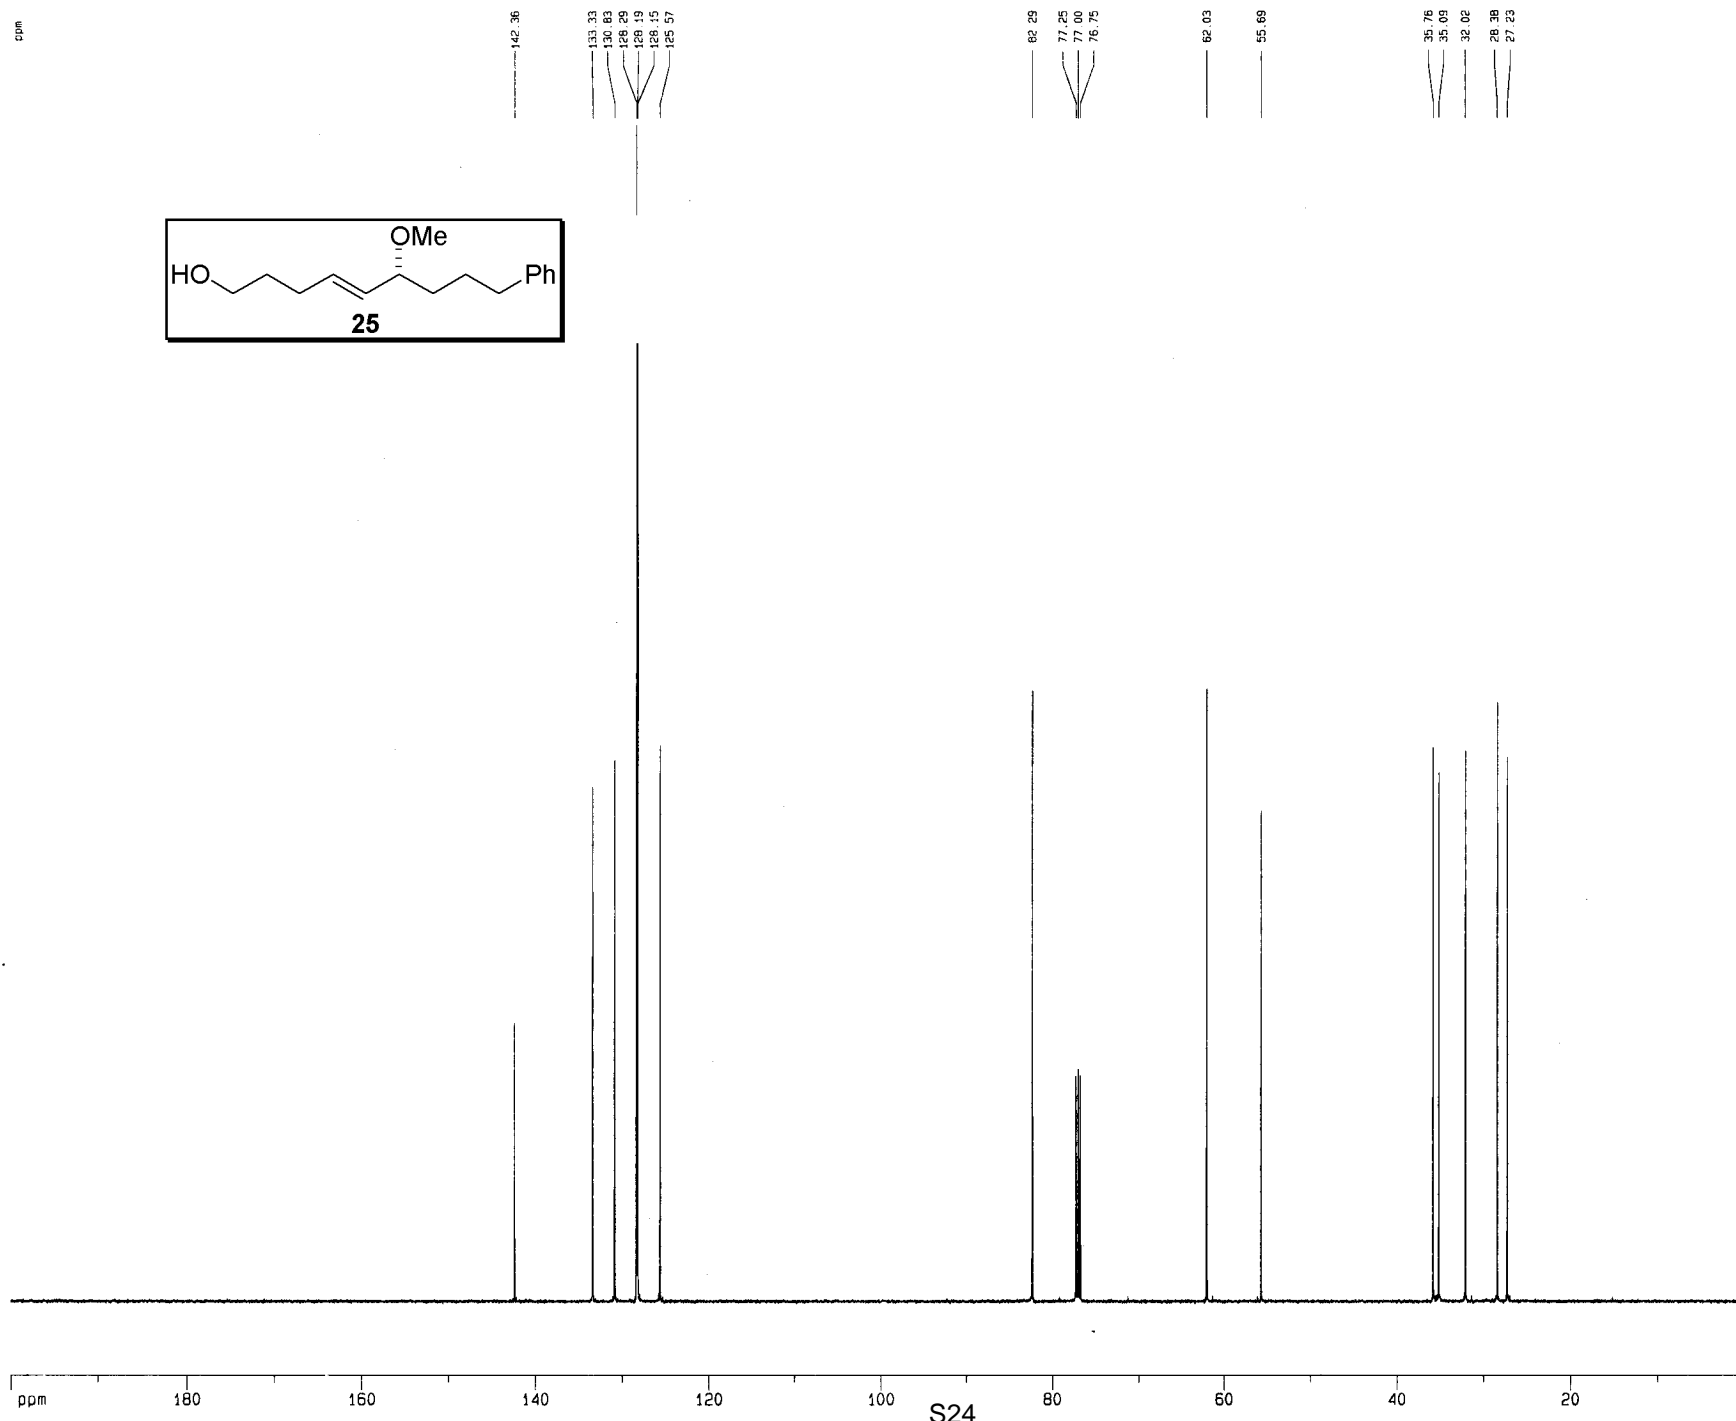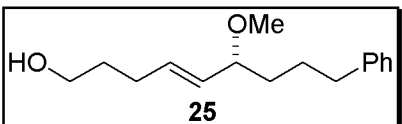

```

Current Data Parameters
USER      lacruz
NAME      TL1PG115Carbon
EXPNO     1
PROCNO    1

F2 - Acquisition Parameters
Date_     20020909
Time      23.21
INSTRUM   omega500
PROBHD    5 mm broadband
PULPROG   zgpg30
TD         65536
SOLVENT   CDCl3
NS         2048
DS         4
SWH        30303.031 Hz
FIDRES     0.462388 Hz
AQ         1.0813940 sec
RG         5160.6
DW         16.500 usec
DE         4.50 usec
TE         300.0 K
D1         0.25000000 sec
D11        0.03000000 sec

----- CHANNEL f1 -----
NUC1       13C
P1         29.00 usec
PL1        -3.00 dB
SF01       125.7942048 MHz

----- CHANNEL f2 -----
CPDPRG2    waltz16
NUC2       1H
PCPD2      80.00 usec
PL2        120.00 dB
PL12       14.40 dB
SF02       500.2230013 MHz

F2 - Processing parameters
SI         65536
SF         125.7804420 MHz
WDW        EM
SSB        0
LB         1.00 Hz
GB         0
PC         1.00

1D NMR plot parameters
CX         22.80 cm
F1P        200.000 ppm
F1         25156.09 Hz
F2P        0.000 ppm
F2         0.00 Hz
PPMCM      8.77193 ppm/cm
HZCM       1103.33728 Hz/cm
    
```



1H spectrum

ppm

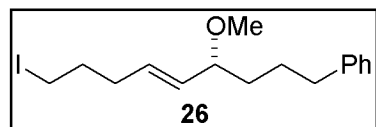

7.29030  
7.27527  
7.26000  
7.25070  
7.18987  
7.18312  
7.17545  
7.16507

5.55185  
5.52104  
5.35950  
5.34339

3.48624  
3.47041  
3.29199  
3.19468  
3.18076  
3.16696

2.62832  
2.61397  
2.59912

2.18143  
2.16762  
1.92459  
1.91040  
1.89640  
1.64910  
1.64283  
1.63812  
1.63059  
1.61624  
1.59592

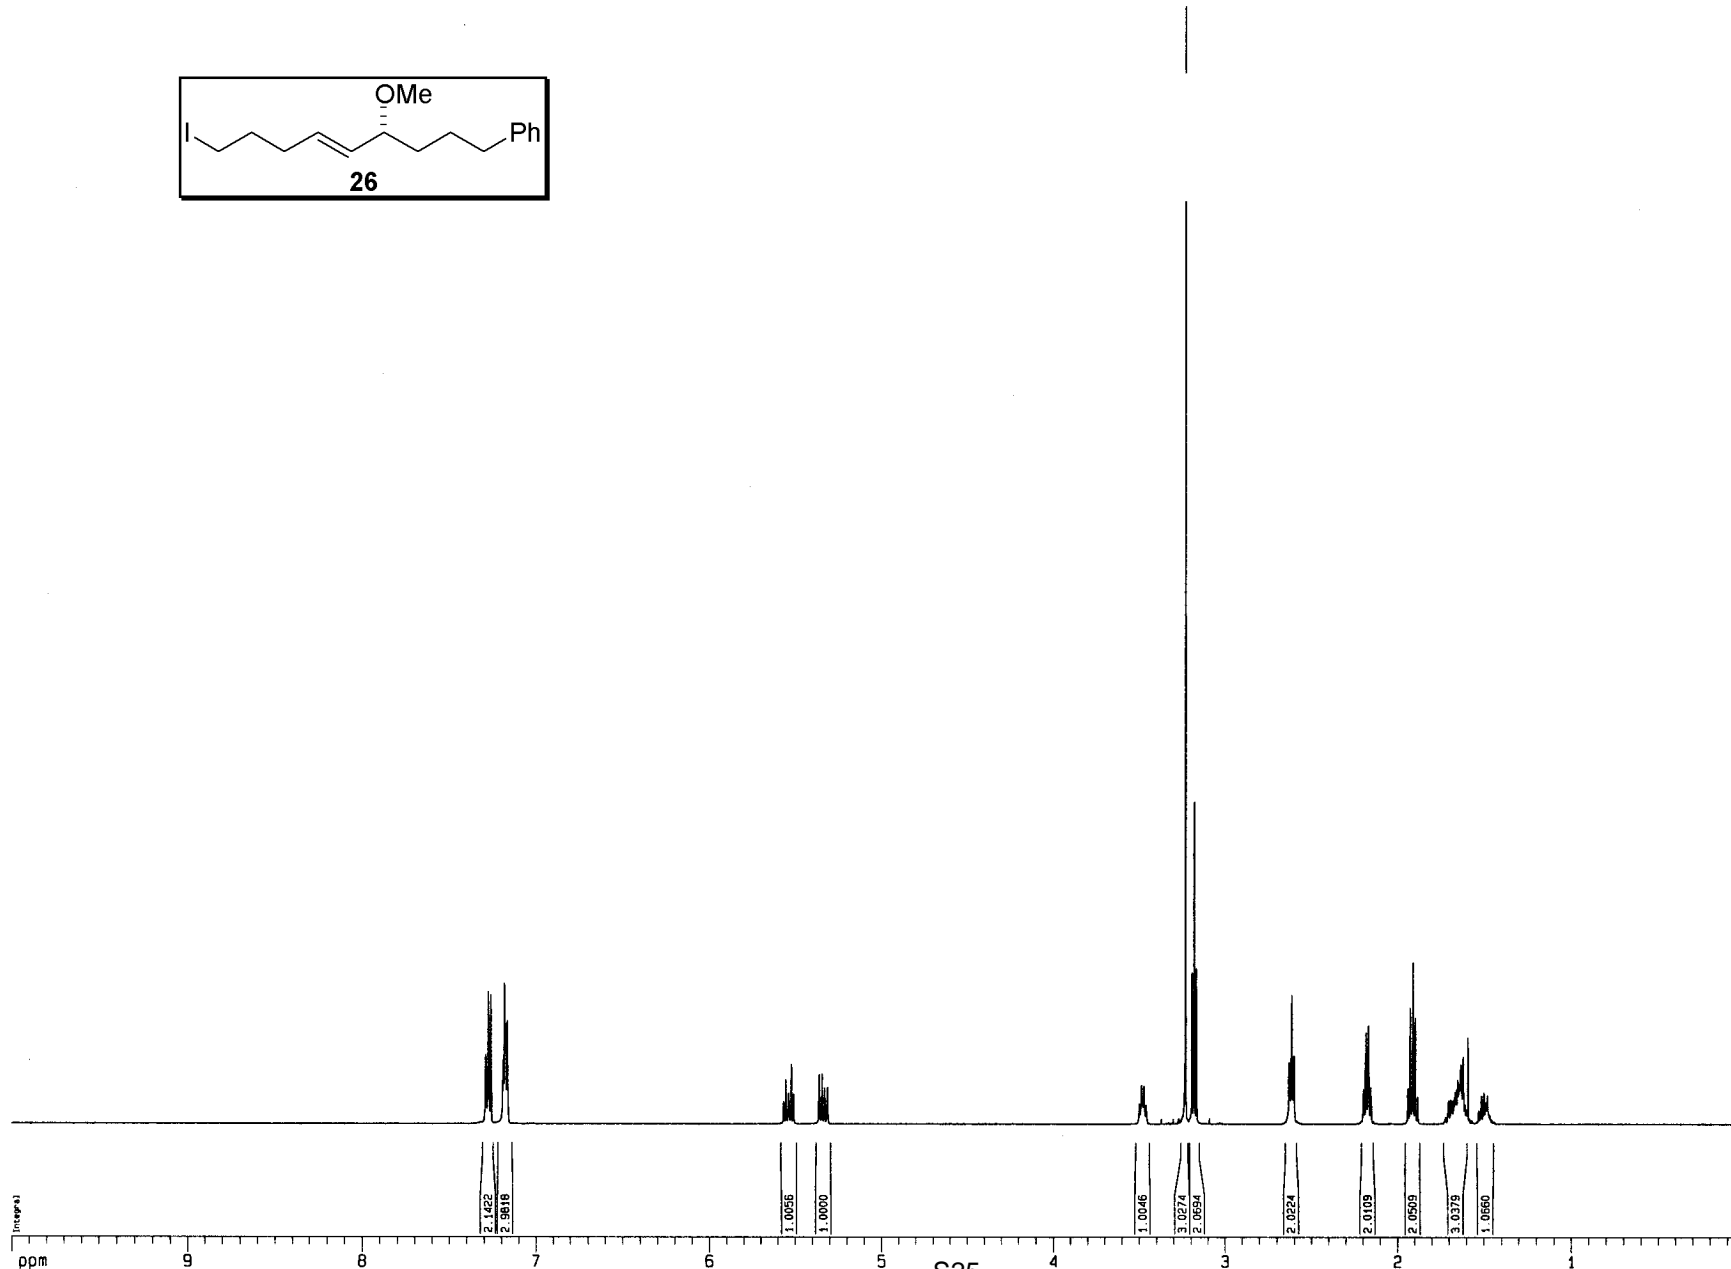

Current Data Parameters  
USER jacruz  
NAME TL-1-116  
EXPNO 1  
PROCNO 1

F2 - Acquisition Parameters  
Date\_ 20021124  
Time 2.56  
INSTRUM omeg500  
PROBHD 5 mm broadband  
PULPROG zg30  
TD 65536  
SOLVENT CDCl3  
NS 8  
DS 2  
SWH 8012.820 Hz  
FIDRES 0.122266 Hz  
AQ 4.0894966 sec  
RG 128  
DM 62.400 usec  
DE 6.00 usec  
TE 300.0 K  
D1 0.10000000 sec

----- CHANNEL f1 -----  
NUC1 1H  
P1 13.00 usec  
PL1 -1.00 dB  
SFO1 500.2235015 MHz

F2 - Processing parameters  
SI 65536  
SF 500.2200321 MHz  
WDW no  
SSB 0  
LB 0.00 Hz  
GB 0  
PC 4.00

1D NMR plot parameters  
CX 22.80 cm  
F1P 10.000 ppm  
F1 5002.20 Hz  
F2P 0.000 ppm  
F2 0.00 Hz  
PPMCM 0.43860 ppm/cm  
HZCM 219.39476 Hz/cm

13C spectrum with 1H decoupling

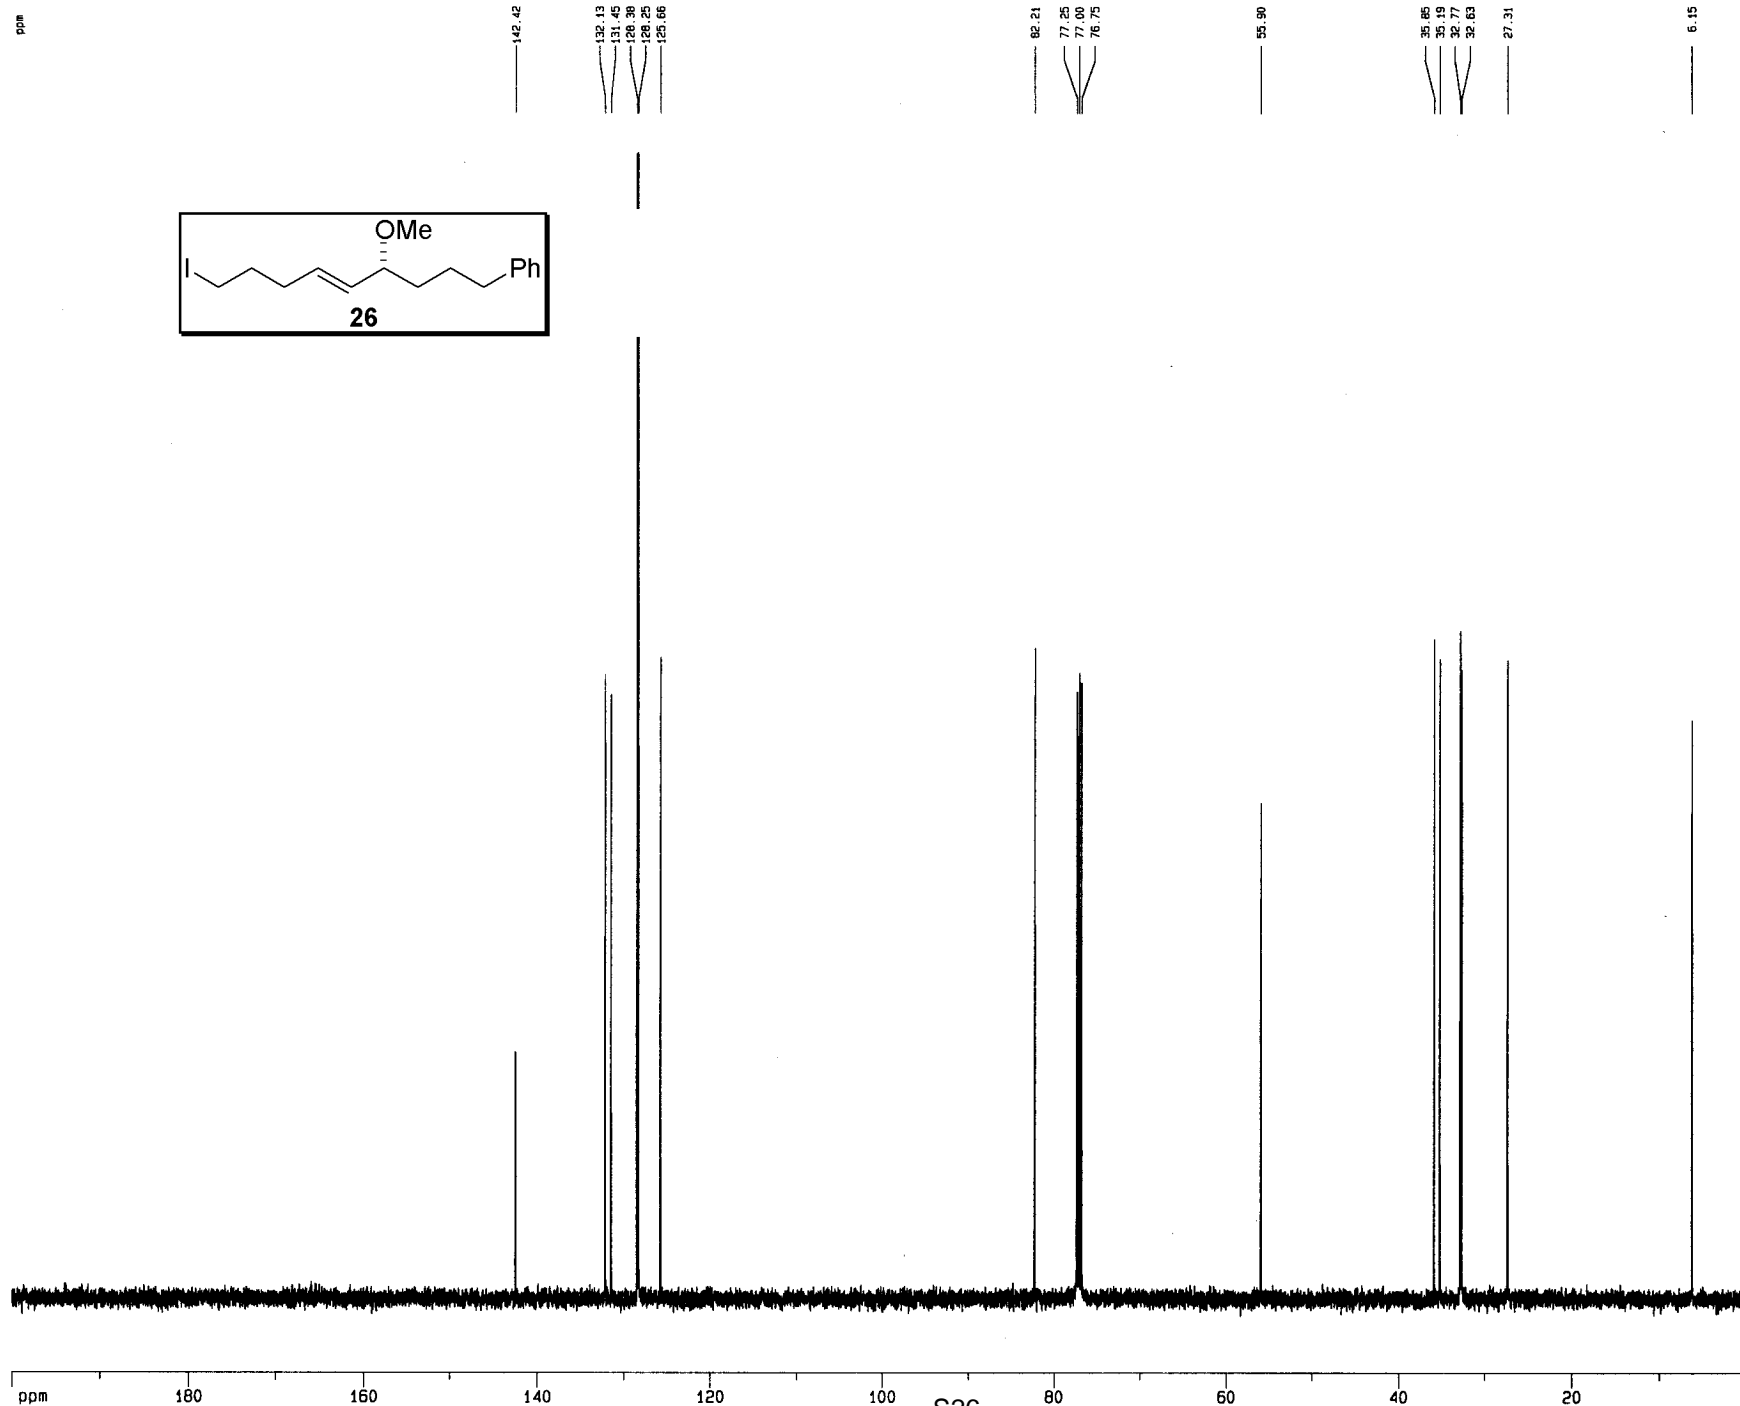

Current Data Parameters  
 USER lacruz  
 NAME TL-1-116Carbo  
 EXPNO 1  
 PROCNO 1

F2 - Acquisition Parameters  
 Date\_ 20021124  
 Time 3.12  
 INSTRUM omega500  
 PROBHD 5 mm broadban  
 PULPROG zgpg30  
 TD 65536  
 SOLVENT CDCl3  
 NS 583  
 DS 4  
 SMH 30303.031 Hz  
 FIDRES 0.462388 Hz  
 AQ 1.0813940 sec  
 RG 2896.3  
 DW 16.500 usec  
 DE 4.50 usec  
 TE 300.0 K  
 D1 0.2500000 sec  
 D11 0.0300000 sec

----- CHANNEL f1 -----  
 NUC1 13C  
 P1 29.00 usec  
 PL1 -6.00 dB  
 SFO1 125.7942048 MHz

----- CHANNEL f2 -----  
 CPDPRG2 waltz16  
 NUC2 1H  
 PCPD2 80.00 usec  
 PL2 120.00 dB  
 PL12 14.40 dB  
 SFO2 500.2230013 MHz

F2 - Processing parameters  
 S1 65536  
 SF 125.7804309 MHz  
 MDW EM  
 SSB 0  
 LB 1.00 Hz  
 GB 0  
 PC 2.00

1D NMR plot parameters  
 CX 22.80 cm  
 F1P 200.000 ppm  
 F1 25156.09 Hz  
 F2P 0.000 ppm  
 F2 0.00 Hz  
 PPMCM 8.77193 ppm/cm  
 HZCM 1103.33716 Hz/cm

1H spectrum

ppm

7.31408  
7.28947  
7.28421  
7.25984  
7.22821  
7.21146  
7.19655  
7.18613  
7.18376  
7.16980

4.66710  
4.67697  
4.66686  
4.65673  
4.51609  
4.51031  
4.49235  
4.48680

3.56611  
3.56754

2.76328  
2.77285  
2.76574  
2.75462  
2.75309  
2.70703  
2.68074  
1.95234  
1.95134  
1.95136  
1.91556  
1.91255  
1.88947  
1.86651  
1.80737  
1.80248  
1.79727  
1.78551  
1.78095  
1.77819  
1.77088  
1.40611  
1.39801

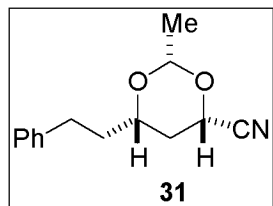

Current Date Parameters  
USER lacruz  
NAME t1-1-187lower  
EXPNO 2  
PROCNO 1

F2 - Acquisition Parameters  
Date\_ 20030328  
Time 14.37  
INSTRUM omega500  
PROBHD 5 mm broadband  
PULPROG zg30  
TD 65536  
SOLVENT CDCl3  
NS 8  
DS 2  
SWH 8012.820 Hz  
FIDRES 0.122266 Hz  
AQ 4.0894966 sec  
RG 128  
DW 62.400 usec  
DE 6.00 usec  
TE 300.0 K  
D1 0.1000000 sec

----- CHANNEL f1 -----  
NUC1 1H  
P1 13.00 usec  
PL1 -1.00 dB  
SF01 500.2235015 MHz

F2 - Processing parameters  
SI 65536  
SF 500.2200311 MHz  
WQM no  
SSB 0  
LB 0.00 Hz  
GB 0  
PC 4.00

ID NMR plot parameters  
CX 22.80 cm  
F1P 10.000 ppm  
F1 5002.20 Hz  
F2P 0.000 ppm  
F2 0.00 Hz  
PPMCM 0.43860 ppm/cm  
HZCM 219.39476 Hz/cm

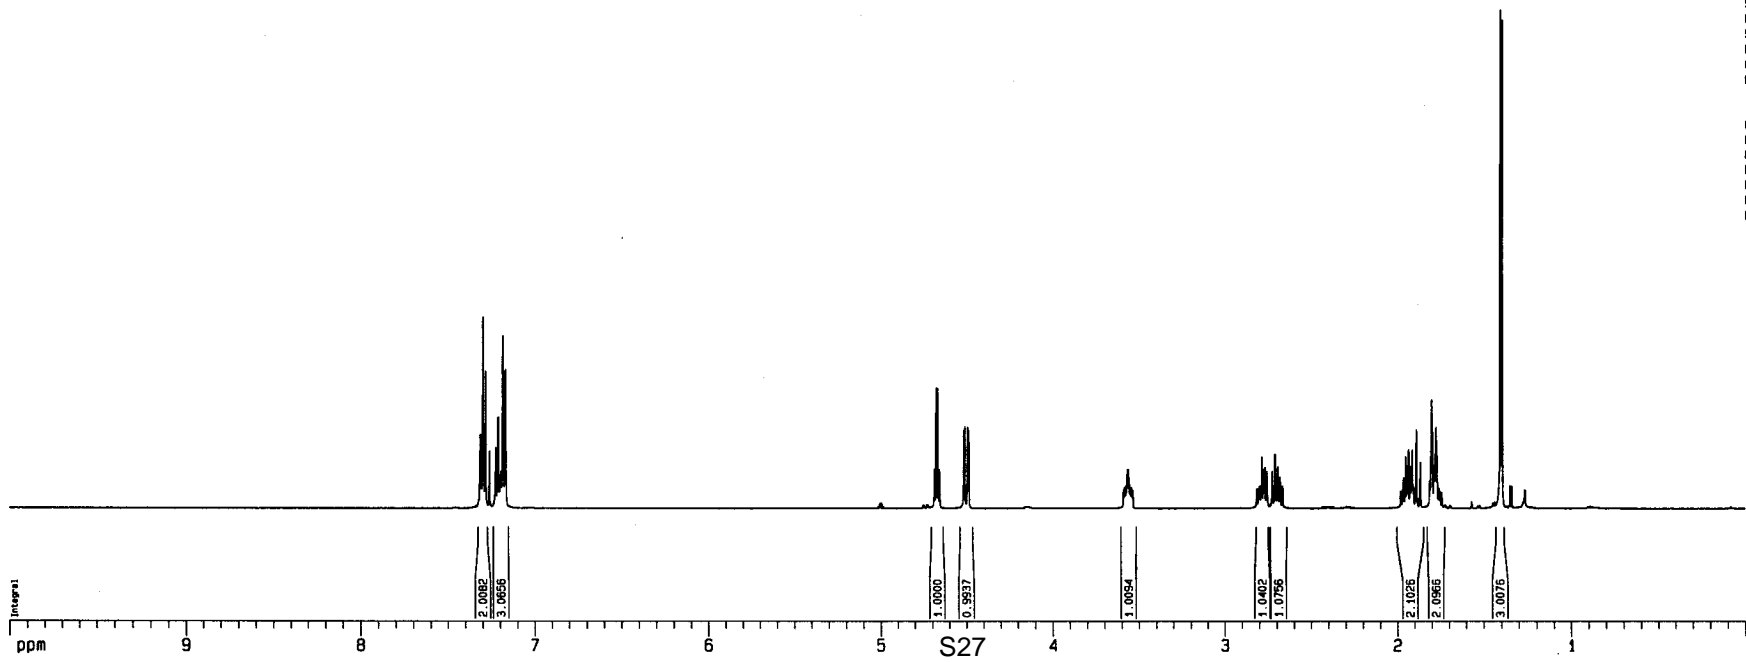

<sup>13</sup>C spectrum with <sup>1</sup>H decoupling

ppm

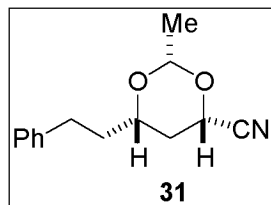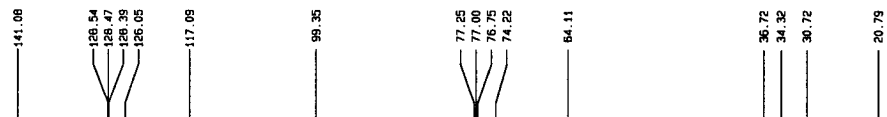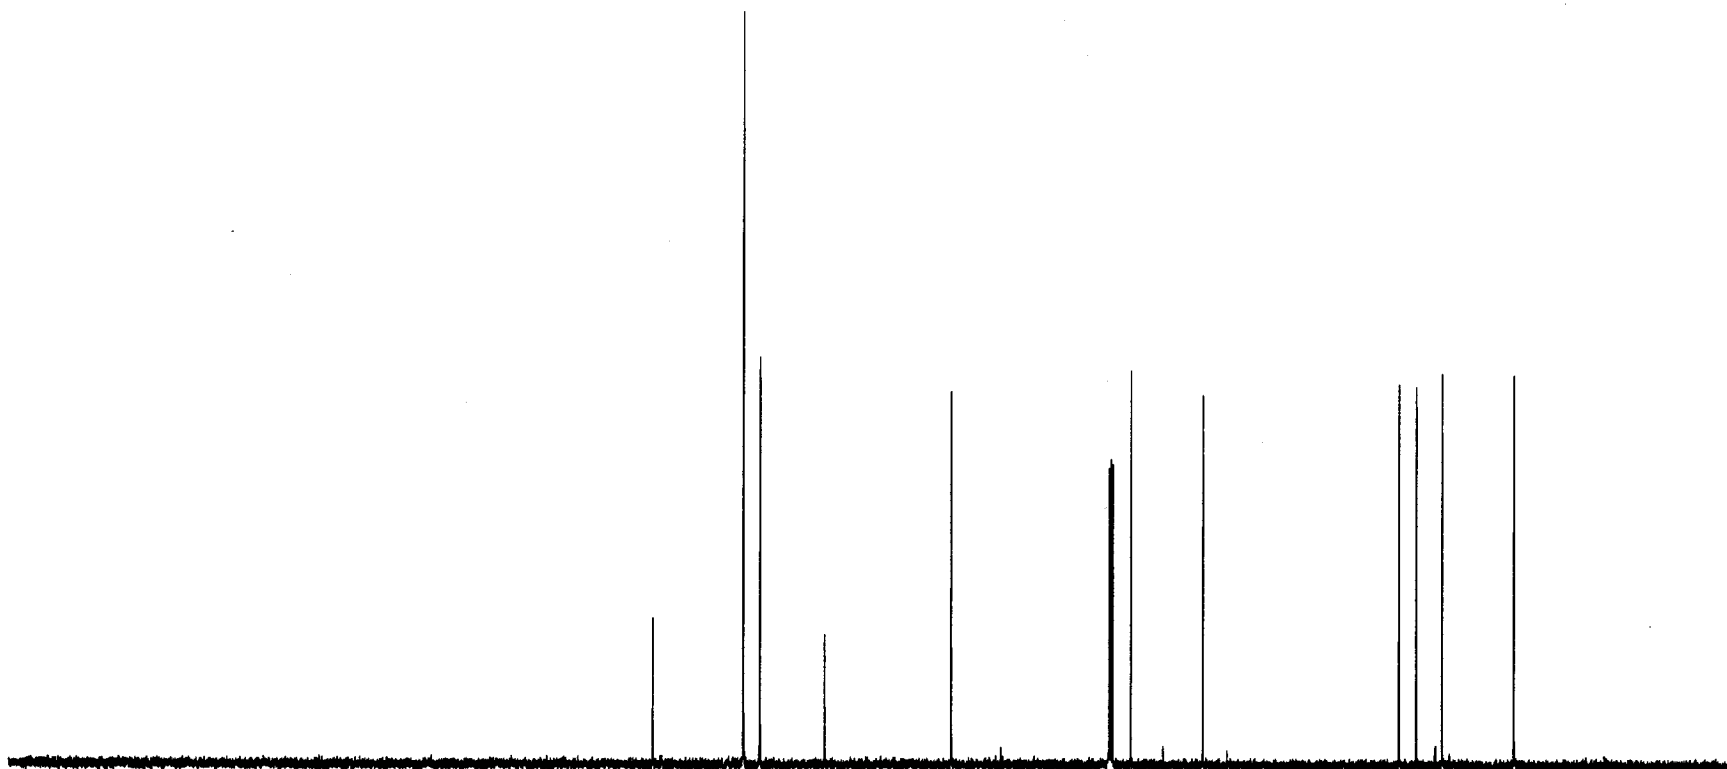

ppm 200 150 928 50 0

Current Data Parameters  
 USER lacruz  
 NAME t1-1-187lowcar  
 EXPNO 2  
 PROCNO 1

F2 - Acquisition Parameters  
 Date\_ 20030328  
 Time 14.48  
 INSTRUM omega500  
 PROBHD 5 mm broadband  
 PULPROG zgpg30  
 TD 65536  
 SOLVENT CDCl3  
 NS 418  
 DS 4  
 SMH 30303.031 Hz  
 FIDRES 0.462388 Hz  
 AQ 1.0813940 sec  
 RG 4096  
 DM 16.500 usec  
 DE 4.50 usec  
 TE 300.0 K  
 D1 0.25000000 sec  
 D11 0.03000000 sec

----- CHANNEL f1 -----  
 NUC1 13C  
 P1 26.50 usec  
 PL1 -6.00 dB  
 SF01 125.7942048 MHz

----- CHANNEL f2 -----  
 CPOPRG2 waltz16  
 NUCC 1H  
 P1P2 80.00 usec  
 PL2 -1.00 dB  
 PL12 14.40 dB  
 SF02 500.2230013 MHz

F2 - Processing parameters  
 SI 65536  
 SF 125.7804313 MHz  
 WDW EM  
 SSB 0  
 LB 1.00 Hz  
 GB 0  
 PC 2.00

1D NMR plot parameters  
 CX 22.80 cm  
 F1P 230.460 ppm  
 F1 28987.37 Hz  
 F2P -10.460 ppm  
 F2 -1315.67 Hz  
 PPMCN 10.56668 ppm/cm  
 HZCN 1329.09093 Hz/cm

<sup>1</sup>H spectrum

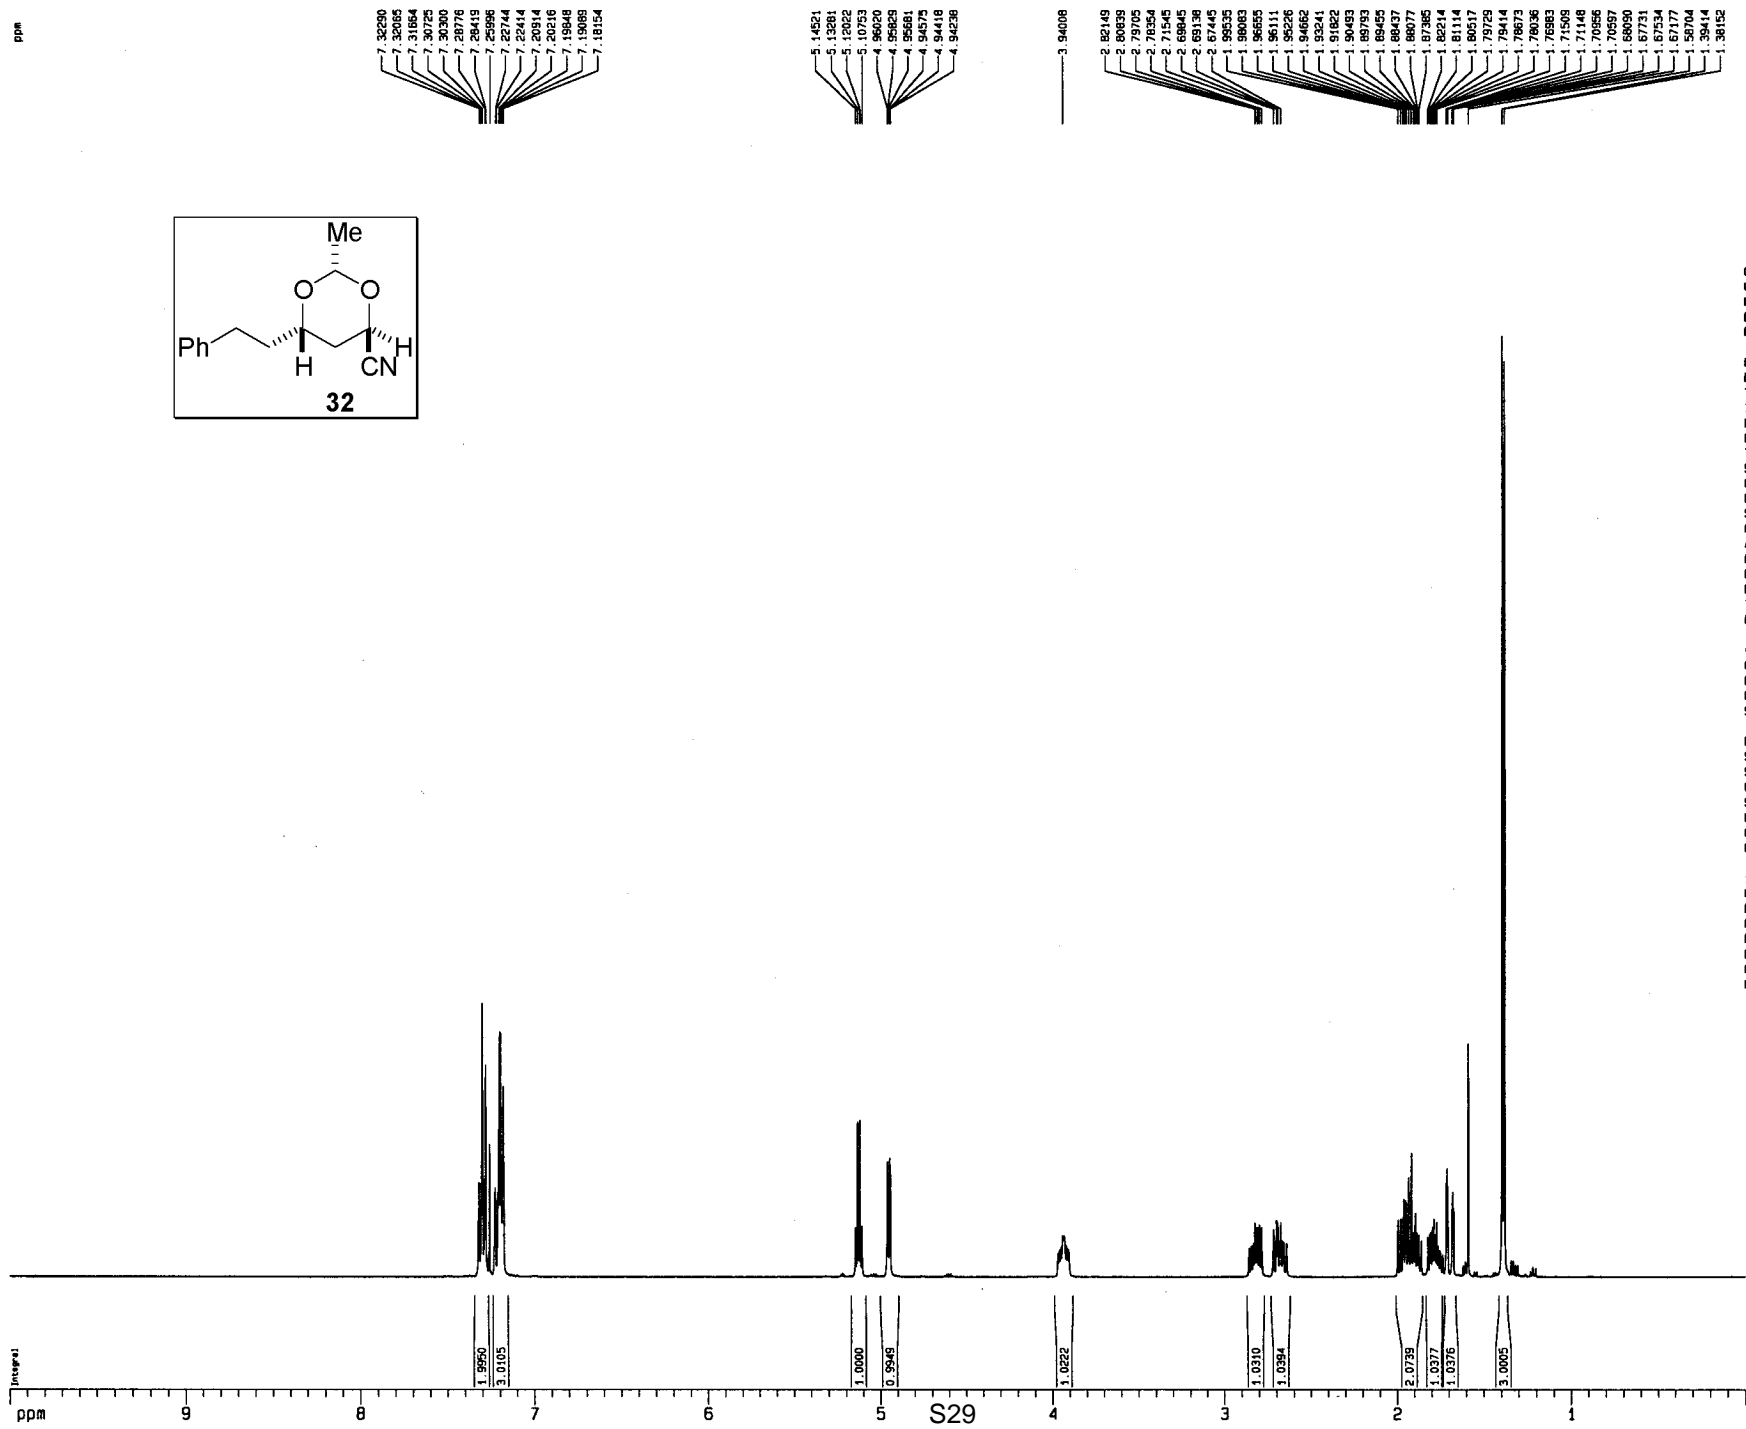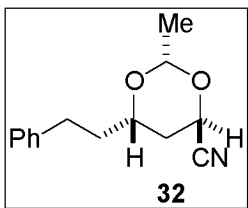

Current Data Parameters  
 USER Jacruz  
 NAME Lac4  
 EXPNO 3  
 PROCNO 1

F2 - Acquisition Parameters  
 Date\_ 20030326  
 Time 17.57  
 INSTRUM drx400  
 PROBHD 5 mm QNP H/F  
 PULPROG zg30  
 TD 65536  
 SOLVENT COC13  
 NS 8  
 DS 2  
 SWH 5410.256 Hz  
 FIDRES 0.097813 Hz  
 AQ 5.1118579 sec  
 RG 128  
 RC 78.000 usec  
 DK 4.50 usec  
 DE 300.0 K  
 TE 0.10000000 sec

\*\*\*\*\* CHANNEL f1 \*\*\*\*\*  
 NUC1 <sup>1</sup>H  
 P1 12.00 usec  
 PL1 0.00 dB  
 SF01 400.1328009 MHz

F2 - Processing parameters  
 SI 65536  
 SF 400.1300218 MHz  
 MDW no  
 SSB 0  
 LB 0.00 Hz  
 GB 0  
 PC 2.00

1D NMR plot parameters  
 CX 22.80 cm  
 F1P 10.000 ppm  
 F1 4001.30 Hz  
 F2P 0.000 ppm  
 F2 0.00 Hz  
 PPMCM 0.43860 ppm/cm  
 HZCM 175.49564 Hz/cm

13C spectrum with 1H decoupling

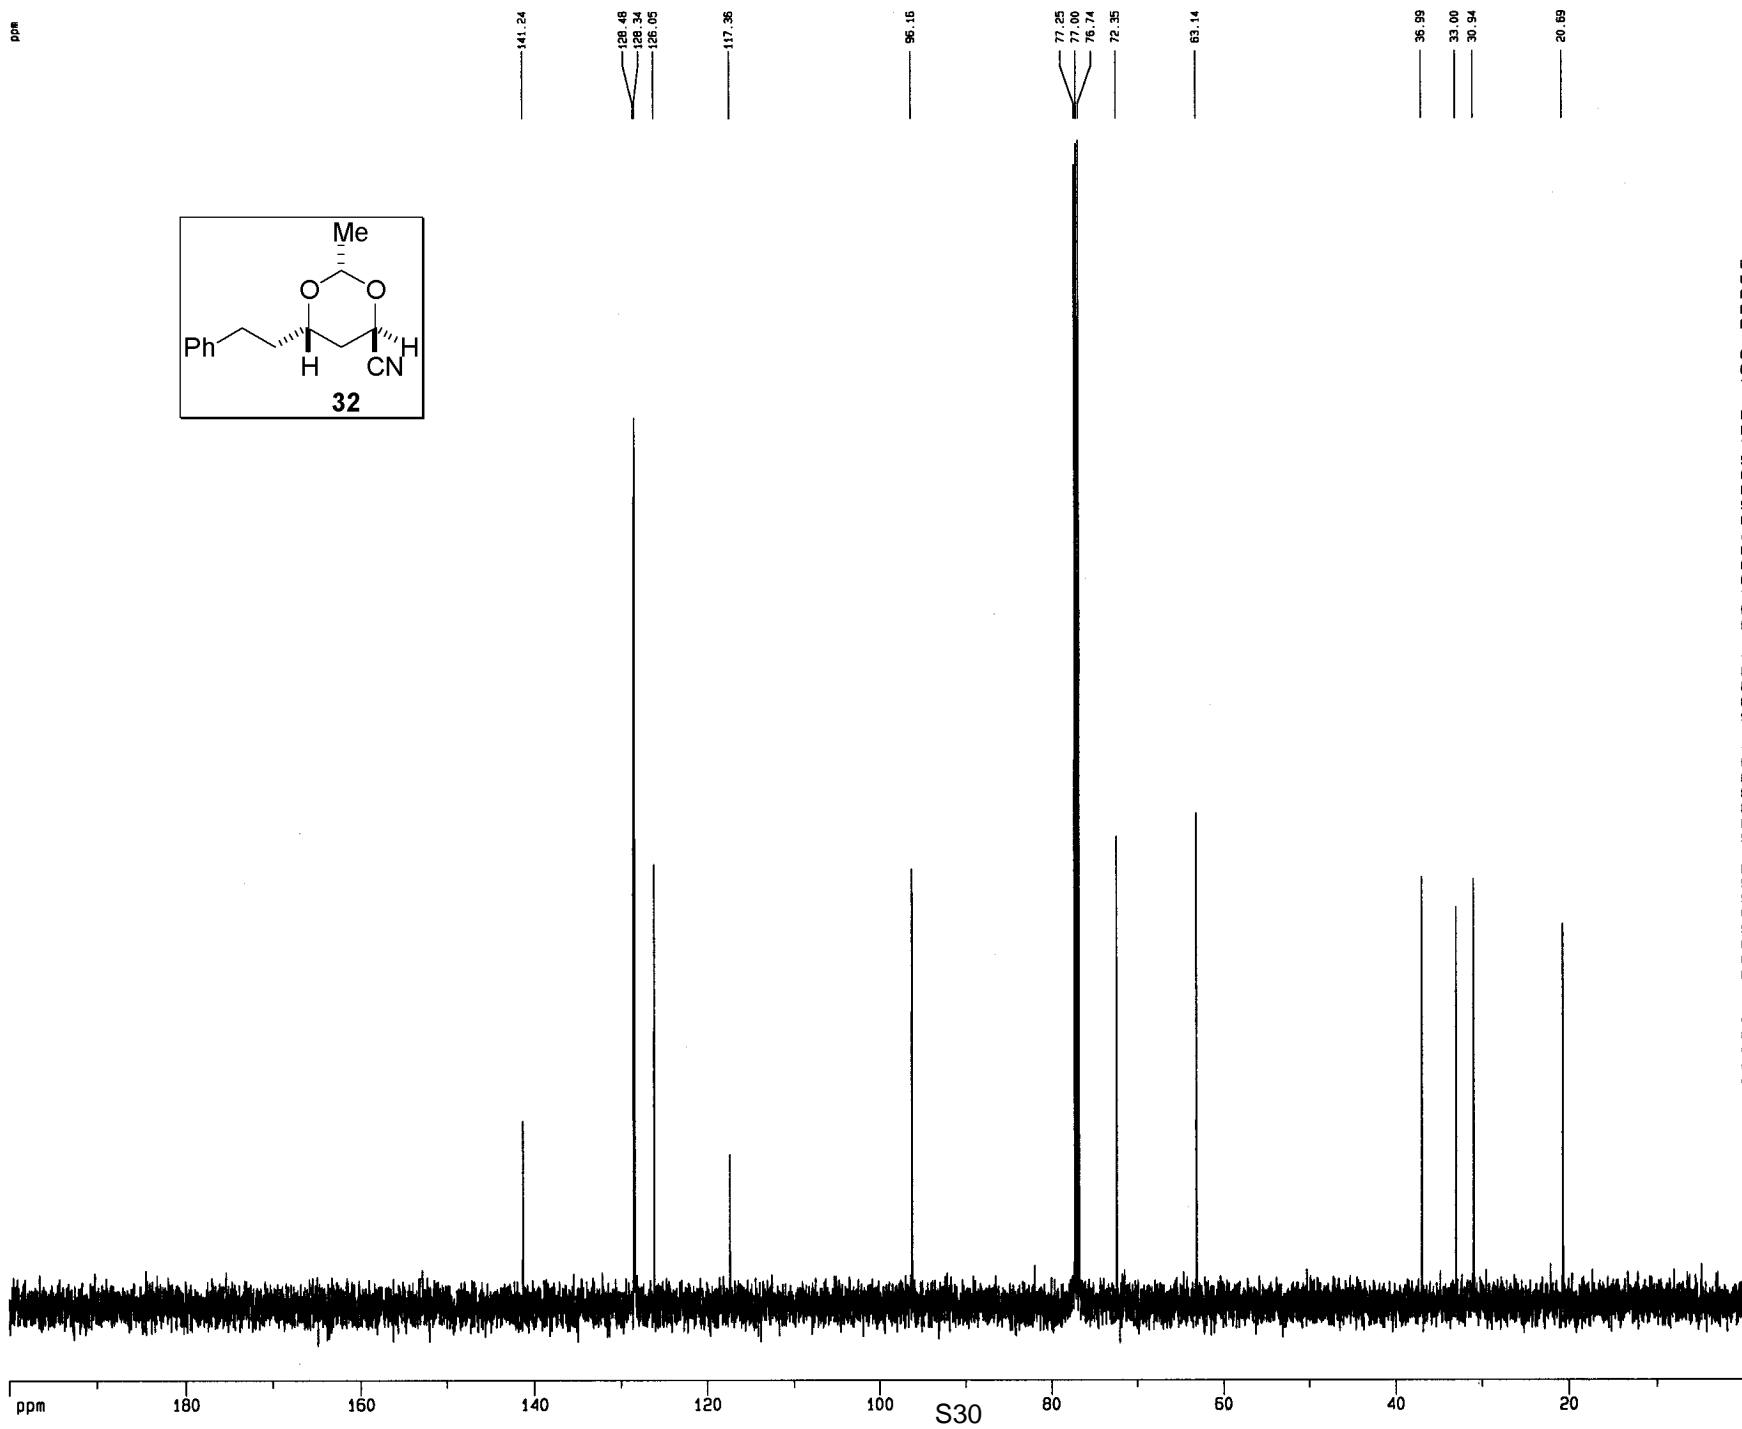

Current Data Parameters  
 USER lacruz  
 NAME t1-1-187upcarb  
 EXPNO 1  
 PROCNO 1

F2 - Acquisition Parameters  
 Date\_ 20030308  
 Time 18.22  
 INSTRUM omega500  
 PROBD 5 mm broadnm  
 PULPROG zgpg30  
 TD 65536  
 SOLVENT CDCl3  
 NS 402  
 DS 4  
 SWH 30303.031 Hz  
 FIDRES 0.462388 Hz  
 AQ 1.0813940 sec  
 RG 2580.3  
 DW 16.500 usec  
 DE 4.50 usec  
 TE 300.0 K  
 D1 0.25000000 sec  
 D11 0.03000000 sec

----- CHANNEL f1 -----  
 NUC1 13C  
 P1 26.50 usec  
 PL1 -6.00 dB  
 SF01 125.7942048 MHz

----- CHANNEL f2 -----  
 CPDPRG2 waltz16  
 NUC2 1H  
 PCPD2 80.00 usec  
 PL2 -1.00 dB  
 PL12 14.40 dB  
 SF02 500.2230013 MHz

F2 - Processing parameters  
 SI 65536  
 SF 125.7804290 MHz  
 WDW EM  
 SSB 0  
 LB 1.00 Hz  
 GB 0  
 PC 2.00

ID NMR plot parameters  
 CX 22.80 cm  
 F1P 200.000 ppm  
 F1 25156.09 Hz  
 F2P 0.000 ppm  
 F2 0.00 Hz  
 PPMCM 8.77193 ppm/cm  
 HZCM 1103.33716 Hz/cm



13C spectrum with 1H decoupling

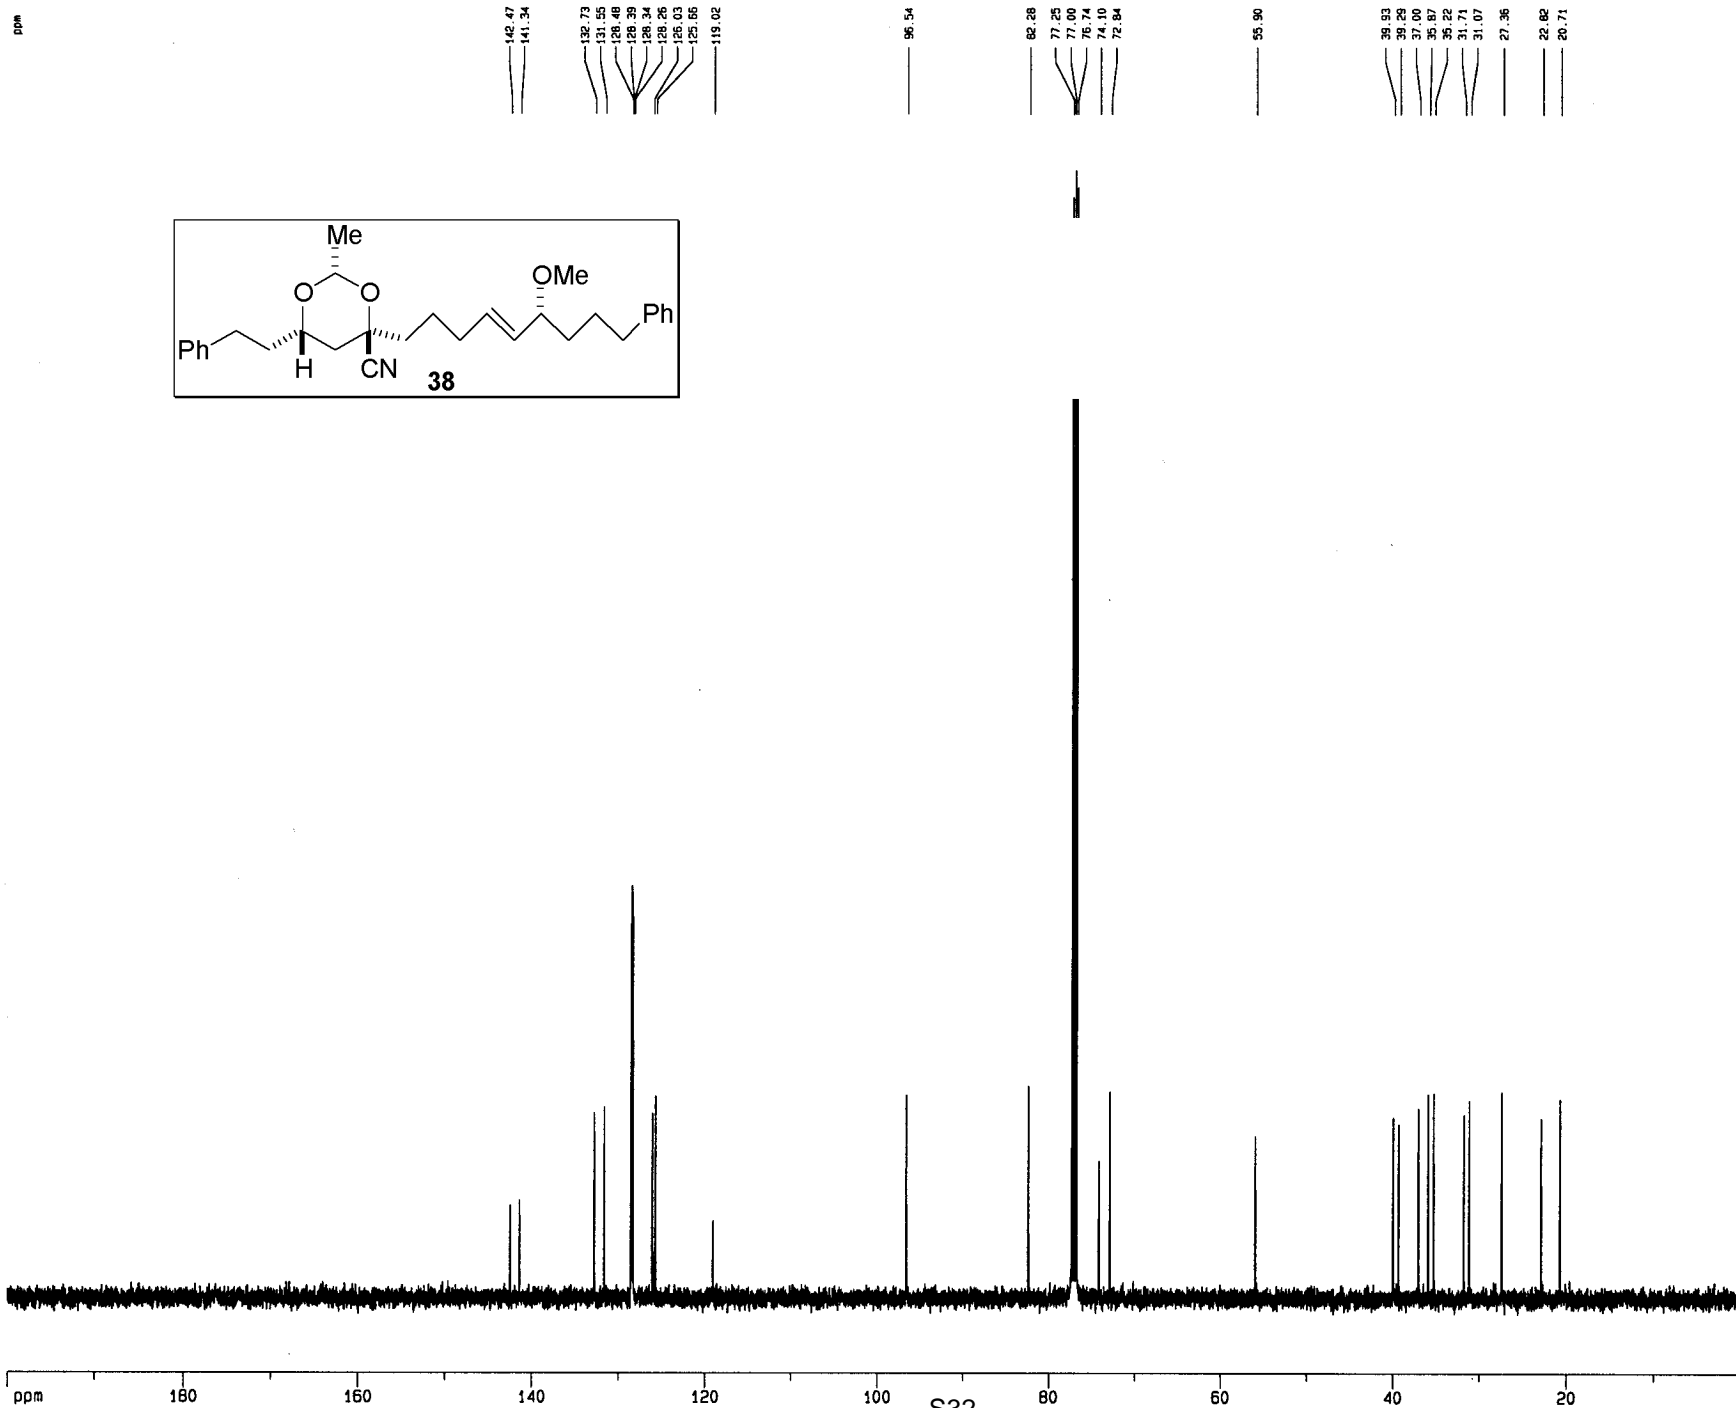

```

Current Data Parameters
USER          lacruz
NAME          tl-1-189carbo
EXPNO        1
PROCNO       1

F2 - Acquisition Parameters
Date_        20030324
Time         19.32
INSTRUM      omega500
PROBHD       5 mm broadband
PULPROG      zgpg30
TD           65536
SOLVENT      CDCl3
NS           1316
DS           4
SWH          30303.031 Hz
FIDRES      0.462388 Hz
AQ          1.0813940 sec
RG          7298.2
DM          16.500 usec
DE          4.50 usec
TE          300.0 K
D1          0.25000000 sec
D11         0.03000000 sec

----- CHANNEL f1 -----
NUC1         13C
P1           26.50 usec
PL1          -6.00 dB
SFO1         125.7942048 MHz

----- CHANNEL f2 -----
CPDPRG2      waltz16
NUC2         1H
PCPD2        80.00 usec
PL2          -1.00 dB
PL12         14.40 dB
SFO2         500.2230013 MHz

F2 - Processing parameters
SI           65536
SF           125.7804276 MHz
WDW          EM
SSB          0
LB           1.00 Hz
GB           0
PC           2.00

1D NMR plot parameters
CX           22.80 cm
F1P         200.000 ppm
F1           25156.09 Hz
F2P         0.000 ppm
F2           0.00 Hz
PPMCM       8.77193 ppm/cm
HZCM        1103.33716 Hz/cm
    
```



1H spectrum

ppm

7.30477  
7.28930  
7.38172  
7.27466  
7.26042  
7.26983  
7.20787  
7.19357  
7.17758

5.50590  
5.49326  
5.48062  
5.41595  
5.36548  
4.82841  
4.16119

2.73829  
2.71828  
2.63622  
2.62102  
2.60525  
2.07586  
2.06203  
2.04771  
2.03346  
1.94390  
1.92472  
1.90888  
1.89001  
1.86118  
1.87448  
1.95394  
1.78542  
1.72250  
1.70778  
1.69284  
1.67757  
1.63343  
1.62458  
1.60690  
1.60132  
1.57938  
1.56515  
1.56006  
1.53859  
1.53345  
1.49787  
1.47509  
1.47158  
1.44872  
1.26513  
1.25500

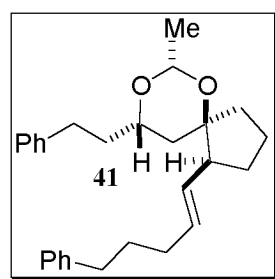

Current Data Parameters  
USER lacruz  
NAME t1-1-193  
EXPNO 1  
PROCNO 1

F2 - Acquisition Parameters  
Date\_ 20030320  
Time 16.19  
INSTRUM omega500  
PROBHD 5 mm broadband  
PULPROG zg30  
TD 65536  
SOLVENT CDCl3  
NS 8  
DS 2  
SMH 8012.820 Hz  
FIDRES 0.122266 Hz  
AQ 4.0894966 sec  
RG 128  
DM 62.400 usec  
DE 6.00 usec  
TE 300.0 K  
C1 0.10000000 sec

----- CHANNEL f1 -----  
NUC1 1H  
P1 13.00 usec  
PL1 -1.00 dB  
SFO1 500.2235015 MHz

F2 - Processing parameters  
SI 65536  
SF 500.2200313 MHz  
WDW no  
SSB 0  
LB 0.00 Hz  
GB 0  
PC 4.00

1D NMR plot parameters  
CX 22.80 cm  
F1P 10.000 ppm  
F1 5002.20 Hz  
F2P 0.000 ppm  
F2 0.00 Hz  
PPMCM 0.43860 ppm/cm  
HZCM 219.39476 Hz/cm

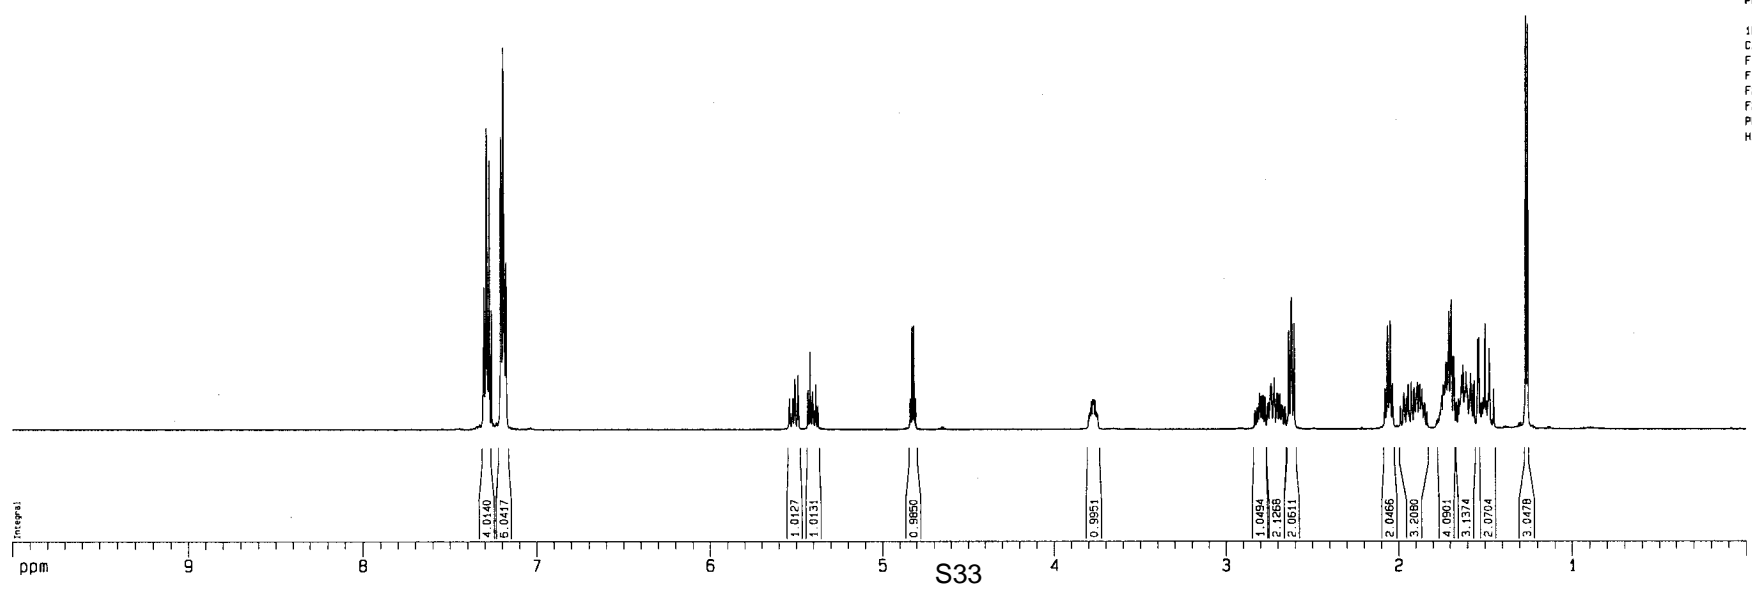

13C spectrum with 1H decoupling

ppm

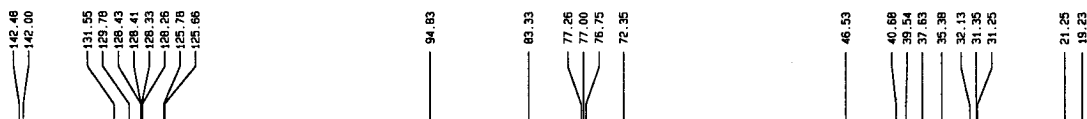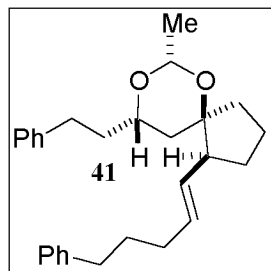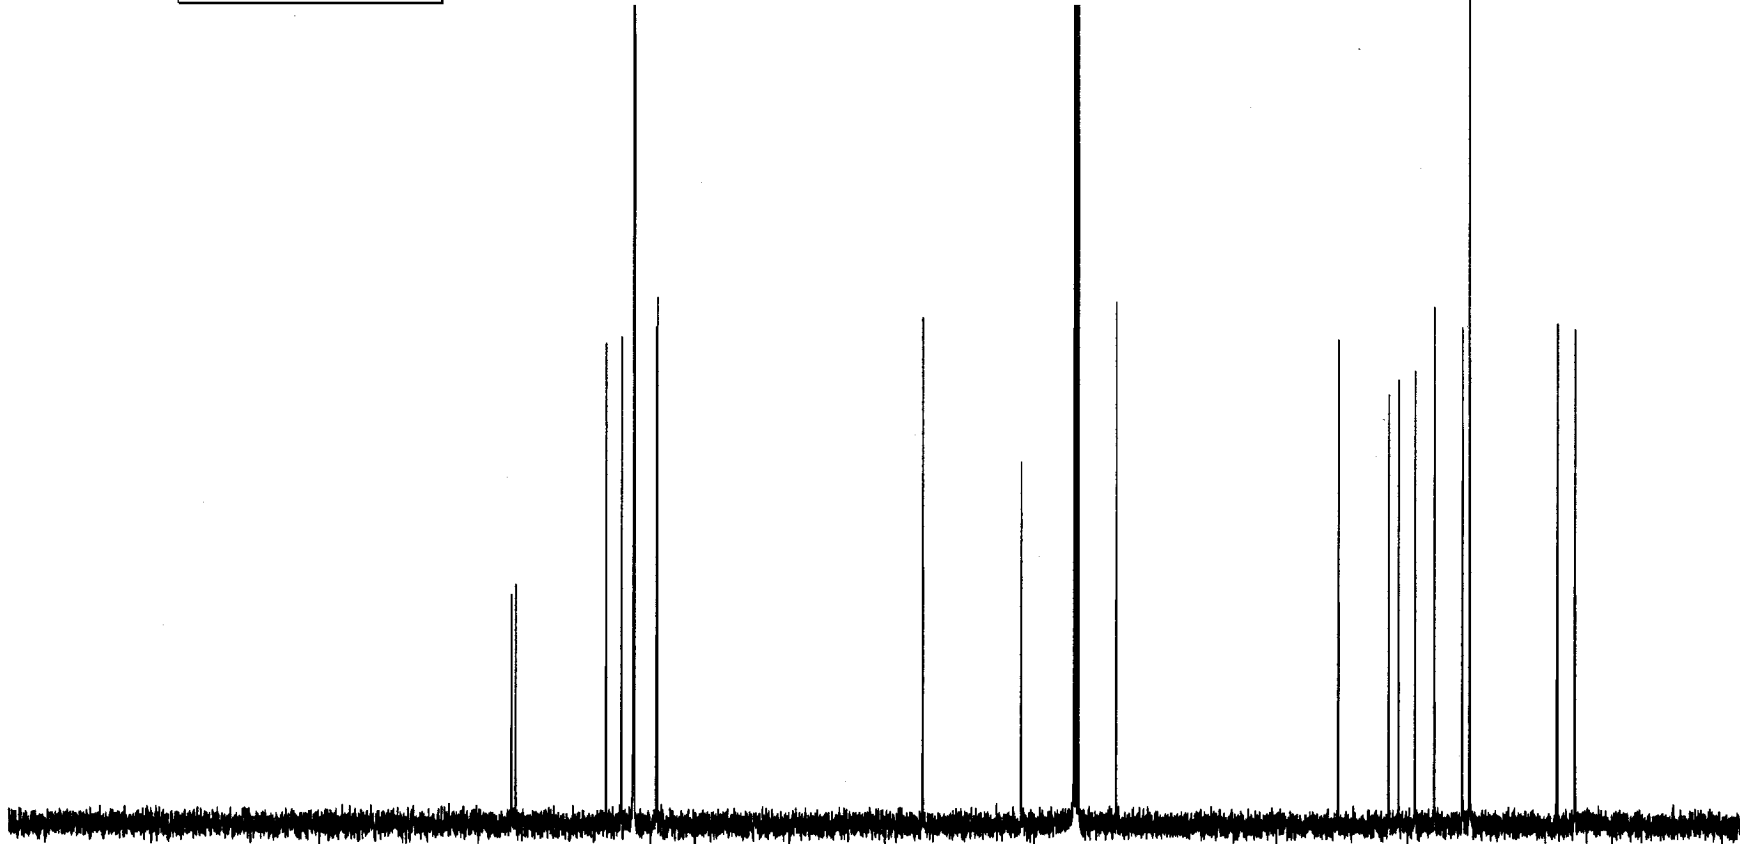

Current Data Parameters  
 USER lacruz  
 NAME t1-1-193carb  
 EXPNO 1  
 PROCNO 1

F2 - Acquisition Parameters  
 Date\_ 20030320  
 Time 15:33  
 INSTRUM omega500  
 PROBHD 5 mm broadband  
 PULPROG zgpg30  
 TD 65536  
 SOLVENT CDCl3  
 NS 548  
 DS 4  
 SWH 30303.031 Hz  
 FIDRES 0.462988 Hz  
 AQ 1.0813940 sec  
 RG 2580.3  
 DW 16.500 usec  
 DE 4.50 usec  
 TE 300.0 K  
 D1 0.25000000 sec  
 D11 0.03000000 sec

----- CHANNEL f1 -----  
 NUC1 13C  
 P1 26.50 usec  
 PL1 -6.00 dB  
 SF01 125.7942048 MHz

----- CHANNEL f2 -----  
 CPOPRG2 waltz16  
 NUC2 1H  
 PCPD2 80.00 usec  
 PL2 -1.00 dB  
 PL12 14.40 dB  
 SF02 500.2230013 MHz

F2 - Processing parameters  
 S1 65536  
 SF 125.7804290 MHz  
 MDM EM  
 SSB 0  
 LB 1.00 Hz  
 GB 0  
 PC 2.00

ID NMR plot parameters  
 CX 22.80 cm  
 F1P 200.000 ppm  
 F1 25156.09 Hz  
 F2P 0.000 ppm  
 F2 0.00 Hz  
 PPMCM 8.77193 ppm/cm  
 HZCM 1103.33716 Hz/cm

ppm 180 160 140 120 100 80 60 40 20

1H spectrum

ppm

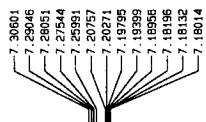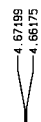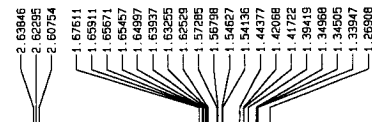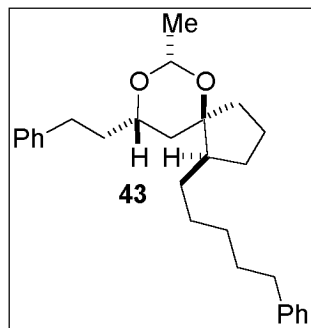

Current Data Parameters  
USER lacruz  
NAME t1-1-196  
EXPNO 1  
PROCNO 1

F2 - Acquisition Parameters  
Date\_ 20030417  
Time 14.41  
INSTRUM omega500  
PROBHD 5 mm broadband  
PULPROG zg30  
TD 65536  
SOLVENT C0C13  
NS 8  
DS 2  
SWH 8012.820 Hz  
FIDRES 0.122266 Hz  
AQ 4.0894966 sec  
RG 128  
DM 62.400 usec  
DE 6.00 usec  
TE 300.0 K  
D1 0.1000000 sec

===== CHANNEL f1 =====  
NUC1 1H  
P1 13.00 usec  
PL1 -1.00 dB  
SF01 500.2295015 MHz

F2 - Processing parameters  
S1 65536  
SF 500.2200311 MHz  
WDW no  
SSB 0  
LB 0.00 Hz  
GB 0  
PC 0.20

1D NMR plot parameters  
CX 22.80 cm  
F1P 10.000 ppm  
F1 5002.20 Hz  
F2P 0.000 ppm  
F2 0.00 Hz  
PPMCM 0.43860 ppm/cm  
HZCM 219.39476 Hz/cm

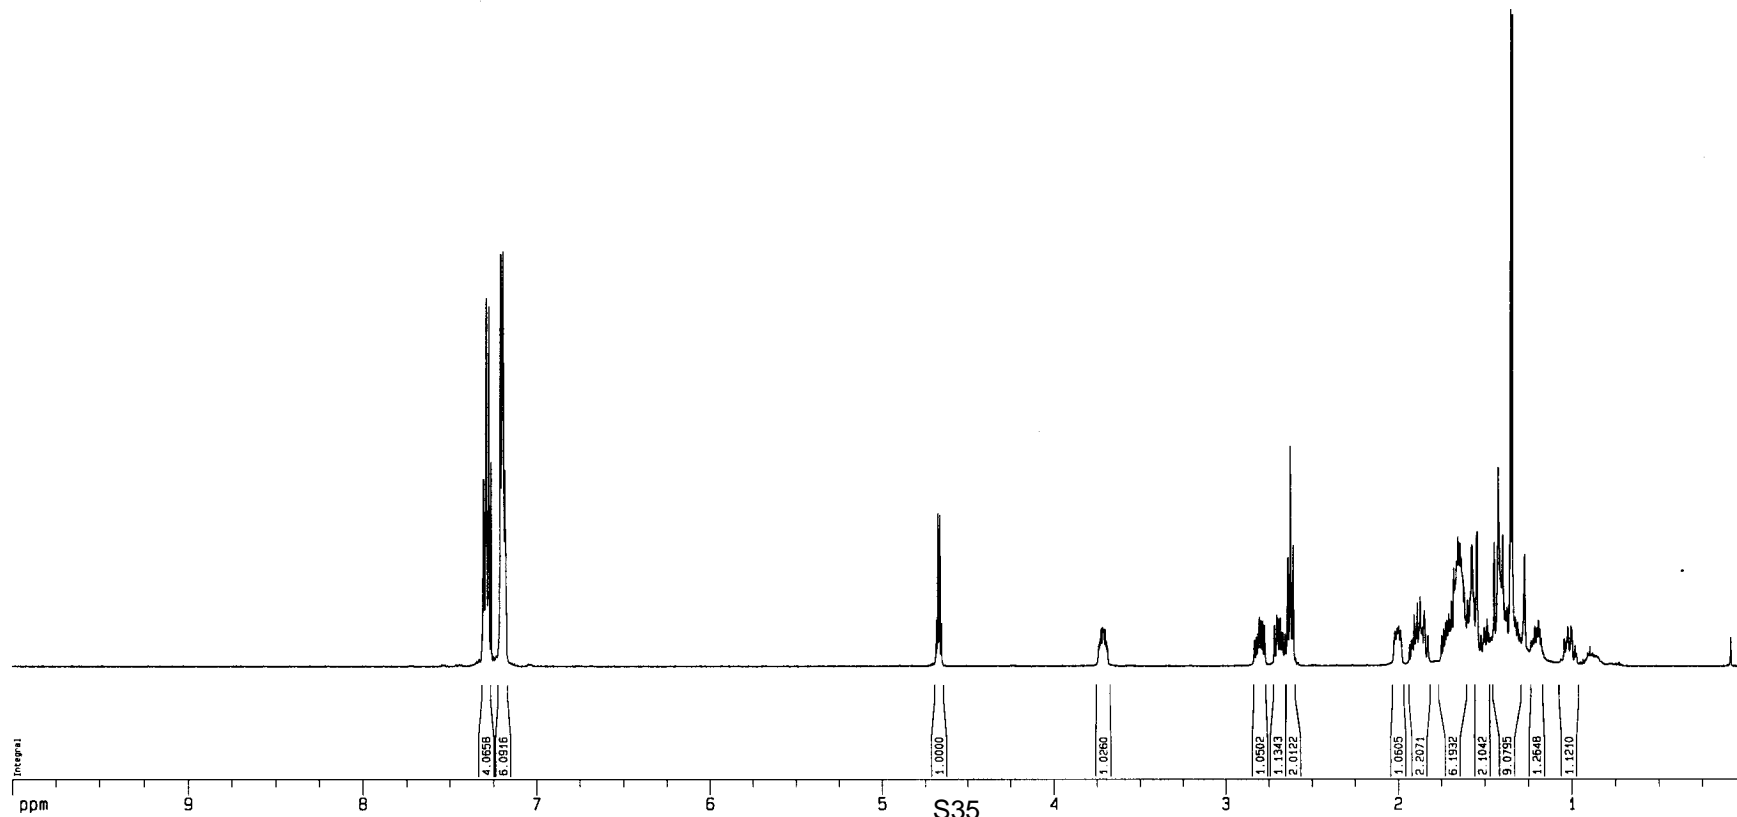

13C spectrum with 1H decoupling

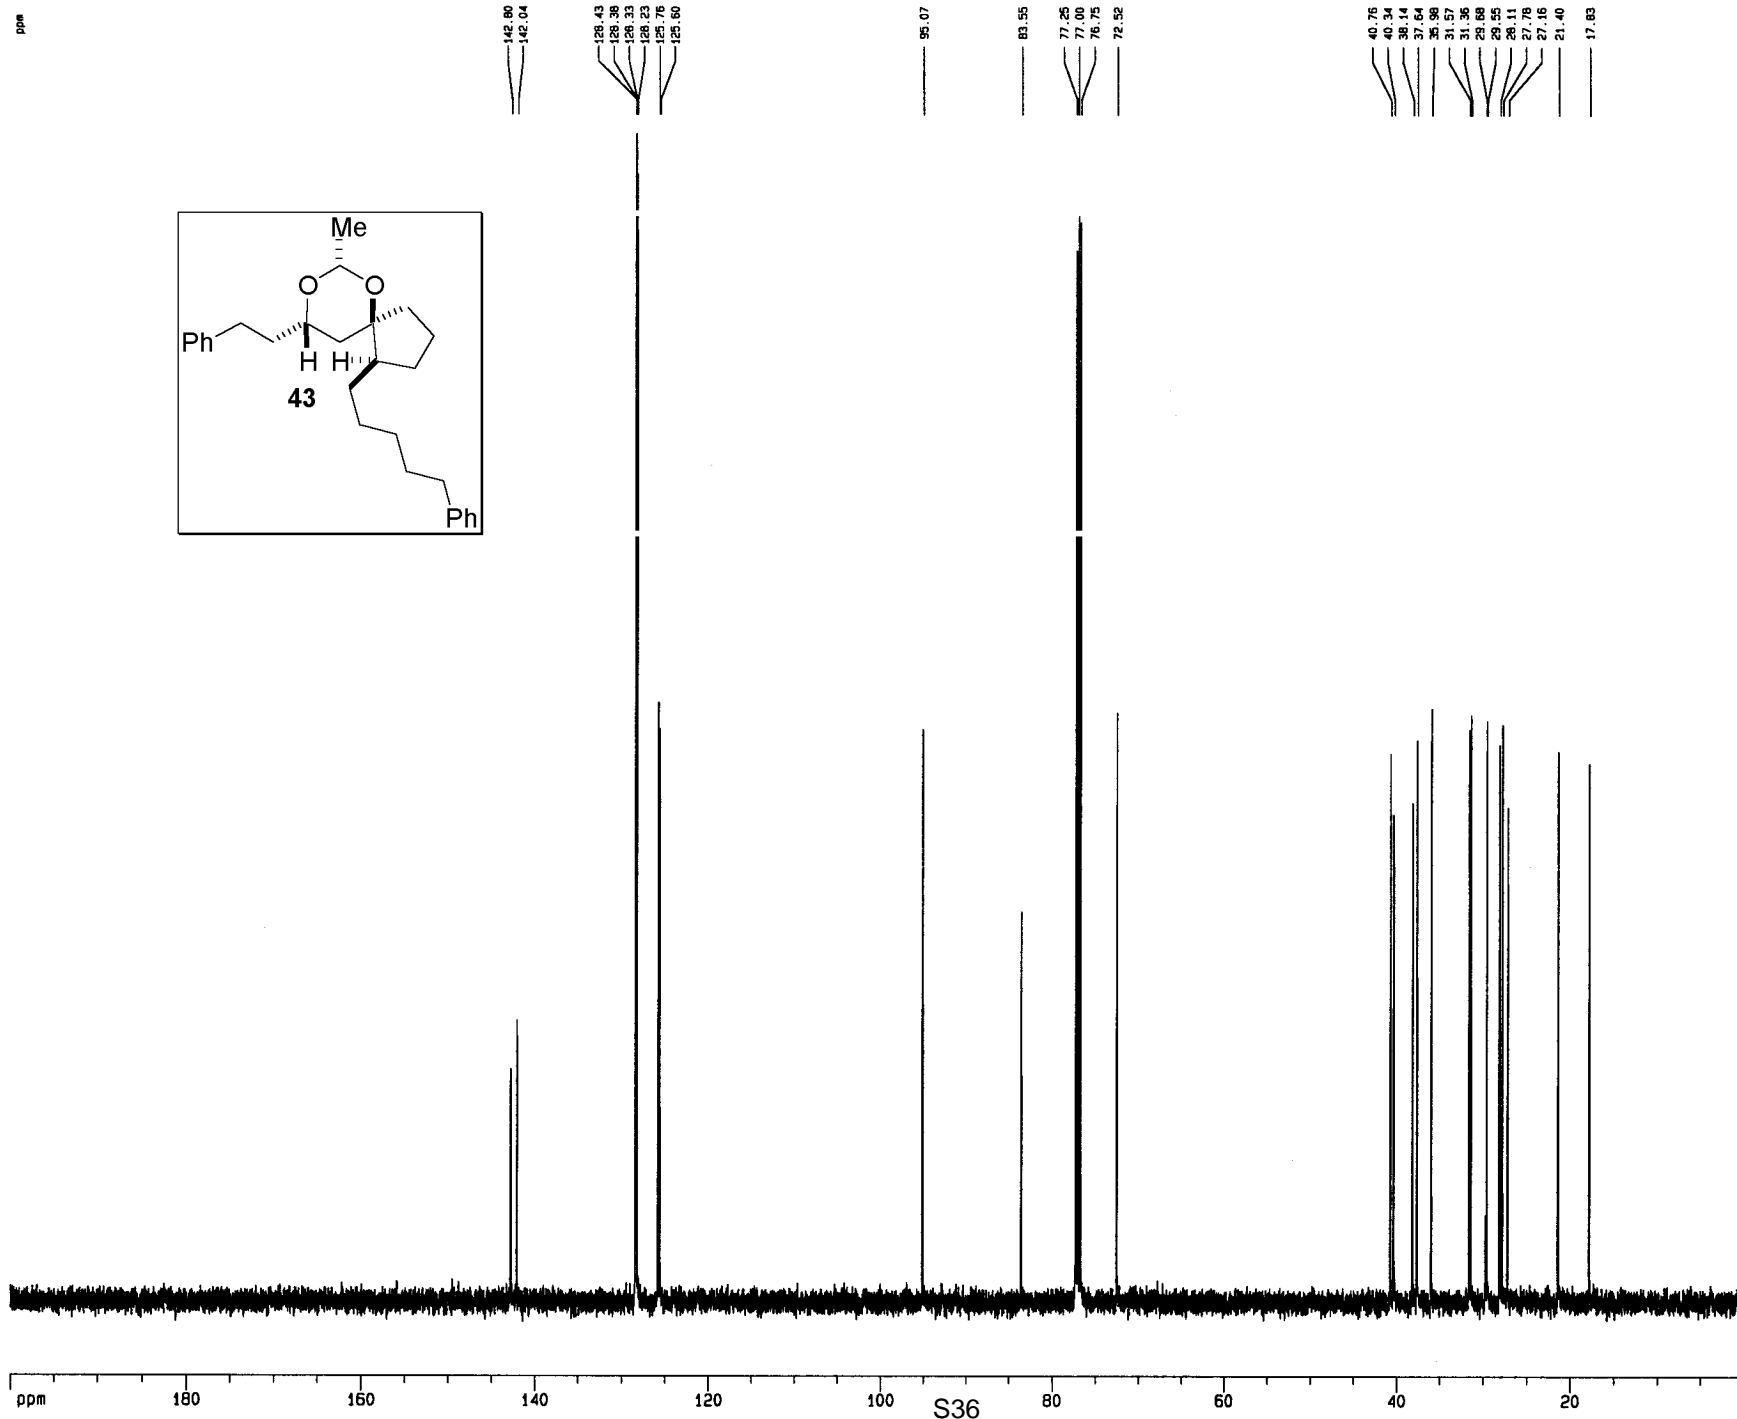

Current Data Parameters  
 USER lacruz  
 NAME tl-1-196  
 EXPNO 2  
 PROCNO 1

F2 - Acquisition Parameters  
 Date\_ 20030417  
 Time 14.48  
 INSTRUM omega500  
 PROBHD 5 mm broadband  
 PULPROG zgpg30  
 TD 65536  
 SOLVENT CDCl3  
 NS 764  
 DS 4  
 SMH 30303.031 Hz  
 FIDRES 0.462388 Hz  
 AQ 1.0813940 sec  
 RG 8192  
 DM 16.500 usec  
 DE 4.50 usec  
 TE 300.0 K  
 D1 0.2500000 sec  
 D11 0.0300000 sec

----- CHANNEL f1 -----  
 NUC1 13C  
 P1 26.50 usec  
 PL1 -6.00 dB  
 SF01 125.7942048 MHz

----- CHANNEL f2 -----  
 CPDPRG2 waltz16  
 NUC2 1H  
 PCPD2 80.00 usec  
 PL2 -1.00 dB  
 PL12 14.40 dB  
 SF02 500.2230013 MHz

F2 - Processing parameters  
 SI 65536  
 SF 125.7804285 MHz  
 NDM EN  
 SSB 0  
 LB 1.00 Hz  
 GB 0  
 PC 2.00

10 NMR plot parameters  
 CX 22.80 cm  
 F1P 200.000 ppm  
 F1 25156.09 Hz  
 F2P 0.000 ppm  
 F2 0.00 Hz  
 PPMCM 8.77193 ppm/cm  
 HZCM 1103.33716 Hz/cm

1H spectrum

ppm

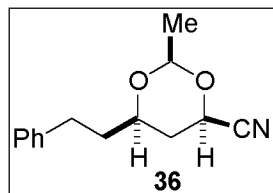

7.31701  
7.31371  
7.30575  
7.30237  
7.29463  
7.28922  
7.28585  
7.28281  
7.28005  
7.21177  
7.20989  
7.19909  
7.19546  
7.19002  
7.18895  
7.18737  
7.18314  
7.17367  
7.17258

4.68793  
4.67763  
4.67475  
4.67175  
4.64428  
4.50858  
4.49057  
4.48458

3.57571  
3.57288  
3.56785  
3.56331  
3.55853  
3.55366  
3.55065

2.77488  
2.76784  
2.75678  
2.72511  
2.70970  
2.69730  
2.69069

1.95337  
1.92657  
1.94644  
1.94053  
1.93654  
1.92454  
1.91856  
1.91299  
1.91012  
1.90764

1.89052  
1.88691  
1.86442  
1.81435  
1.80532  
1.80094  
1.79077  
1.78706  
1.78039  
1.77477  
1.77223  
1.76964  
1.59759  
1.40852  
1.39841

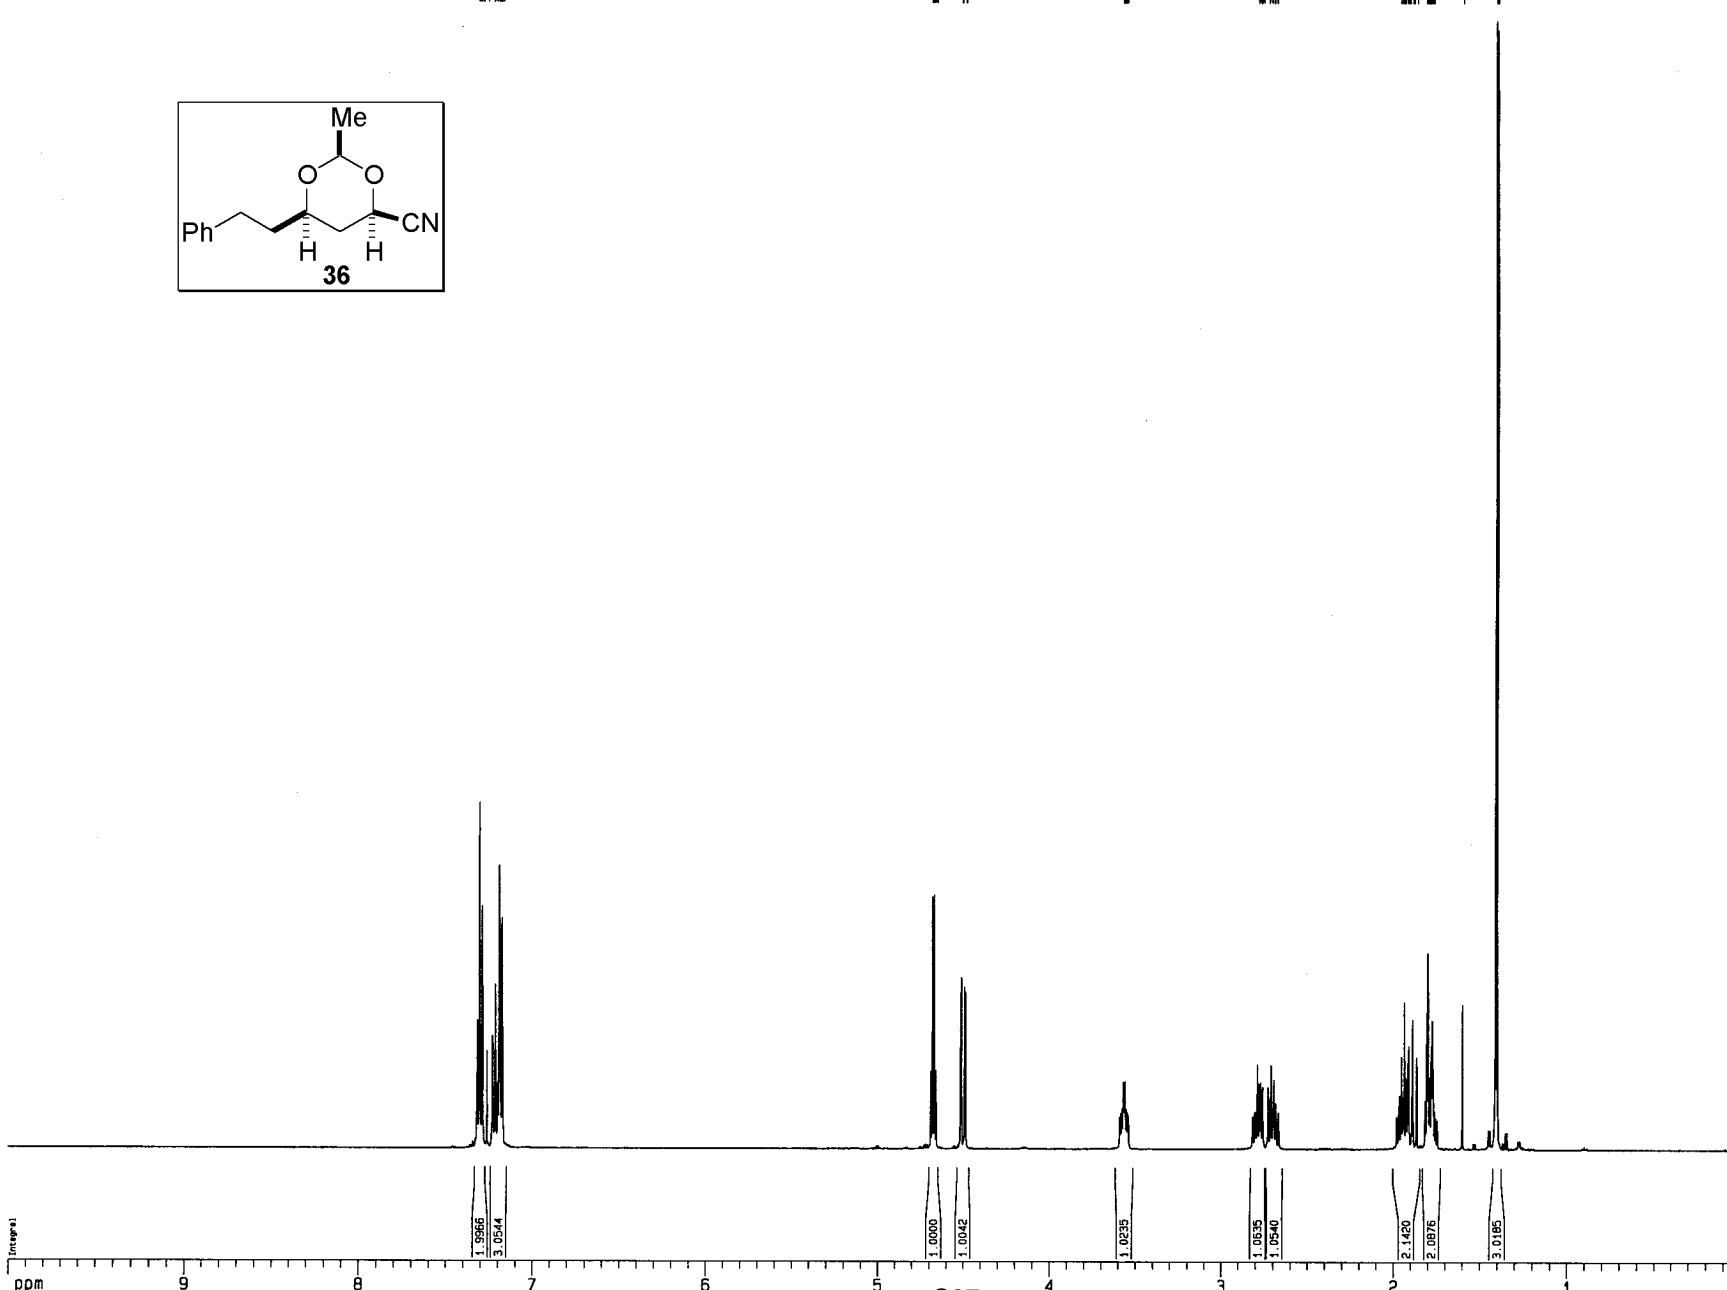

Current Data Parameters  
USER lacruz  
NAME TL-1-1451ow  
EXPNO 1  
PROCNO 1

F2 - Acquisition Parameters  
Date\_ 20021207  
Time 18.22  
INSTRUM omega500  
PROBHD 5 mm broadband  
PULPROG zg30  
TD 65936  
SOLVENT CDCl3  
NS 8  
DS 2  
SMH 8012.820 Hz  
FIDRES 0.122266 Hz  
AQ 4.0894966 sec  
RG 64  
DM 62.400 usec  
DE 6.00 usec  
TE 300.0 K  
D1 0.10000000 sec

----- CHANNEL f1 -----  
NUC1 1H  
P1 13.00 usec  
PL1 -1.00 dB  
SFO1 500.2235015 MHz

F2 - Processing parameters  
SI 65936  
SF 500.2200312 MHz  
WDW no  
SSB 0  
LB 0.00 Hz  
GB 0  
PC 4.00

1D NMR plot parameters  
CX 22.80 cm  
F1P 10.000 ppm  
F1 5002.20 Hz  
F2P 0.000 ppm  
F2 0.00 Hz  
PPMCH 0.43860 ppm/cm  
HZCW 219.39476 Hz/cm

S37

13C spectrum with 1H decoupling

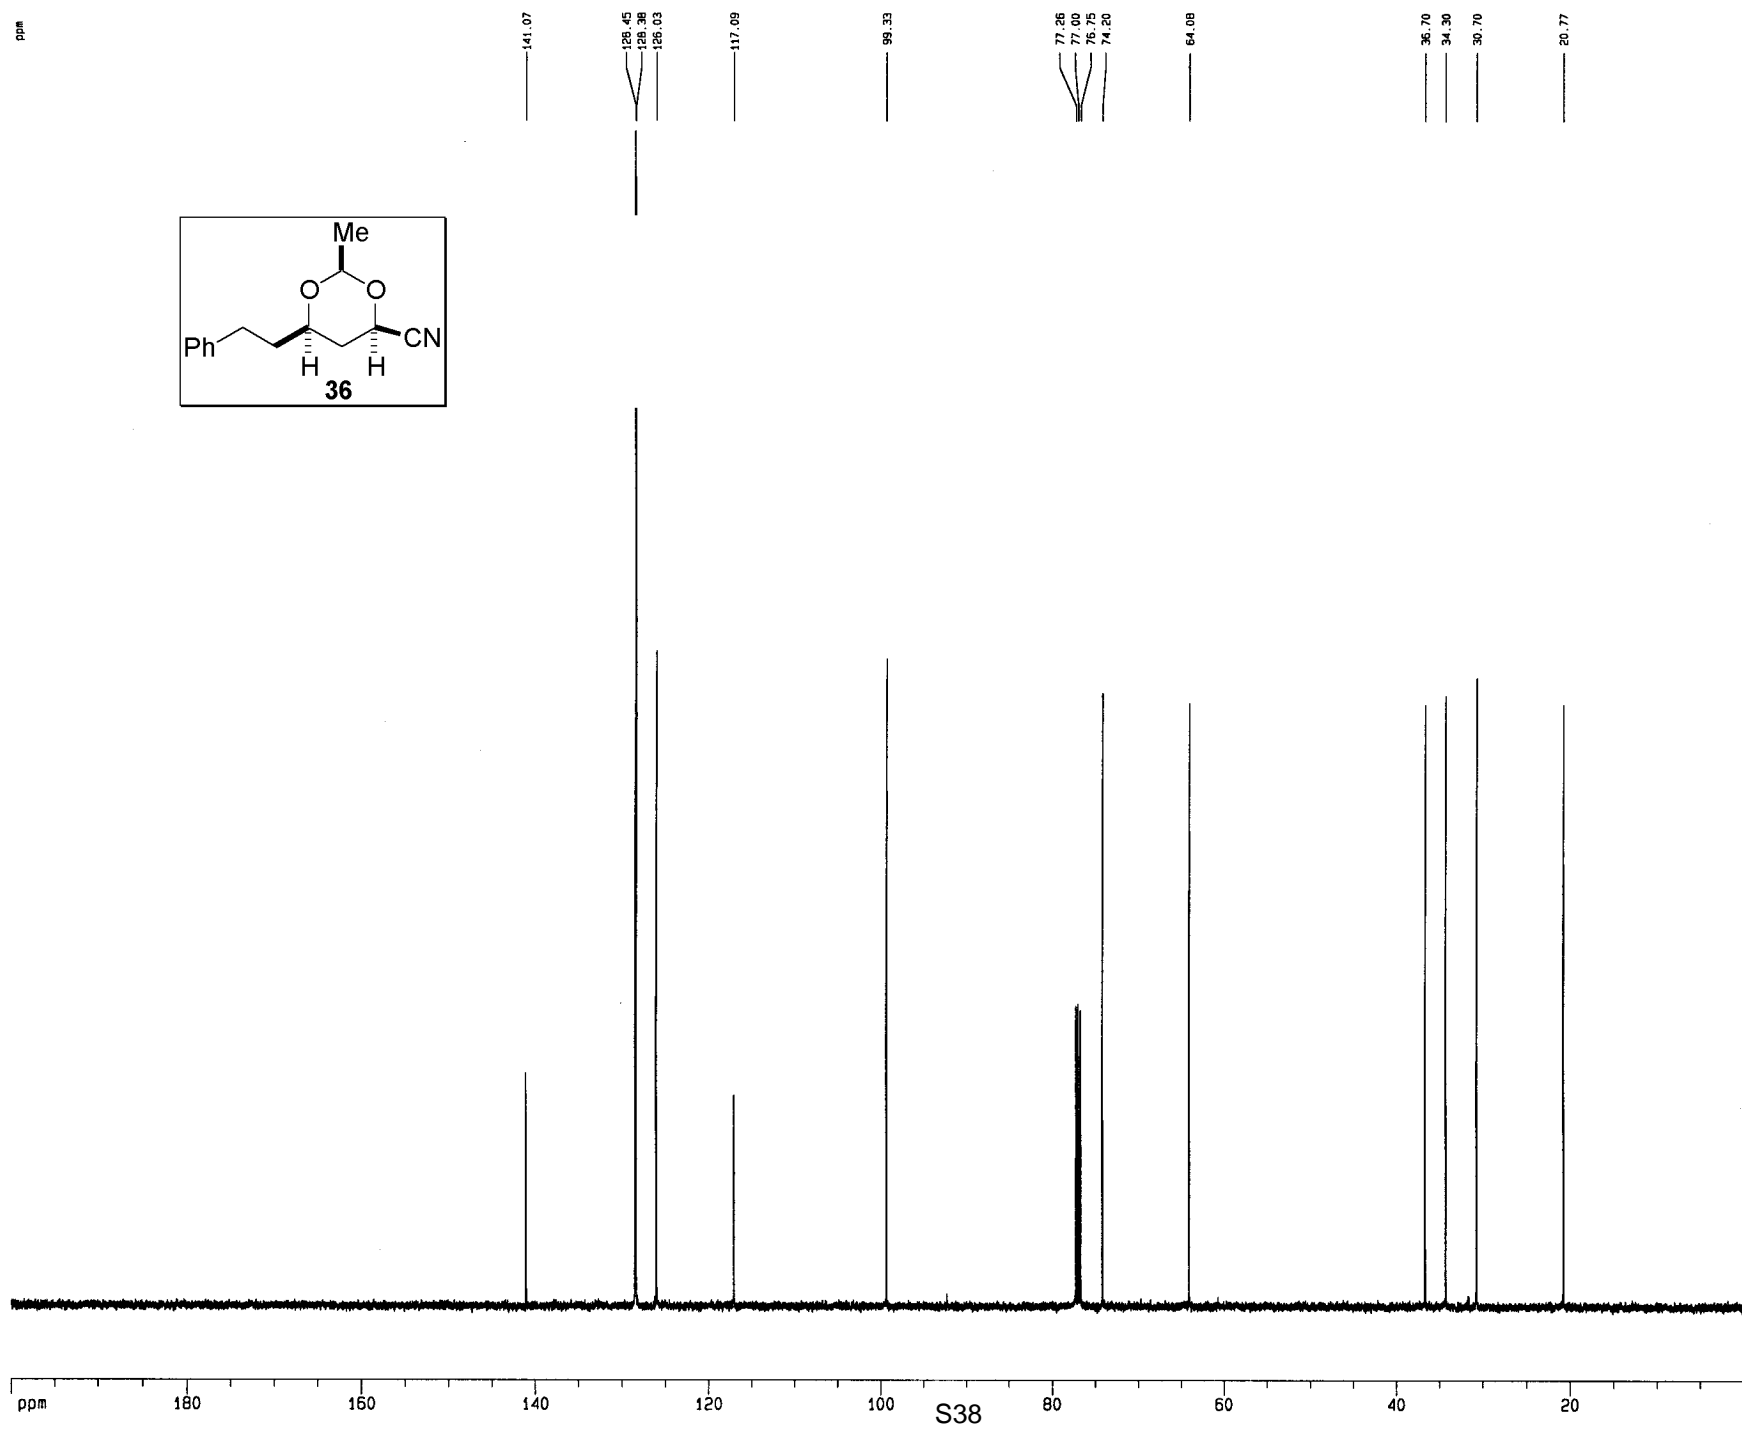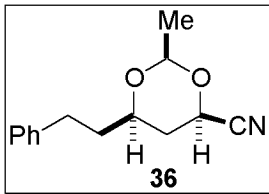

```

Current Data Parameters
USER      lacruz
NAME      TL-1-145lowcar
EXPNO     1
PROCNO    1

F2 - Acquisition Parameters
Date_     20021207
Time      18.38
INSTRUM   omega500
PROBHD    5 mm broadband
PULPROG   zgpg30
TD         65536
SOLVENT   CDCl3
NS         749
DS         4
SINH       30303.031 Hz
FIDRES    0.462388 Hz
AQ         1.0813940 sec
RG         6502
DM         16.500 usec
DE         4.50 usec
TE         300.0 K
D1         0.25000000 sec
D11        0.03000000 sec

----- CHANNEL f1 -----
NUC1       13C
P1         29.00 usec
PL1        -6.00 dB
SFO1       125.7942048 MHz

----- CHANNEL f2 -----
CPDPRG2   waltz16
NUC2       1H
PCPD2     80.00 usec
PL2        120.00 dB
PL12       14.40 dB
SFO2       500.2230013 MHz

F2 - Processing parameters
SI         65536
SF         125.7804346 MHz
WDW        EM
SSB        0
LB         1.00 Hz
GB         0
PC         2.00

1D NMR plot parameters
CX         22.80 cm
FIP        200.000 ppm
F1         25156.09 Hz
F2P        0.000 ppm
F2         0.00 Hz
PPMCM      8.77193 ppm/cm
HZCM       1103.33716 Hz/cm
    
```

1H spectrum

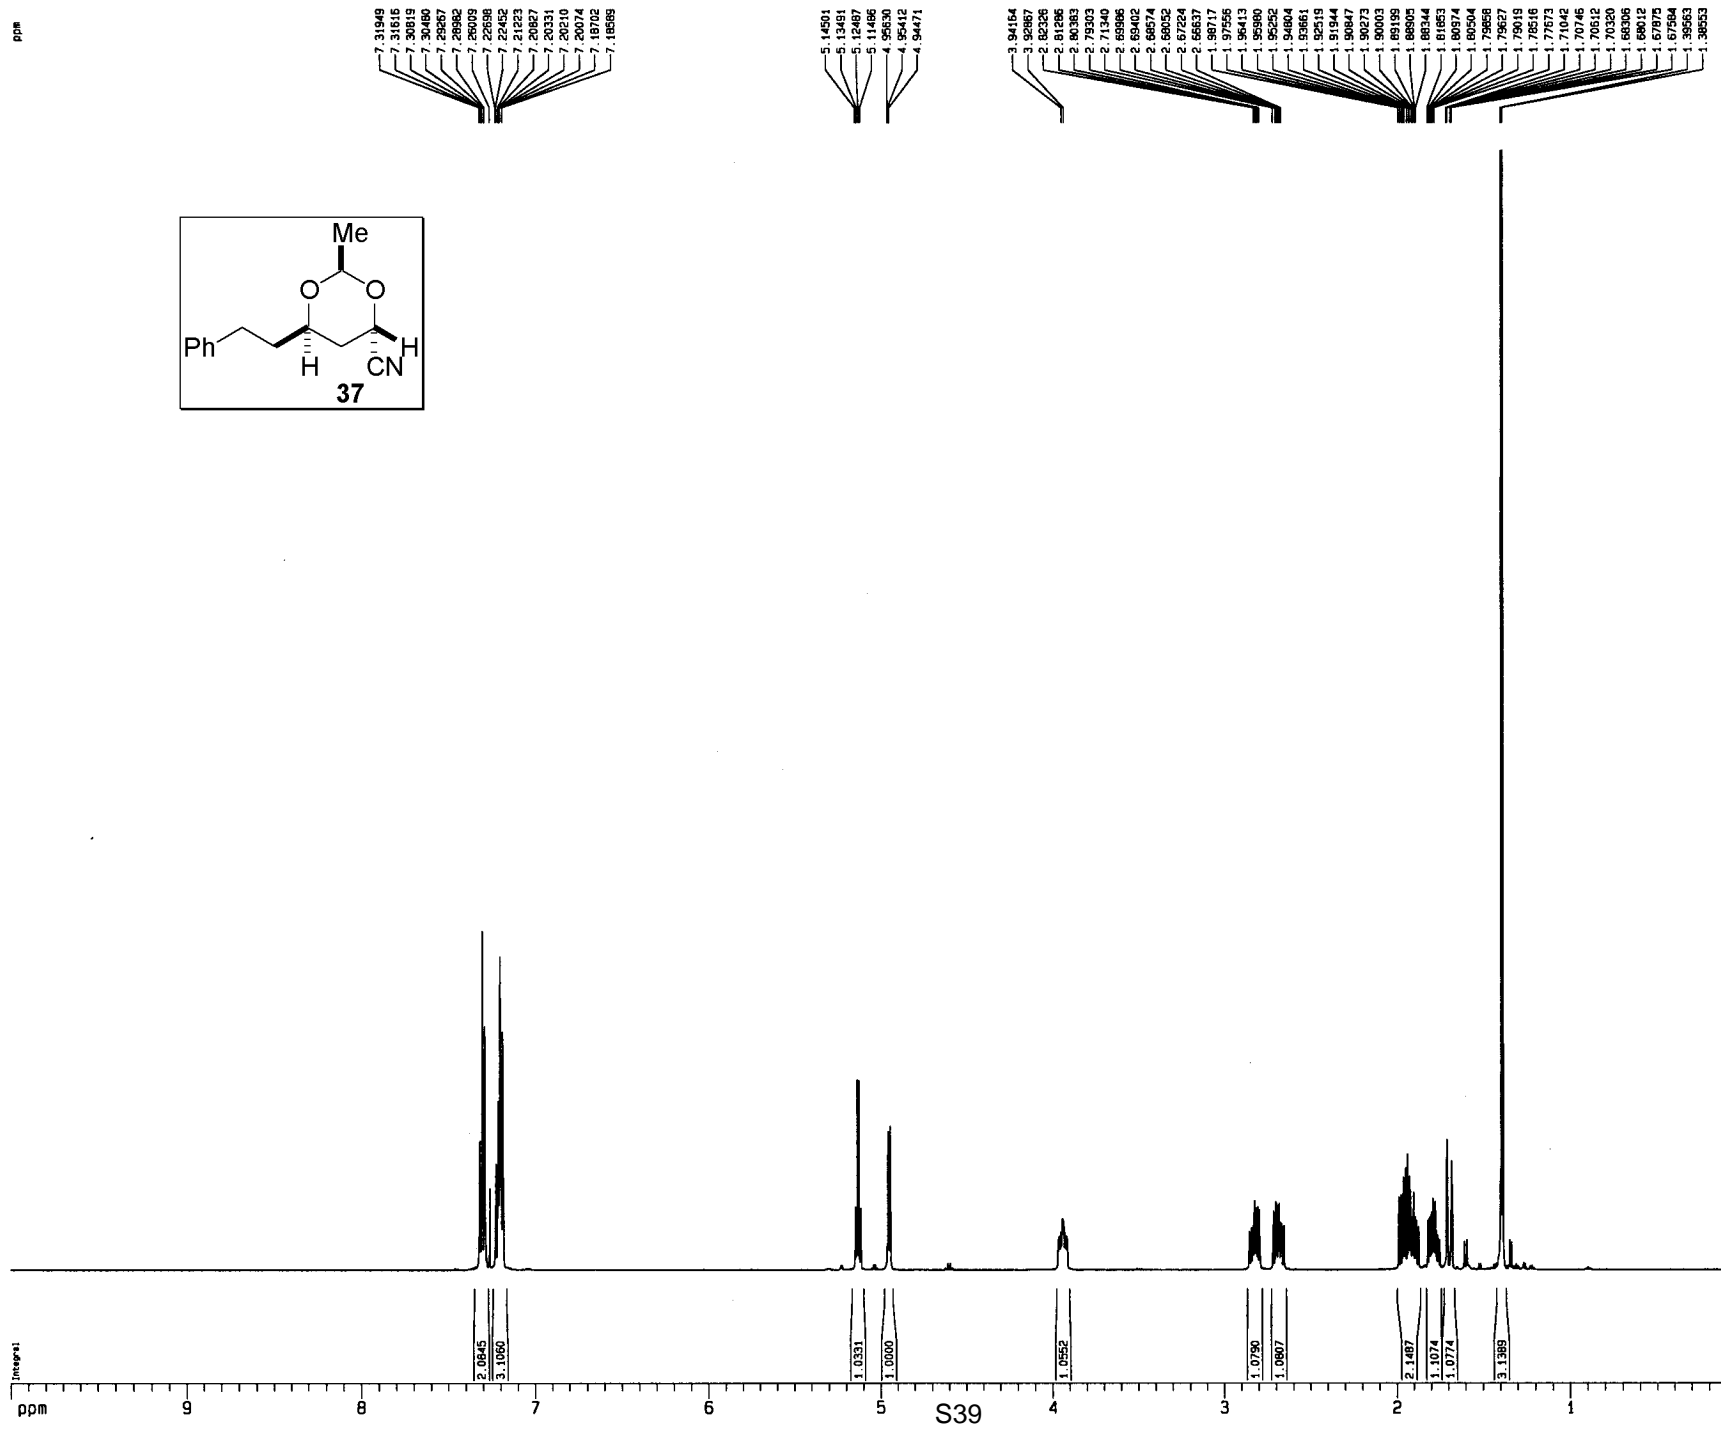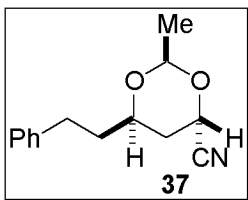

```

Current Data Parameters
USER          lacruz
NAME          teat1a
EXPNO        1
PROCNO       1

F2 - Acquisition Parameters
Date_        20030228
Time         19.08
INSTRUM      omega500
PROBHD       5 mm broadband
PULPROG      zg30
TD           65536
SOLVENT      CDCl3
NS           8
DS           2
SWH          8012.820 Hz
FIDRES       0.122266 Hz
AQ           4.0894966 sec
RG           128
DM           62.400 usec
DE           6.00 usec
TE           300.0 K
D1           0.10000000 sec

----- CHANNEL f1 -----
NUC1         1H
P1           13.00 usec
PL1          -1.00 dB
SF01         500.2235015 MHz

F2 - Processing parameters
SI           65536
SF           500.2200310 MHz
WDW          no
SSB          0
LB           0.00 Hz
GB           0
PC           4.00

1D NMR plot parameters
CX           22.80 cm
F1P          10.000 ppm
F1           5002.20 Hz
F2P          0.000 ppm
F2           0.00 Hz
PPMCH       0.43860 ppm/cm
HZCM        219.39476 Hz/cm
    
```

13C spectrum with 1H decoupling

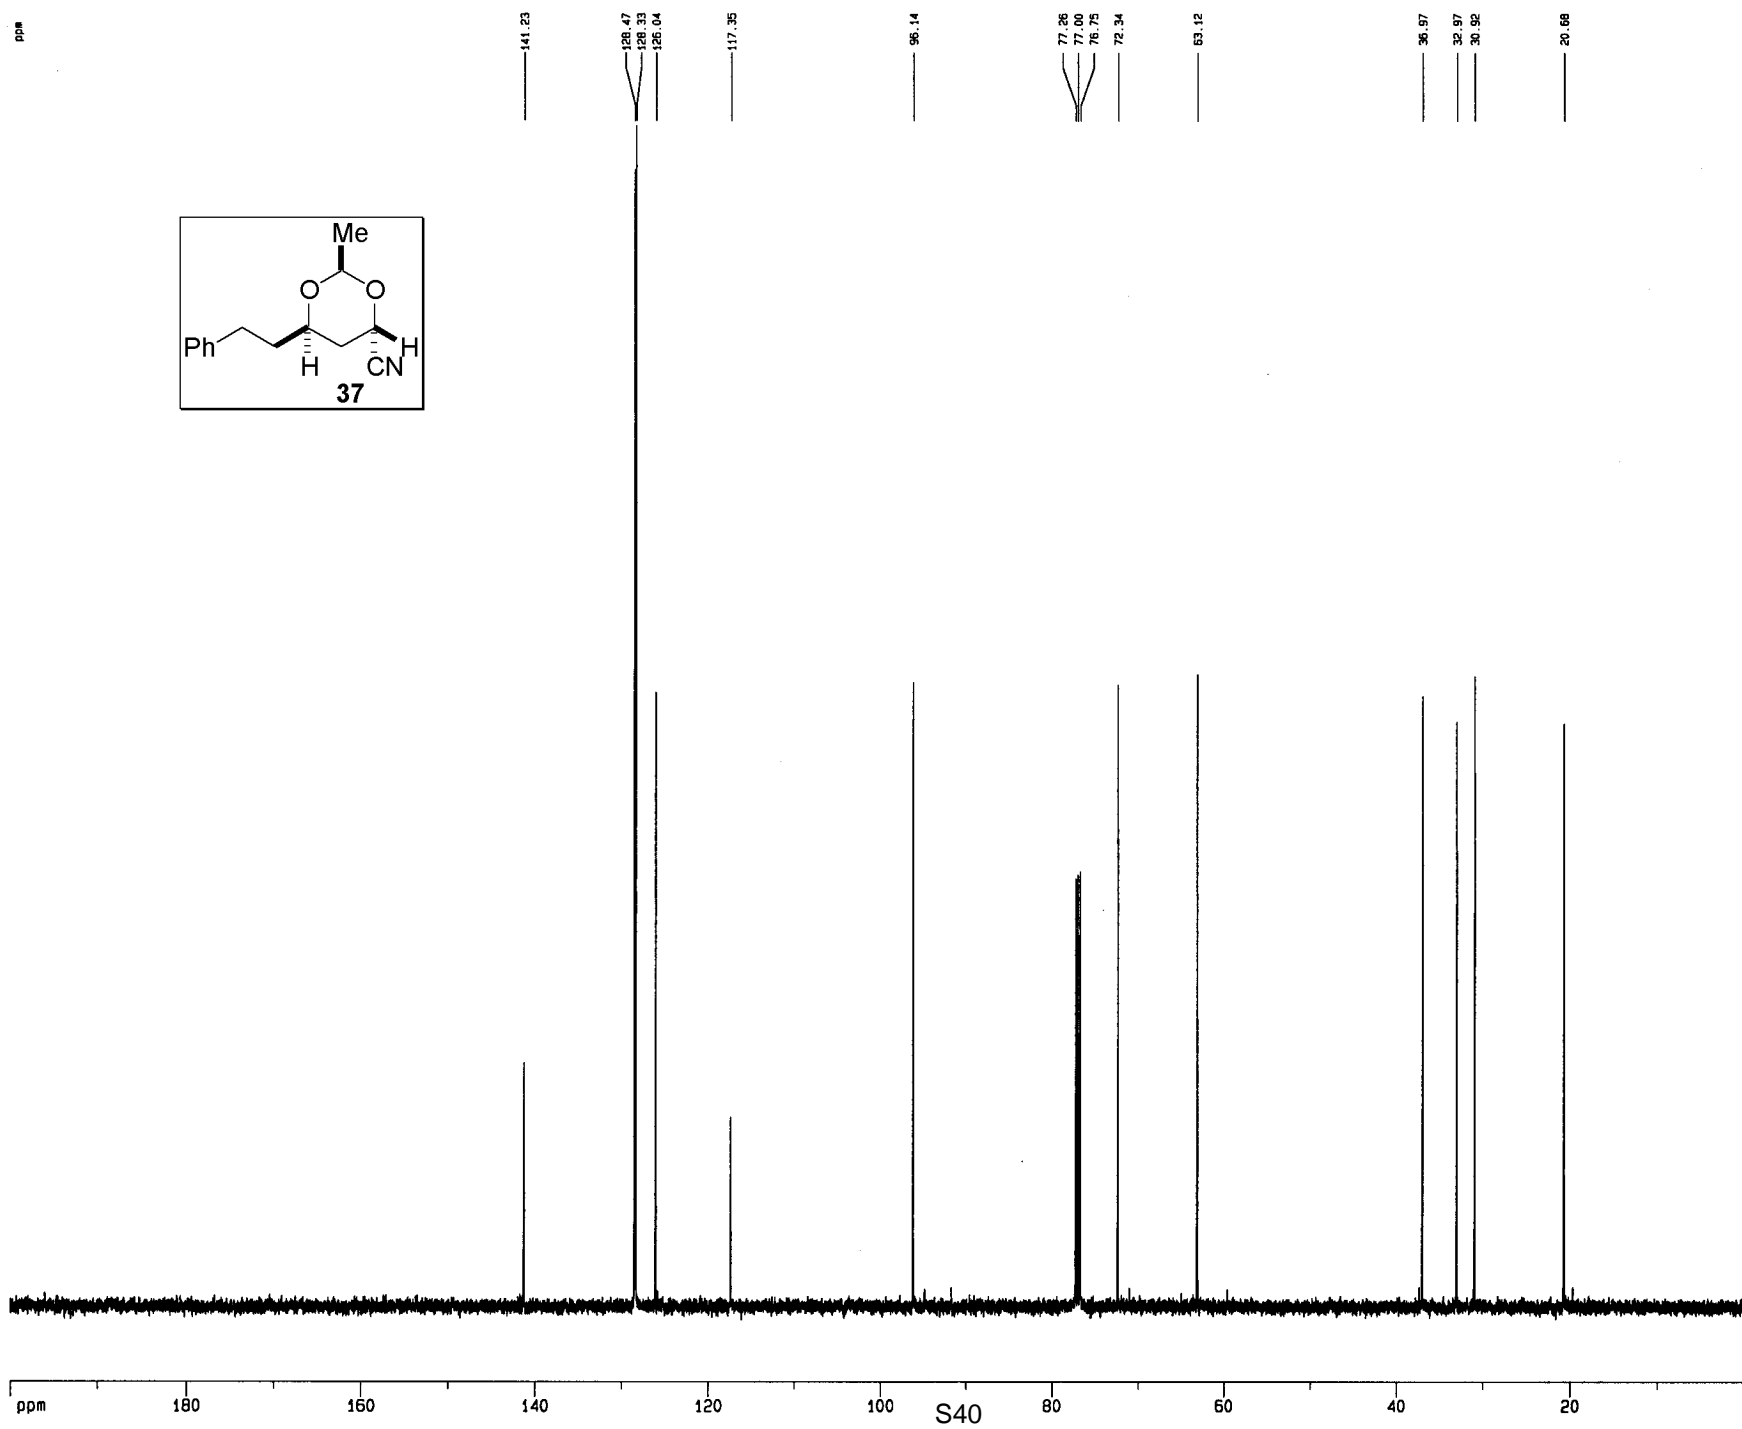

```

Current Data Parameters
USER      lacruz
NAME      t1-1-165upcarb
EXPNO     1
PROCNO    1

F2 - Acquisition Parameters
Date_     20030228
Time      19.37
INSTRUM   omega500
PROBHD    5 mm broadband
PULPROG   zgpg30
TD         65536
SOLVENT   DMS-d6
NS         569
DS         4
SMH        30303.031 Hz
FIDRES     0.462388 Hz
AQ         1.0813940 sec
RG         4597.6
DM         16.500 usec
DE         4.50 usec
TE         300.0 K
D1         0.25000000 sec
D11        0.03000000 sec

----- CHANNEL f1 -----
NUC1       13C
P1         26.50 usec
PL1        -6.00 dB
SFO1       125.7942048 MHz

----- CHANNEL f2 -----
CPDPRG2   waltz16
NUC2       1H
PCPD2      80.00 usec
PL2        -1.00 dB
PL12       14.40 dB
SFO2       500.2230013 MHz

F2 - Processing parameters
SI         65536
SF         125.7804318 MHz
WDW        EM
SSB        0
LB         1.00 Hz
GB         0
PC         2.00

1D NMR plot parameters
CX         22.80 cm
FIP        200.000 ppm
F1         25156.09 Hz
F2P        0.000 ppm
F2         0.00 Hz
PPMCM      8.77193 ppm/cm
HZCM       1103.33716 Hz/cm
    
```



<sup>1</sup>H spectrum

ppm

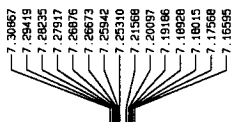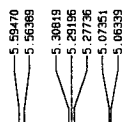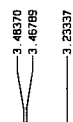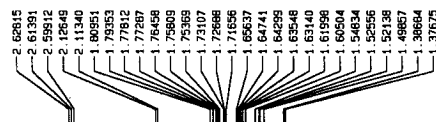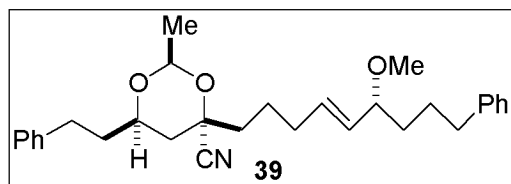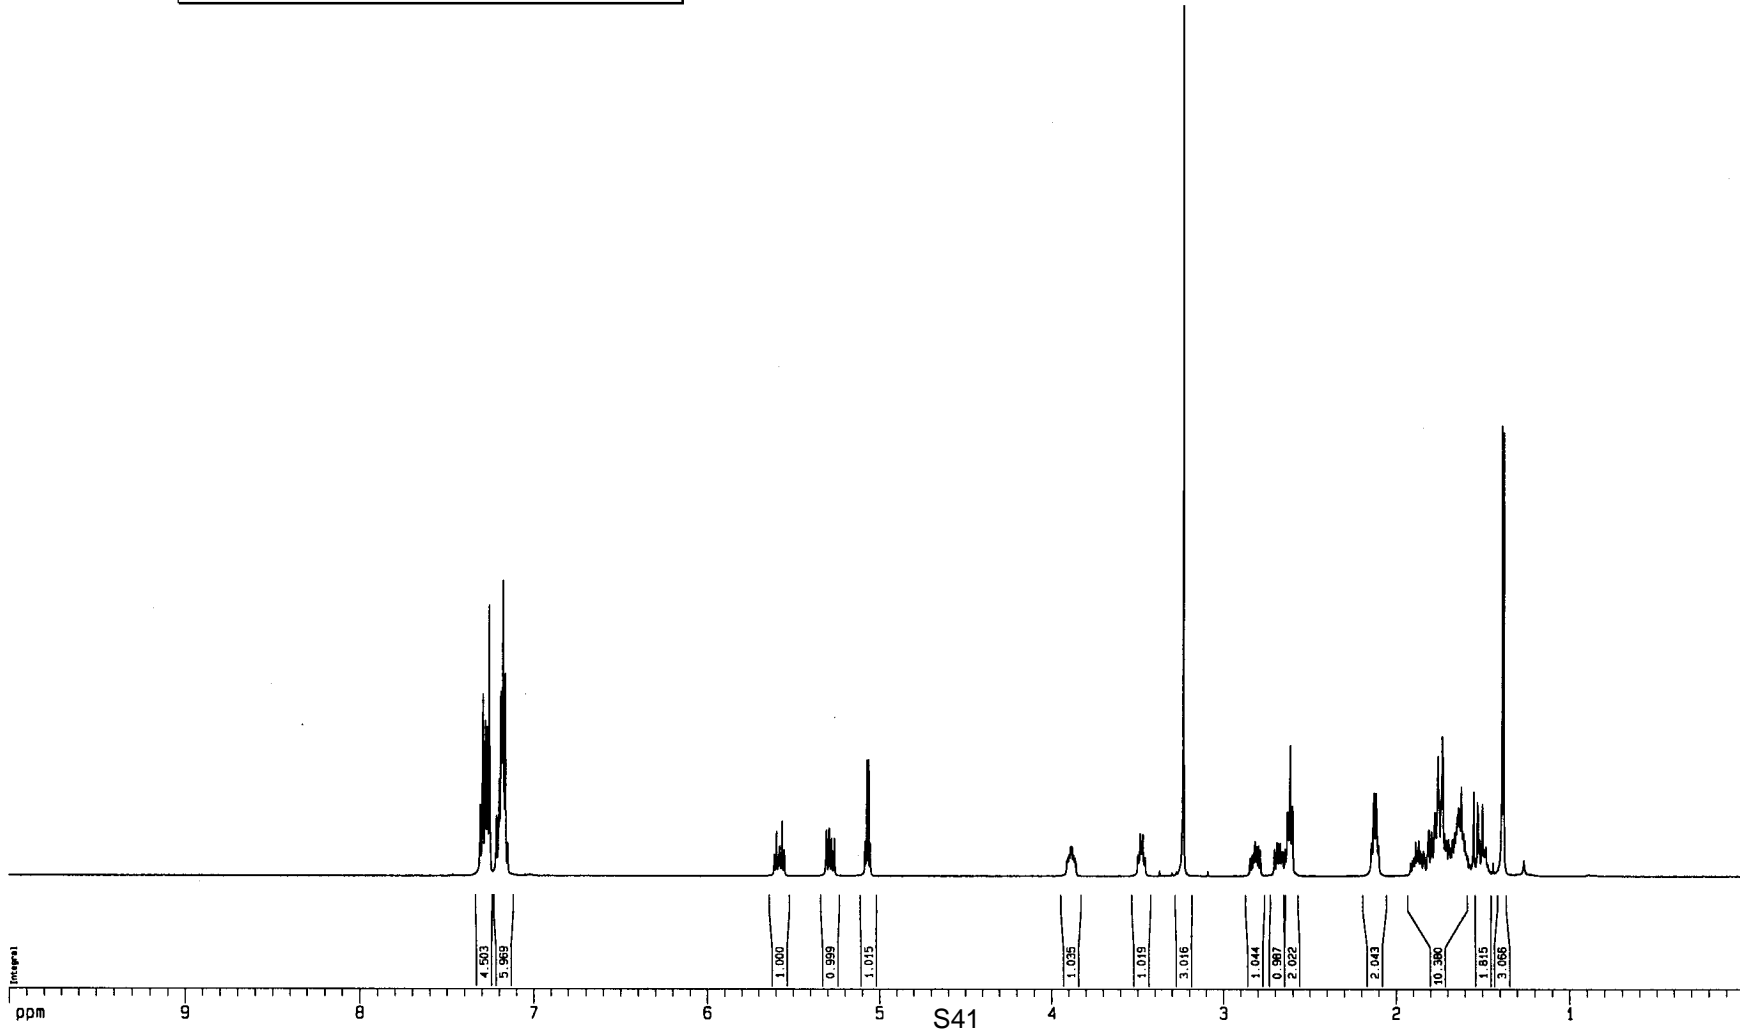

Current Data Parameters  
 USER lacruz  
 NAME t1-1-169  
 EXPNO 1  
 PROCNO 1

F2 - Acquisition Parameters  
 Date\_ 20030210  
 Time 19.10  
 INSTRUM omega500  
 PROBHD 5 mm broadband  
 PULPROG zg30  
 TD 65536  
 SOLVENT CDCl3  
 NS 8  
 DS 2  
 SWH 8012.820 Hz  
 FIDRES 0.122266 Hz  
 AQ 4.0894966 sec  
 RG 203.2  
 DM 62.400 usec  
 DE 6.00 usec  
 TE 300.0 K  
 D1 0.1000000 sec

\*\*\*\*\* CHANNEL f1 \*\*\*\*\*  
 NUC1 <sup>1</sup>H  
 P1 13.00 usec  
 PL1 -1.00 dB  
 SF01 500.2235015 MHz

F2 - Processing parameters  
 SI 65536  
 SF 500.2200313 MHz  
 WDW EM  
 SSB 0  
 LB 0.30 Hz  
 GB 0  
 PC 4.00

1D NMR plot parameters  
 CX 22.80 cm  
 F1P 10.000 ppm  
 F1 5002.20 Hz  
 F2P 0.000 ppm  
 F2 0.00 Hz  
 PPMCM 0.43860 ppm/cm  
 HZCM 219.39476 Hz/cm

13C spectrum with 1H decoupling

ppm

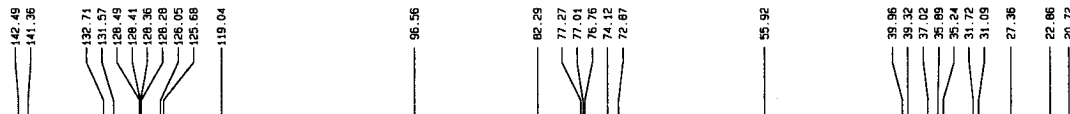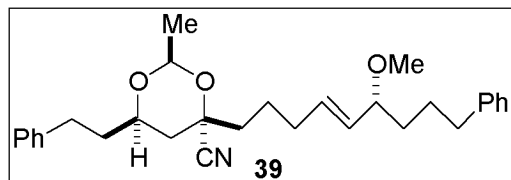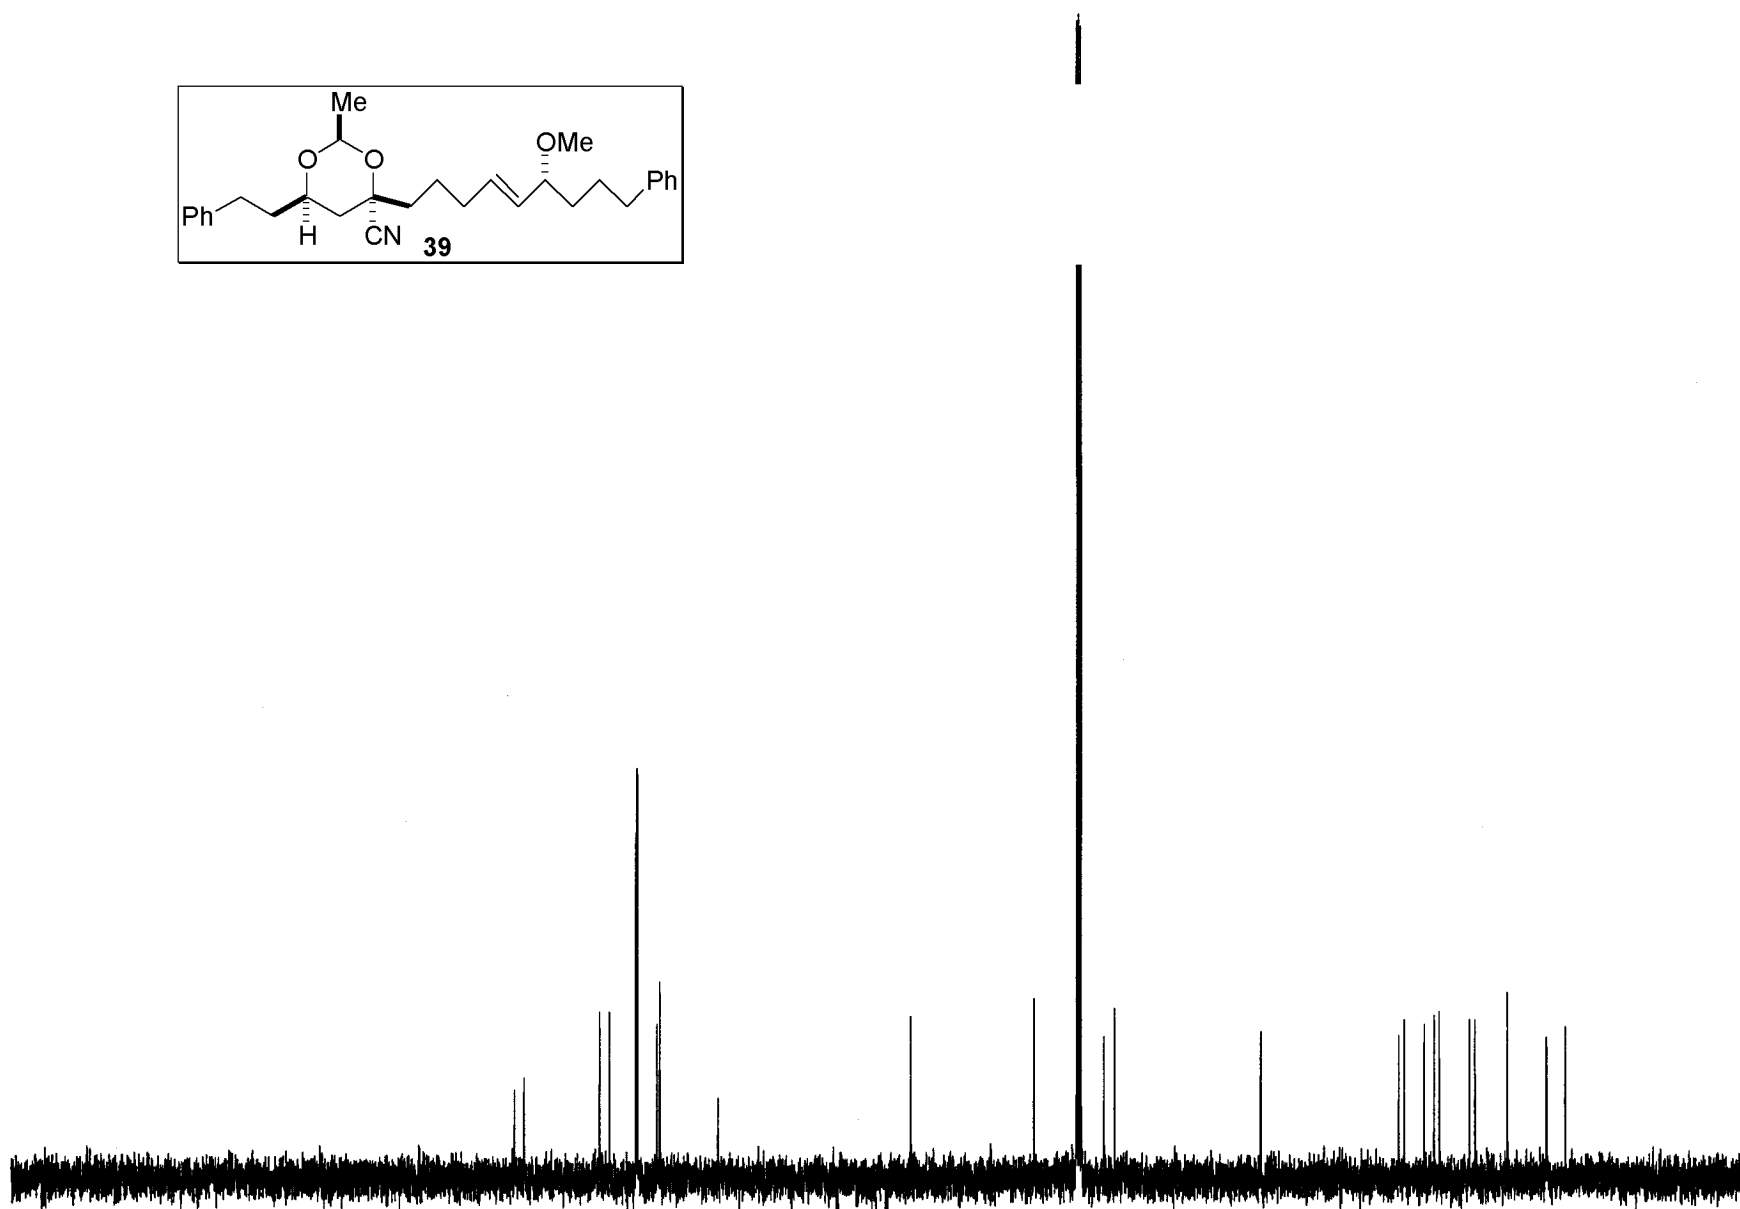

ppm 180 160 140 120 100 S42 80 60 40 20

Current Data Parameters  
USER lacruz  
NAME t1-1-169carbon  
EXPNO 1  
PROCNO 1

F2 - Acquisition Parameters  
Date\_ 20030210  
Time 19.25  
INSTRUM omega500  
PROBHD 5 mm broadband  
PULPROG zgpg30  
TD 65536  
SOLVENT CDCl3  
NS 590  
DS 4  
SWH 30303.031 Hz  
FIDRES 0.462388 Hz  
AQ 1.0813940 sec  
RG 5150.6  
DM 15.500 usec  
DE 4.50 usec  
TE 300.0 K  
D1 0.2500000 sec  
D11 0.0300000 sec

----- CHANNEL f1 -----  
NUC1 13C  
P1 26.50 usec  
PL1 -6.00 dB  
SFO1 125.7942048 MHz

----- CHANNEL f2 -----  
CPDPRG2 waltz16  
NUC2 1H  
PCPD2 80.00 usec  
PL2 -1.00 dB  
PL12 14.40 dB  
SFO2 500.2230013 MHz

F2 - Processing parameters  
SI 65536  
SF 125.7804253 MHz  
WDW EM  
SSB 0  
LB 1.00 Hz  
GB 0  
PC 2.00

10 NMR plot parameters  
CX 22.80 cm  
F1P 200.000 ppm  
F1 25355.09 Hz  
F2P 0.000 ppm  
F2 0.00 Hz  
PPMCM 8.77193 ppm/cm  
HZCM 1103.33716 Hz/cm

1H spectrum

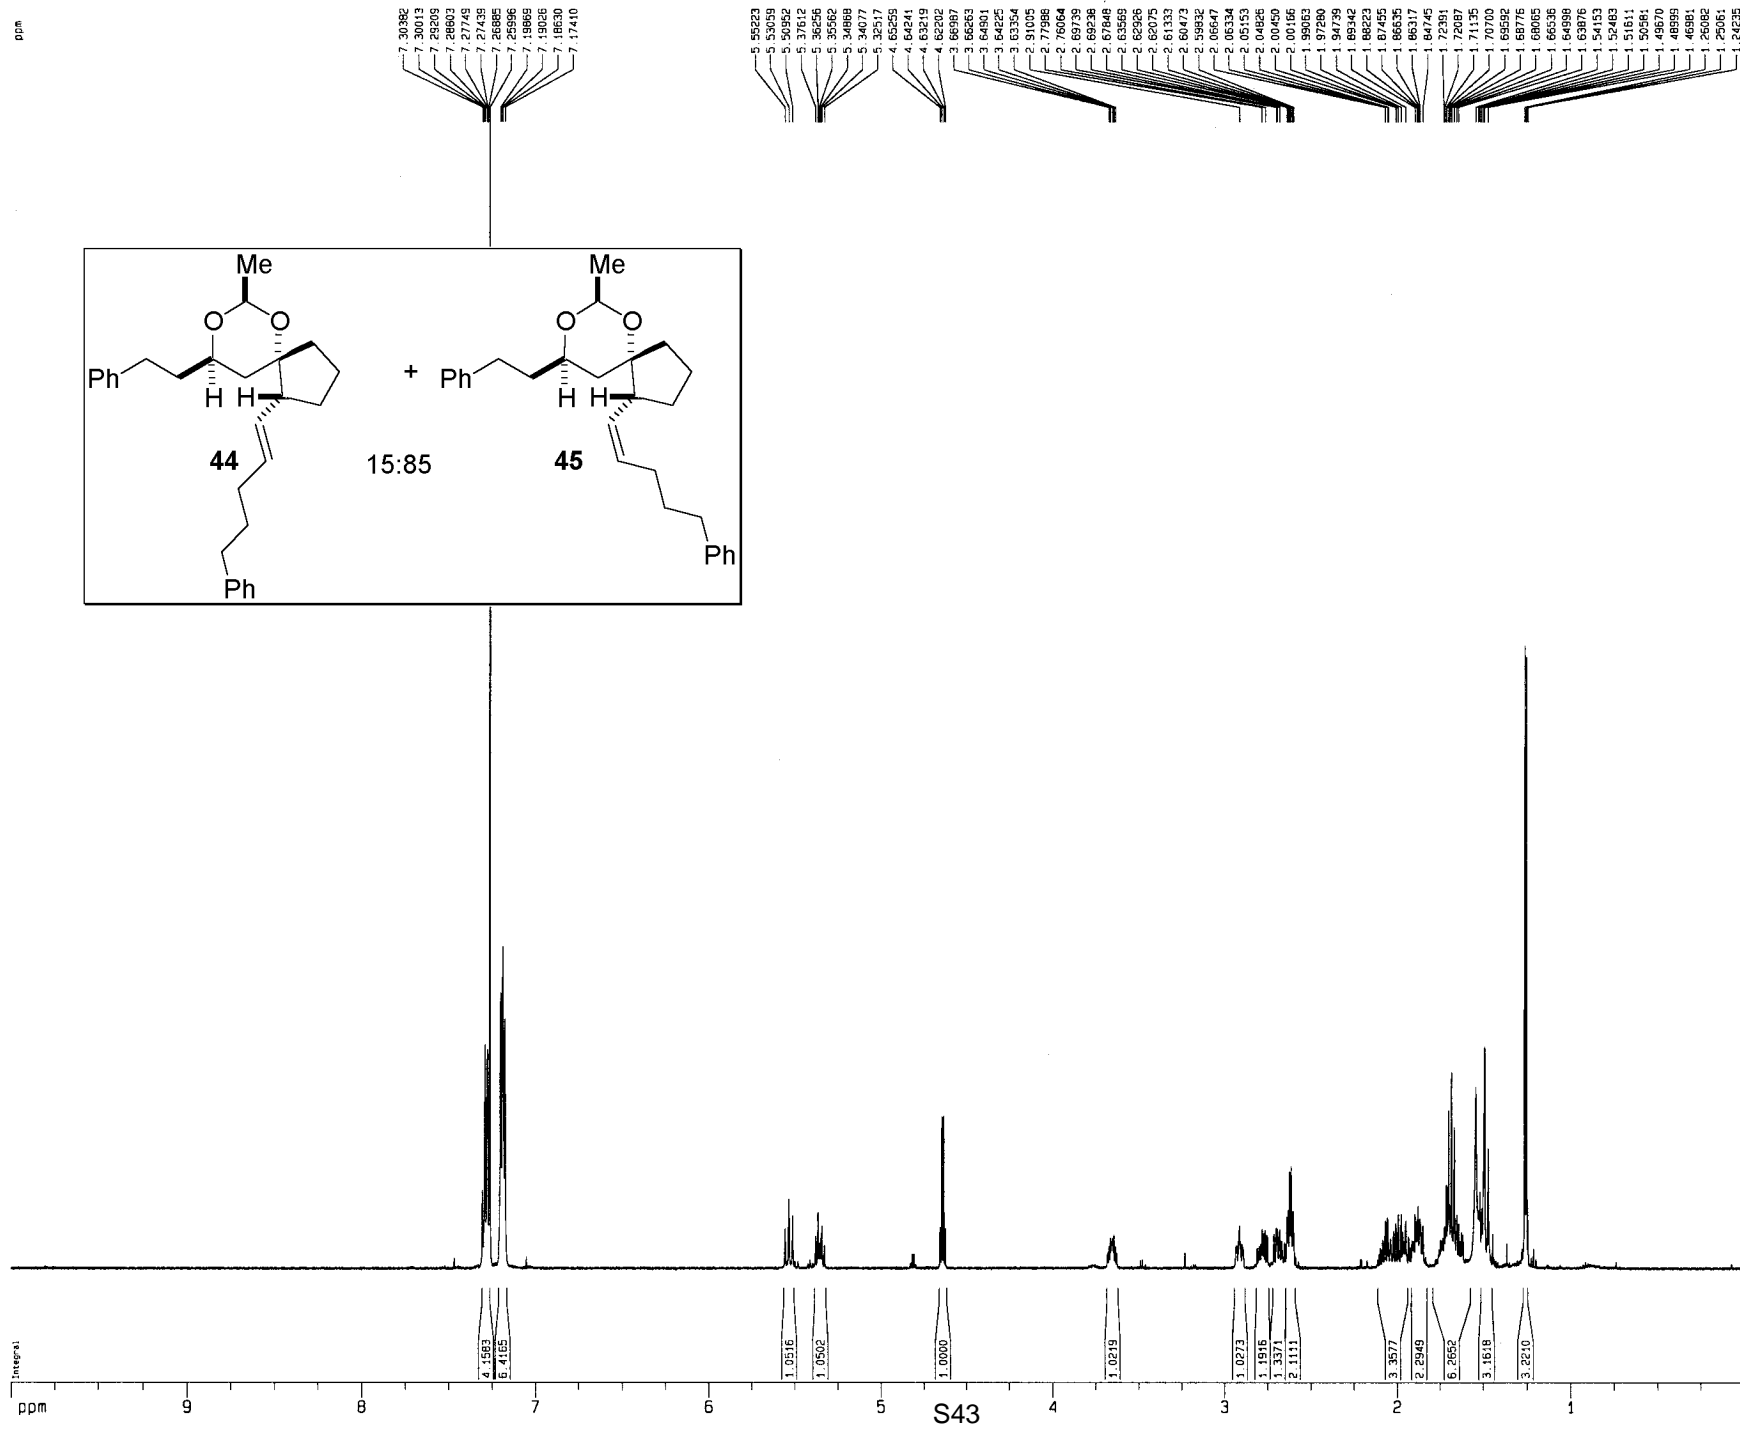

Current Data Parameters  
 USER lacruz  
 NAME tl-1-177pure  
 EXPNO 2  
 PROCNO 1

F2 - Acquisition Parameters  
 Date\_ 20030215  
 Time 16.18  
 INSTRUM omega500  
 PROBHD 5 mm broadband  
 PULPROG zg30  
 TD 65536  
 SOLVENT CDCl3  
 NS 32  
 DS 2  
 SWH 6012.820 Hz  
 FIDRES 0.122266 Hz  
 AQ 4.0894966 sec  
 RG 574.7  
 DW 62.400 usec  
 DE 6.00 usec  
 TE 300.0 K  
 D1 0.1000000 sec

\*\*\*\*\* CHANNEL f1 \*\*\*\*\*  
 NUC1 1H  
 P1 13.00 usec  
 PL1 -1.00 dB  
 SF01 500.2235015 MHz

F2 - Processing parameters  
 SI 65536  
 SF 500.2200312 MHz  
 WDW no  
 SSB 0  
 LB 0.00 Hz  
 GB 0  
 PC 4.00

1D NMR plot parameters  
 CX 22.80 cm  
 F1P 10.000 ppm  
 F1 5002.20 Hz  
 F2P 0.000 ppm  
 F2 0.00 Hz  
 PPMCM 0.43860 ppm/cm  
 HZCM 219.39476 Hz/cm

13C spectrum with 1H decoupling

ppm

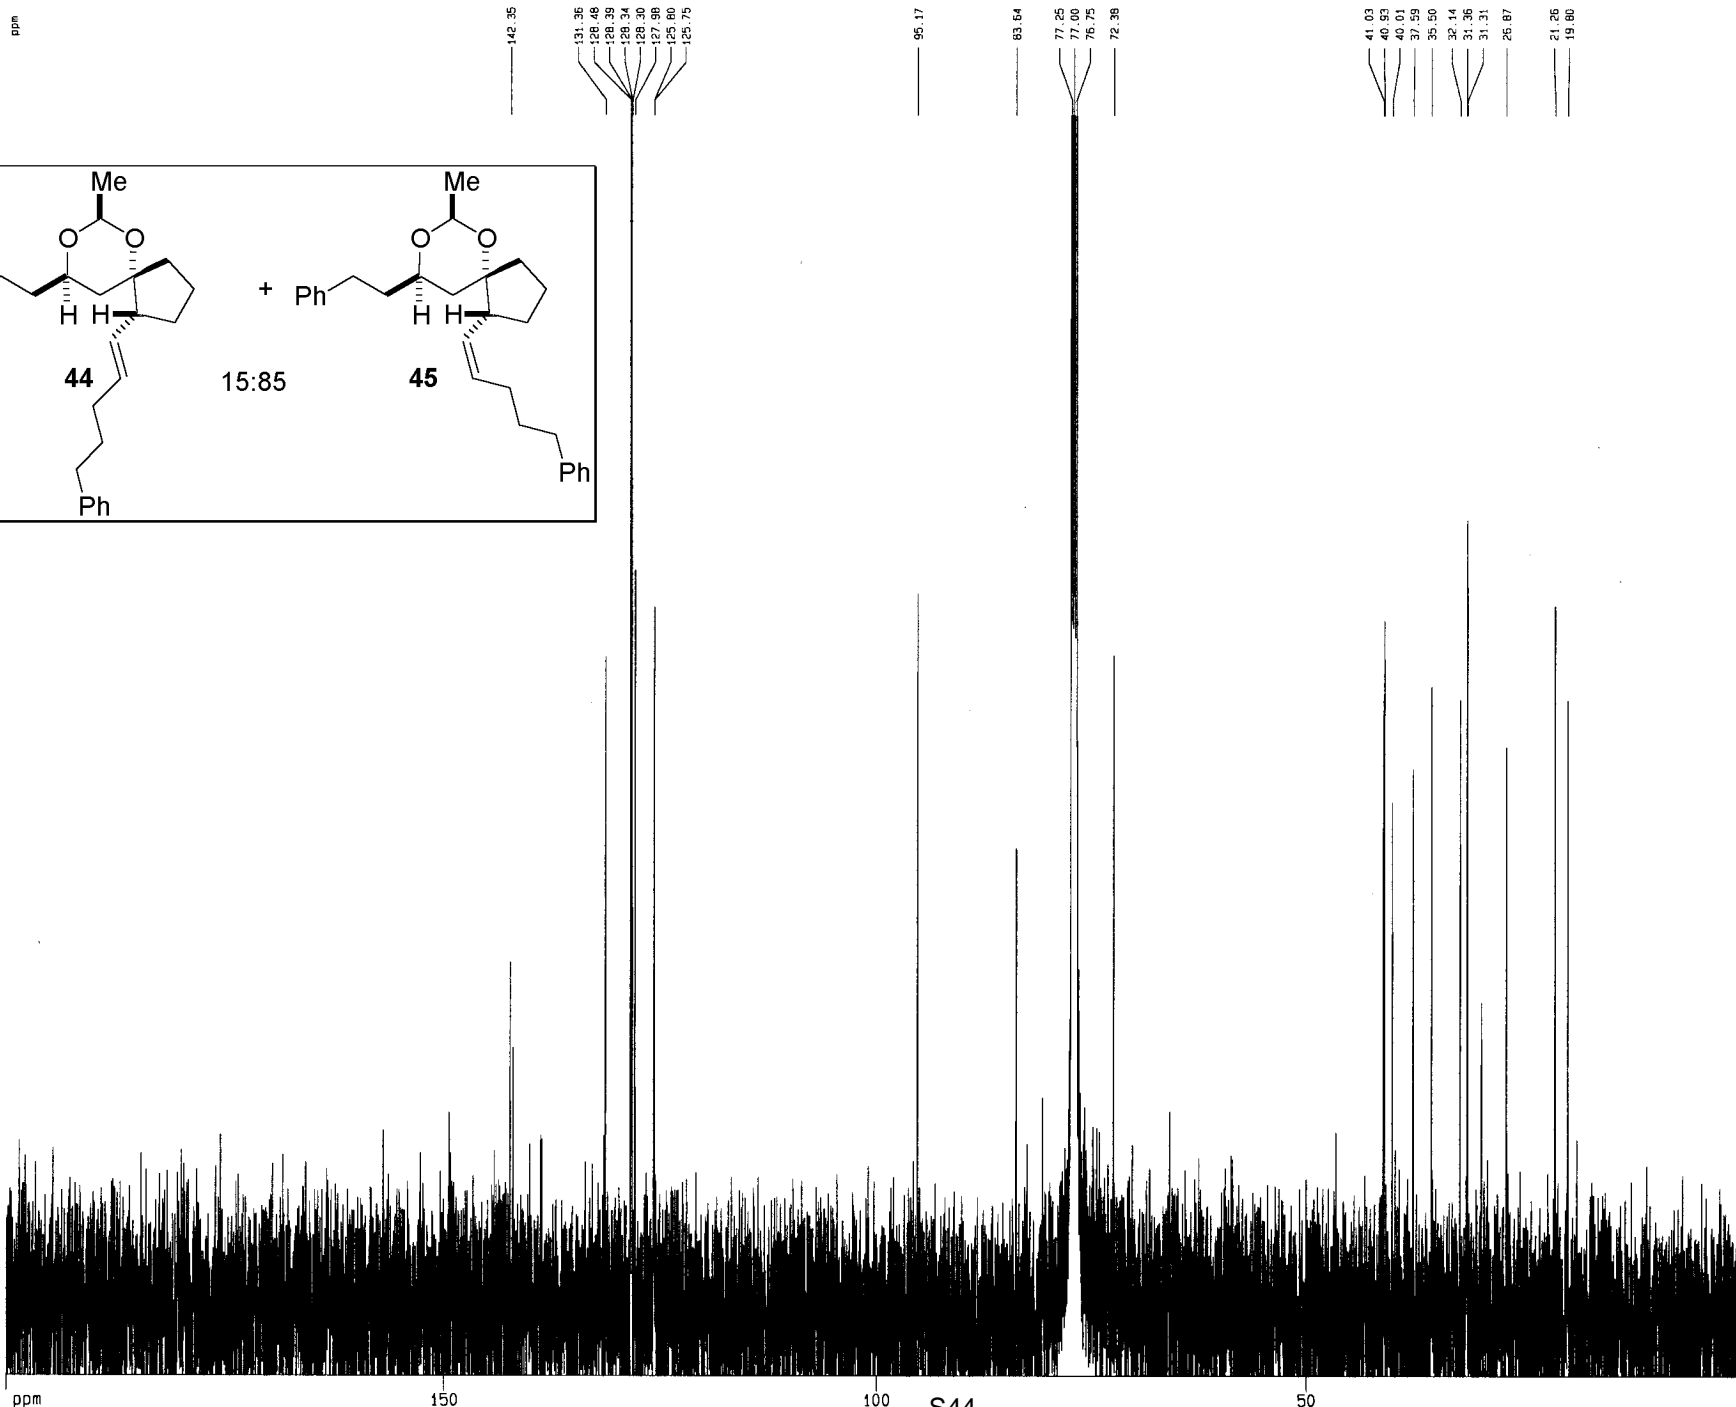

ppm

150

100

S44

50

142.35  
 131.36  
 128.46  
 126.39  
 124.34  
 122.30  
 120.26  
 118.22  
 116.18  
 114.14  
 112.10  
 110.06  
 108.02  
 106.00  
 104.00  
 102.00  
 100.00  
 98.00  
 96.00  
 94.00  
 92.00  
 90.00  
 88.00  
 86.00  
 84.00  
 82.00  
 80.00  
 78.00  
 76.00  
 74.00  
 72.00  
 70.00  
 68.00  
 66.00  
 64.00  
 62.00  
 60.00  
 58.00  
 56.00  
 54.00  
 52.00  
 50.00  
 48.00  
 46.00  
 44.00  
 42.00  
 40.00  
 38.00  
 36.00  
 34.00  
 32.00  
 30.00  
 28.00  
 26.00  
 24.00  
 22.00  
 20.00  
 18.00  
 16.00  
 14.00  
 12.00  
 10.00  
 8.00  
 6.00  
 4.00  
 2.00  
 0.00

```

Current Data Parameters
USER          lacruz
NAME         t1-1-176carbo
EXPNO        1
PROCNO       1

F2 - Acquisition Parameters
Date_        20030209
Time         7.54
INSTRUM      omega500
PROBHD       5 mm broadband
PULPROG      zgdc30
TD           65536
SOLVENT      CDCl3
NS           21504
DS           4
SWH          30303.031 Hz
FIDRES       0.462388 Hz
AQ           1.0813940 sec
RG           2895.3
DM           16.500 usec
DE           4.50 usec
TE           300.0 K
O1           0.2500000 sec
O11          0.0300000 sec

===== CHANNEL f1 =====
NUC1         13C
P1           26.50 usec
PL1          -6.00 dB
SFO1        125.7942048 MHz

===== CHANNEL f2 =====
CPDPRG2      waltz16
NUC2         1H
PCPD2        80.00 usec
PL2          -1.00 dB
PL12         14.40 dB
SFO2        500.2230013 MHz

F2 - Processing parameters
S1           65536
SF           125.7804258 MHz
WDW          EM
SSB          0
LB           1.00 Hz
GB           0
PC           2.00

1D NMR plot parameters
CX           22.80 cm
F1P          200.000 ppm
F1           25156.09 Hz
F2P          0.000 ppm
F2           0.00 Hz
PPMCM       8.77193 ppm/cm
HZCM        1103.33716 Hz/cm
    
```

<sup>1</sup>H spectrum

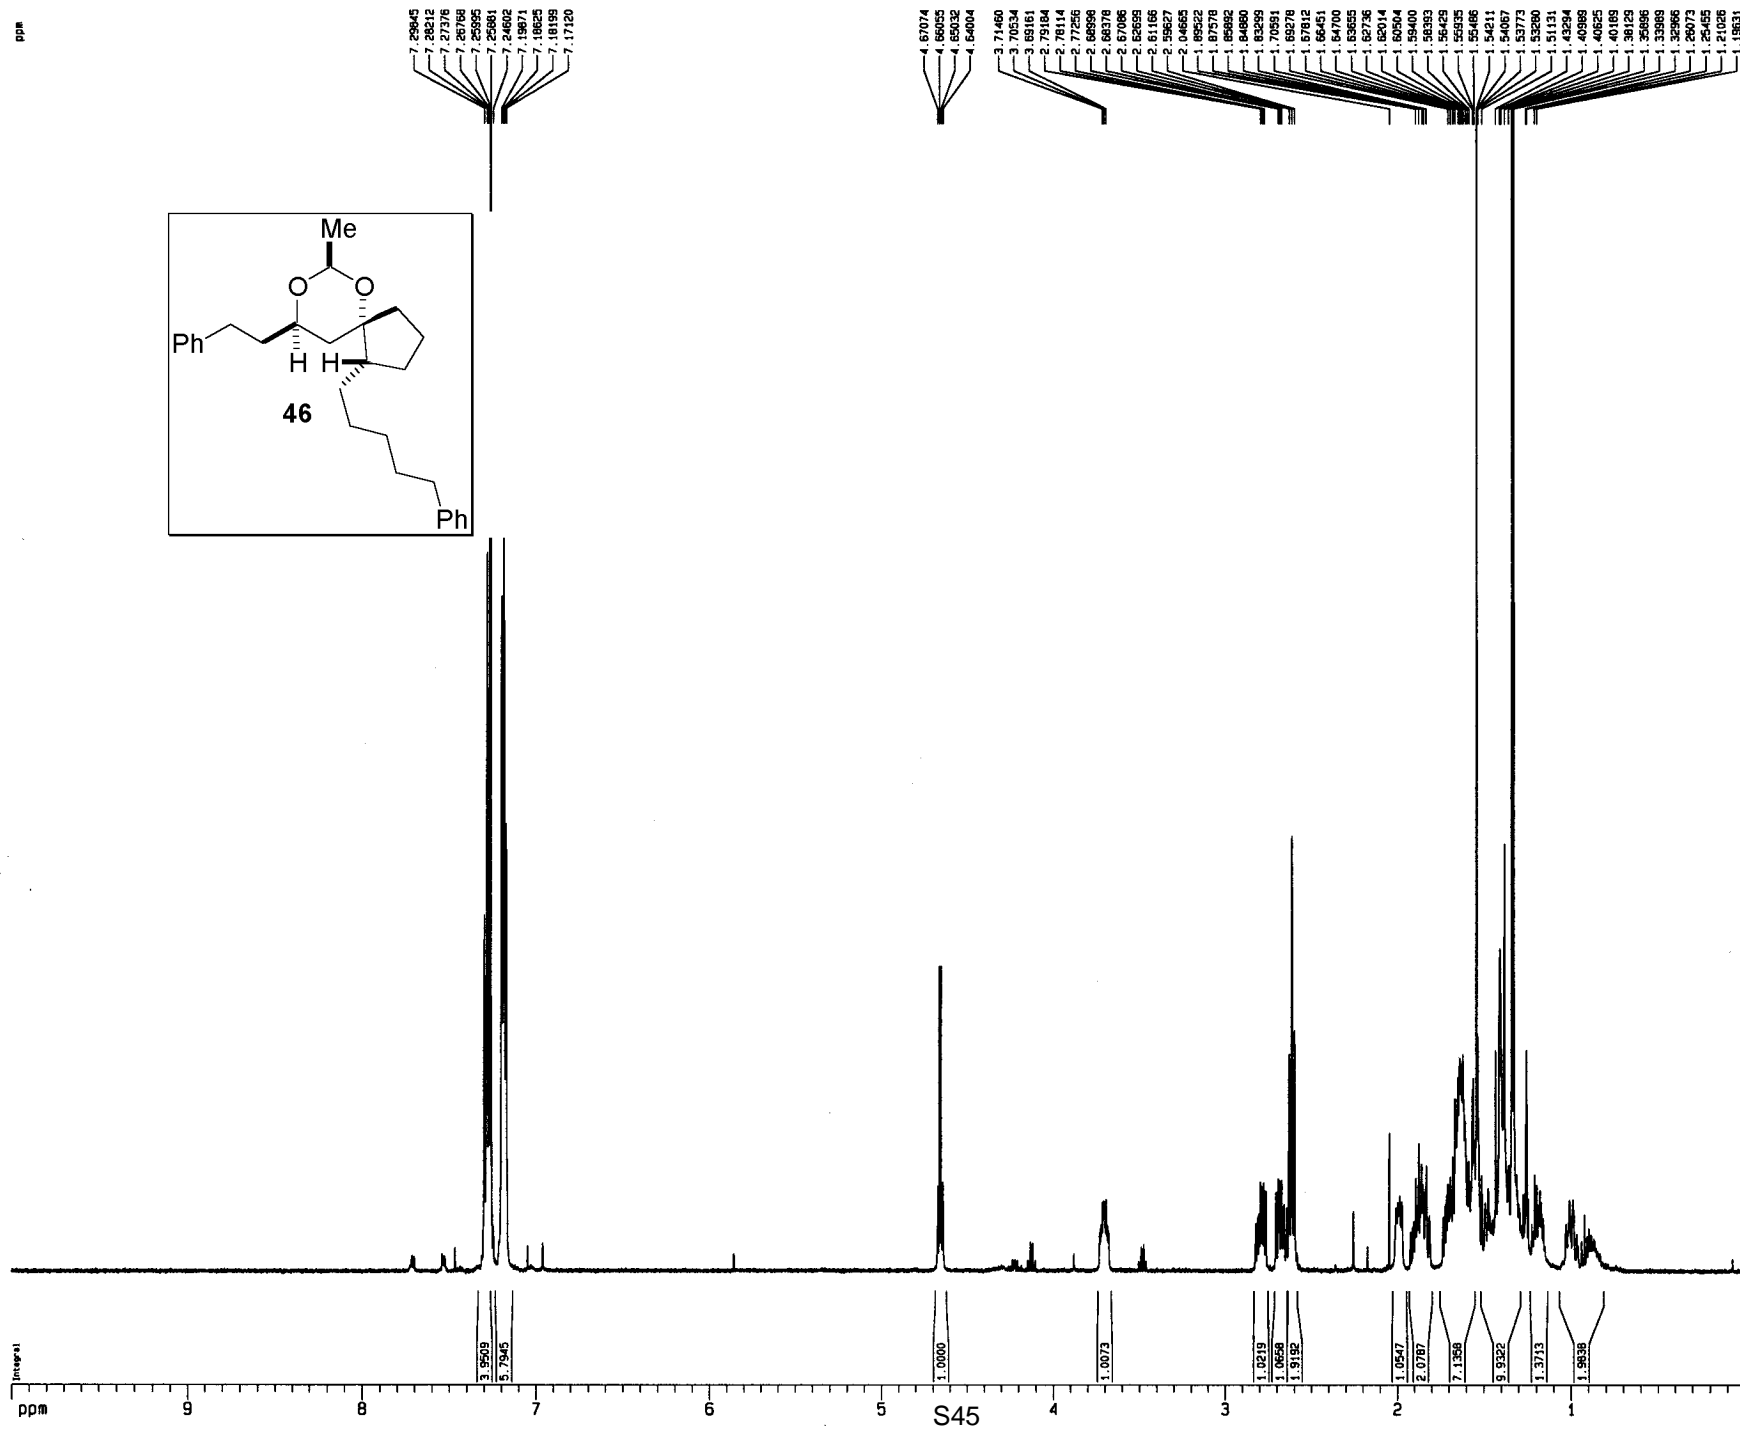

Current Data Parameters  
 USER jacruz  
 NAME tl-1-195  
 EXPNO 1  
 PROCNO 1

F2 - Acquisition Parameters  
 Date\_ 20030415  
 Time 13.41  
 INSTRUM omega500  
 PROBHD 5 mm broadband  
 PULPROG zg30  
 TD 65536  
 SOLVENT CDC13  
 NS 48  
 DS 2  
 SWH 9042.820 Hz  
 FIDRES 0.122266 Hz  
 AQ 4.0894966 sec  
 RG 352  
 DM 62.400 usec  
 DE 6.00 usec  
 TE 300.0 K  
 D1 0.1000000 sec

----- CHANNEL f1 -----  
 NUC1 1H  
 P1 13.00 usec  
 PL1 -1.00 dB  
 SFO1 500.2235015 MHz

F2 - Processing parameters  
 SI 65536  
 SF 500.2200315 MHz  
 WDW no  
 SSB 0  
 LB 0.00 Hz  
 GB 0  
 PC 4.00

1D NMR plot parameters  
 CX 22.80 cm  
 F1P 10.000 ppm  
 F1 5002.20 Hz  
 F2P 0.000 ppm  
 F2 0.00 Hz  
 PPMCM 0.43860 ppm/cm  
 HZCM 219.39476 Hz/cm

13C spectrum with 1H decoupling

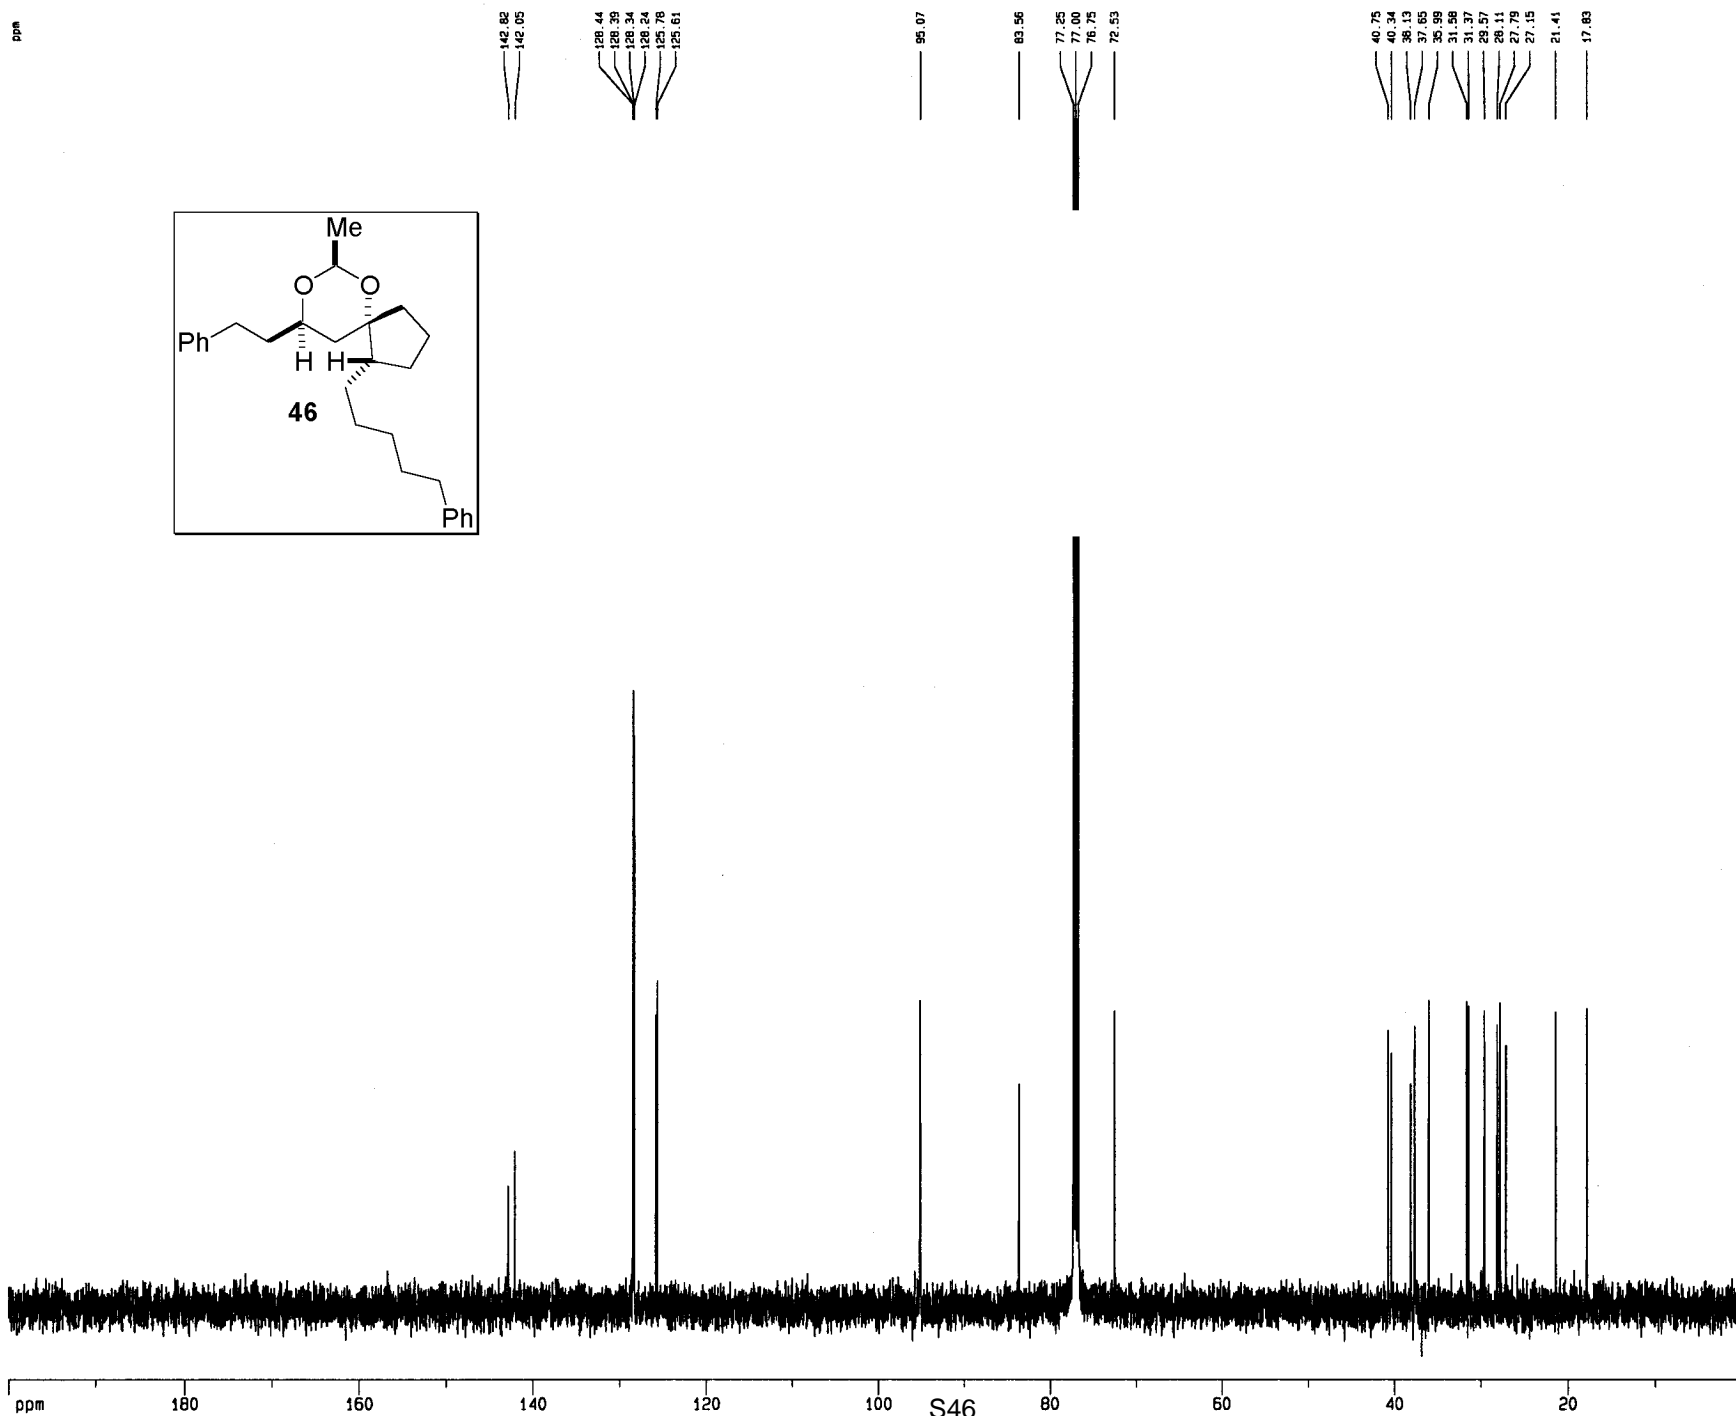

Current Data Parameters  
 USER lacruz  
 NAME t1-1-195  
 EXPNO 2  
 PROCNO 1

F2 - Acquisition Parameters  
 Date\_ 20030414  
 Time 19.44  
 INSTRUM omeg500  
 PROBHD 5 mm broadband  
 PULPROG zgpg30  
 TD 65536  
 SOLVENT CDCl3  
 NS 3072  
 DS 4  
 SWH 30303.031 Hz  
 FIDRES 0.462368 Hz  
 AQ 1.0813940 sec  
 RG 8192  
 DW 16.500 usec  
 DE 4.50 usec  
 TE 300.0 K  
 O1 0.2500000 sec  
 O11 0.0300000 sec

----- CHANNEL f1 -----  
 NUC1 13C  
 P1 26.50 usec  
 PL1 -6.00 dB  
 SFO1 125.7942048 MHz

----- CHANNEL f2 -----  
 CPOPRG2 waltz16  
 NUC2 1H  
 PPRG2 80.00 usec  
 PL2 -1.00 dB  
 PL12 14.40 dB  
 SFO2 500.2230013 MHz

F2 - Processing parameters  
 SI 65536  
 SF 125.7804262 MHz  
 NDW EM  
 SSB 0  
 LB 1.00 Hz  
 GB 0  
 PC 2.00

1D NMR plot parameters  
 CX 22.80 cm  
 F1P 200.000 ppm  
 F1 25156.09 Hz  
 F2P 0.000 ppm  
 F2 0.00 Hz  
 PRMCH 8.77193 ppm/cm  
 HZCM 1103.33716 Hz/cm
